# Supplementary material for: Adult picky eating and associations with childhood picky eating, maternal feeding, aversive sensory responsiveness, disgust and obsessive-compulsive symptoms
Source: PeerJ. 2025 May 16;13:e19444. doi: 10.7717/peerj.19444 (PMC12087578; doi:10.7717/peerj.19444)
Supplement: Supplemental Information 1 [file peerj-13-19444-s001.xlsx]

## Sheet: Sheet1
variable name	interpretation
StartDate	Date of starting the self-report
EndDate	Date of finishing the self=report
Progress	% completion
Finished	got to final sign-off screen
Agreement_study	signed informed consent
Age	in years
Hight	height in centimeters
Weight	in kgs
Education	in years of schooling
Sex	m/f/other
New_Immigrant	Israeli or foreign born
Year_of_immigrantion	if foreign born how many tears since immigration to Israel
Language	mother tongue
Religious_tendency	level of religiosity
Religion	which religion - Jewish, moslem, chirstian, other
family_status	married/single etc.
nutrition	1 vegetarian 2 pescetarian 3 vegan 4 kosher diet 5 unrestricted 6 no dairy 7 other
reason_for_nutrition	reason for nutritional decision: 1 religious (kosher food) 2 medical 3 ideological 4 preference 5 not restricted
Developmental_delay	did you have a developmental delay as a child? Yes/no
Eating_problems	did you have problems with eating as a child?
medical_problems	did you have medical problems as a child?
medical_dignosis	did you receive a diagnosis for a medical problem in childhood? Options: 1 ADHD 2 GI tract 3 sensory (sight hearing etc.) 4 pulminory 5 araising from birth complications such as CP 7 other 8 none 9 none known
medical_dignosis_known	open field for reporting known diagnoses
medical_dignosis_suffering	have the childhood problems persisted into adulthood?
suffering_scale	if there is a medicalcondition currently - how severe are the symptoms?
picky_eating	as a child were you a picky eater?
DPSS_R_1
DPSS_R_2
DPSS_R_3
DPSS_R_4
DPSS_R_5
DPSS_R_6
DPSS_R_7
DPSS_R_8
DPSS_R_9
DPSS_R_10
DPSS_R_11
DPSS_R_12
FDS_1
FDS_2
FDS_3
FDS_4
FDS_5
FDS_6
FDS_7
FDS_8
APEQ_1
APEQ_2
APEQ_3
APEQ_4
APEQ_5
APEQ_6
APEQ_7
APEQ_8
APEQ_9
APEQ_10
APEQ_11
APEQ_12
APEQ_13
APEQ_14
APEQ_15
APEQ_16
OCI_R_1
OCI_R_2
OCI_R_3
OCI_R_4
OCI_R_5
OCI_R_6
OCI_R_7
OCI_R_8
OCI_R_9
OCI_R_10
OCI_R_11
OCI_R_12
OCI_R_13
OCI_R_14
OCI_R_15
OCI_R_16
OCI_R_17
OCI_R_18
PBI_mom_1
PBI_mom_2
PBI_mom_4
PBI_mom_5
PBI_mom_6
PBI_mom_11
PBI_mom_12
PBI_mom_14
PBI_mom_16
PBI_mom_17
PBI_mom_18
PBI_mom_24
PBI_dad_1
PBI_dad_2
PBI_dad_4
PBI_dad_5
PBI_dad_6
PBI_dad_11
PBI_dad_12
PBI_dad_14
PBI_dad_16
PBI_dad_17
PBI_dad_18
PBI_dad_24
RCFQ_5
RCFQ_6
RCFQ_7
RCFQ_8
RCFQ_9
RCFQ_10
RCFQ_14
RCFQ_15
RCFQ_16
RCFQ_17
RCFQ_18
RCFQ_19
RCFQ_20
RCFQ_21
RCFQ_22
RCFQ_23
RCFQ_24
RCFQ_25
RCFQ_26
RCFQ_27
RCFQ_28
SRQ__2
SRQ_5
SRQ_6
SRQ_7
SRQ_11
SRQ_14
SRQ_15
SRQ_18
SRQ_19
SRQ_20
SRQ_21
SRQ_22
SRQ_23
SRQ_24
SRQ_26
SRQ_28
SRQ_29
SRQ_30
SRQ_31
SRQ_32
SRQ_33
SRQ_36
SRQ_39
SRQ_40
SRQ_41
SRQ_44
SRQ_45
SRQ_46
SRQ_48
SRQ_50
SRQ_52
SRQ_54
PBI_dad4_rev
PBI_dad16_rev
PBI_mom4_rev
PBI_mom16_rev
SRQ
OCD
General_Disgust
FDS
APEQ
PBI_mom_caring
PBI_dad_caring
RCFQ_PCW
RCFQ_Restriction
RCFQ_Pressure
RCFQ_Monitoring
OCD_X_FDS
hight_M
BMI_M
QCL_4
ZGeneral_Disgust
ZSRQ
ZRCFQ_Restriction
ZRCFQ_Pressure
ZRCFQ_Monitoring
ZFDS
ZOCD
Zpicky_eating
ZPBI_dad_caring
ZBMI_M
ZAPEQ
ZPBI_mom_caring
Zinteraction
ZAge
ZEducation
ZSex
height
HSQUARE
BMI
BMI_CAT
ZBMI
APEQ_MEAN
APE
OCD1
OCD2
OCD3
OCD4
OCD5
OCD6
OCD7
OCD8
OCD9
OCD10
OCD11
OCD12
OCD13
OCD14
OCD15
OCD16
OCD17
OCD18
