# Supplementary material for: Adult picky eating and associations with childhood picky eating, maternal feeding, aversive sensory responsiveness, disgust and obsessive-compulsive symptoms
Source: PeerJ. 2025 May 16;13:e19444. doi: 10.7717/peerj.19444 (PMC12087578; doi:10.7717/peerj.19444)
Supplement: Supplemental Information 3 [file peerj-13-19444-s003.xlsx]

## Sheet: PeerJ data
StartDate	EndDate	Progress	Finished	Agreement_study	Age	Hight	Weight	Education	Sex	New_Immigrant	Year_of_immigrantion	Language	Religious_tendency	Religion	family_status	nutrition	reason_for_nutrition	Developmental_delay	Eating_problems	medical_problems	medical_dignosis	medical_dignosis_known	medical_dignosis_suffering	suffering_scale	picky_eating	DPSS_R_1	DPSS_R_2	DPSS_R_3	DPSS_R_4	DPSS_R_5	DPSS_R_6	DPSS_R_7	DPSS_R_8	DPSS_R_9	DPSS_R_10	DPSS_R_11	DPSS_R_12	FDS_1	FDS_2	FDS_3	FDS_4	FDS_5	FDS_6	FDS_7	FDS_8	APEQ_1	APEQ_2	APEQ_3	APEQ_4
2021-07-19 03:51:58	2021-07-19 04:00:28	100	1	1	#NULL!	#NULL!	#NULL!	#NULL!	#NULL!	#NULL!	#NULL!	#NULL!	#NULL!	#NULL!	#NULL!	#NULL!	#NULL!	#NULL!	#NULL!	#NULL!	#NULL!		#NULL!	#NULL!	1	4	2	2	4	5	5	3	5	2	4	2	4	5	5	2	3	5	5	3	5	4	4	5	3
2021-07-11 19:31:07	2021-07-11 19:48:21	100	1	1	31	172	67	15	1	2	#NULL!	1	2	1	1	1	3	2	2	4	1	breathlessness	2	#NULL!	0	4	2	2	2	3	3	4	3	4	3	2	2	5	4	2	3	4	4	2	4	1	1	2	4
2021-07-12 23:05:52	2021-07-12 23:25:49	100	1	1	41	172	72	18	1	2	#NULL!	1	2	1	4	1	3	2	2	8	2		4	5	0	5	1	1	2	2	3	2	2	1	2	1	1	5	3	2	1	2	4	4	3	2	2	1	2
2021-07-18 16:52:28	2021-07-18 17:06:03	100	1	1	33	182	69	17	1	2	#NULL!	1	2	1	3	1	4	2	1	8	2		3	#NULL!	1	4	1	3	3	3	4	4	2	3	3	1	1	5	4	2	2	4	5	#NULL!	4	4	5	4	3
2021-07-18 23:26:15	2021-07-18 23:40:47	100	1	1	36	179	95	22	1	2	#NULL!	1	2	5	1	1	3	2	2	8	1	IBS	1	40	0	4	1	1	4	3	4	4	4	3	4	4	3	3	5	2	1	3	1	3	5	3	1	4	2
2021-07-11 18:20:43	2021-07-11 18:31:05	100	1	1	25	163	57	12	2	2	1948	1	2	1	4	1	3	2	2	8	2		3	#NULL!	0	4	1	1	3	3	3	2	3	3	3	2	2	5	4	2	4	2	3	4	5	3	2	2	2
2021-07-11 18:00:48	2021-07-11 18:32:55	100	1	1	25	162	53	15	2	2	#NULL!	1	2	1	4	1	3	3	2	1	2		1	40	0	5	1	2	2	2	2	2	2	2	3	1	1	5	3	3	1	2	5	5	5	2	3	1	1
2021-07-11 19:30:33	2021-07-11 19:41:23	100	1	1	45	161	65	20	2	2	#NULL!	1	2	1	1	1	4	2	2	8	2		3	#NULL!	0	#NULL!	1	1	3	1	2	1	2	2	2	1	1	5	5	1	1	2	1	1	4	1	1	2	2
2021-07-11 20:01:07	2021-07-11 20:16:20	100	1	1	27	171	60	15	2	2	#NULL!	1	2	1	4	1	4	2	2	5	1	albino therefore eyesight problems	1	21	0	5	1	1	4	2	3	1	3	2	4	1	1	5	5	1	2	5	5	4	5	3	1	2	5
2021-07-11 21:17:37	2021-07-11 21:45:55	100	1	1	25	173	64	15	2	2	1948	1	2	1	4	1	3	2	2	2	1	lactose sesivitiy	2	#NULL!	0	3	1	2	3	3	3	2	2	3	3	1	1	5	4	1	4	2	5	3	5	1	2	1	2
2021-07-11 23:35:16	2021-07-11 23:42:58	100	1	1	32	158	96	15	2	2	#NULL!	1	2	1	3	1	4	2	2	7	1	hypo-thyrodism	1	#NULL!	0	3	1	2	2	1	3	3	3	2	2	1	2	5	4	1	1	3	5	5	3	2	2	3	3
2021-07-12 02:10:30	2021-07-12 02:25:51	100	1	1	30	160	60	18	2	2	#NULL!	1	5	6	4	1	3	2	2	8	2		3	#NULL!	0	3	1	2	3	1	1	3	3	3	4	1	4	1	1	1	1	1	1	1	1	2	2	1	1
2021-07-12 08:50:10	2021-07-12 09:04:43	100	1	1	21	160	54	15	2	2	#NULL!	1	2	1	3	1	3	2	2	4	1	asthma	1	25	1	4	2	2	5	4	3	4	4	1	3	2	2	5	3	1	2	4	5	3	5	3	1	1	1
2021-07-12 12:28:31	2021-07-12 12:45:10	100	1	1	32	163	46	17	2	2	#NULL!	1	2	1	1	1	3	2	1	7	1	hyper thyrodism and ADHD	1	61	1	5	1	2	4	3	4	4	4	3	3	3	3	5	5	3	3	5	5	5	3	3	4	2	5
2021-07-12 13:46:13	2021-07-12 13:59:44	100	1	1	30	173	75	18	2	2	#NULL!	1	2	1	3	1	3	2	2	3	2		2	#NULL!	0	4	2	4	3	3	1	5	3	3	3	2	4	5	4	4	2	3	5	3	3	4	3	3	2
2021-07-12 13:58:23	2021-07-12 14:10:46	100	1	1	38	0	0	15	2	2	#NULL!	1	2	1	1	1	3	2	3	2	1	Reflux	1	36	1	2	1	1	2	2	2	1	2	2	3	1	1	5	3	1	2	3	2	2	4	1	1	1	1
2021-07-12 14:24:54	2021-07-12 14:33:45	100	1	1	27	158	62	17	2	2	#NULL!	1	2	1	3	1	3	2	2	4	2		2	#NULL!	1	5	4	5	2	4	4	5	3	4	4	3	2	5	5	5	1	5	5	5	5	3	3	3	4
2021-07-12 14:52:10	2021-07-12 15:03:40	100	1	1	25	155	72	16	2	2	#NULL!	1	1	1	1	1	3	2	2	9	2		4	7	0	3	3	4	3	2	2	4	2	2	2	1	2	5	4	1	5	3	5	5	5	2	1	2	2
2021-07-12 16:59:52	2021-07-12 18:10:25	100	1	1	40	166	57	21	2	2	#NULL!	1	2	1	3	1	4	2	1	8	2		4	14	1	4	1	1	3	3	3	1	4	2	5	1	1	5	5	3	3	5	5	5	5	3	4	4	4
2021-07-12 18:01:08	2021-07-12 18:22:59	100	1	1	23	154	73	13	2	2	1948	1	2	1	3	1	4	2	2	8	2		3	#NULL!	0	4	1	3	3	2	3	3	2	3	3	2	2	5	3	3	4	3	4	4	5	3	2	2	2
2021-07-12 20:57:49	2021-07-12 21:07:31	100	1	1	25	155	54	15	2	2	#NULL!	1	2	1	3	1	4	3	1	5	1	Hashimoto	1	70	1	5	2	2	3	3	4	2	4	2	5	2	3	5	4	2	5	3	5	5	5	3	5	3	3
2021-07-12 21:15:54	2021-07-12 21:30:29	100	1	1	26	150	43	15	2	2	#NULL!	1	2	1	3	1	3	2	1	7	1	An autoimmune disease of the joints	2	#NULL!	1	5	1	3	3	4	3	3	4	2	4	1	3	5	2	1	1	2	5	4	3	2	1	1	2
2021-07-12 21:43:54	2021-07-12 21:56:07	100	1	1	34	179	104	17	2	2	#NULL!	1	2	1	1	1	4	2	2	9	2		3	#NULL!	1	4	2	2	3	3	3	2	3	2	4	2	2	5	4	3	1	5	3	5	5	3	3	2	2
2021-07-12 22:30:43	2021-07-12 22:39:35	100	1	1	27	170	64	15	2	2	#NULL!	1	2	1	4	1	3	2	3	5	2		1	61	1	5	2	3	3	4	4	4	4	4	4	4	1	5	3	1	2	2	5	4	5	2	3	1	5
2021-07-13 00:54:16	2021-07-13 01:07:27	100	1	1	27	167	70	16	2	2	#NULL!	1	3	1	4	1	1	2	2	1	2		3	#NULL!	1	5	1	3	5	3	2	2	5	1	3	1	2	5	5	3	4	4	5	5	5	4	3	1	1
2021-07-13 08:59:12	2021-07-13 10:28:33	100	1	1	43	171	75	17	2	2	#NULL!	1	2	1	1	1	3	2	2	8	2		3	0	0	4	1	2	3	2	2	2	3	4	2	3	3	5	4	1	1	1	3	1	2	1	1	1	1
2021-07-13 13:04:25	2021-07-13 13:17:49	100	1	1	26	164	58	15	2	2	#NULL!	1	2	1	3	1	3	2	1	5	1	anorexia	2	20	1	4	1	1	4	3	3	1	4	3	4	1	1	5	5	2	4	3	5	3	5	2	4	1	1
2021-07-13 22:29:20	2021-07-13 22:44:30	100	1	1	21	162	46	13	2	2	1948	1	1	1	4	1	4	2	2	8	2		3	#NULL!	0	4	1	2	3	3	3	3	4	2	3	1	1	5	5	4	5	4	5	5	5	3	2	3	2
2021-07-13 23:29:13	2021-07-13 23:38:44	100	1	1	18	160	50	12	2	2	#NULL!	1	2	1	3	1	3	2	2	4	1	asthma	1	29	1	5	2	3	4	4	4	3	3	2	3	2	3	5	5	3	3	4	5	4	5	3	4	4	2
2021-07-14 10:00:06	2021-07-14 10:15:07	100	1	1	41	170	67	18	2	2	#NULL!	1	2	1	1	1	3	2	1	2	2		2	#NULL!	1	3	1	1	3	1	2	1	3	1	3	1	1	5	5	2	2	4	5	5	5	1	3	1	2
2021-07-14 10:16:17	2021-07-14 10:28:27	100	1	1	25	162	55	15	2	2	#NULL!	1	2	1	4	1	3	2	1	8	1		2	#NULL!	1	4	1	4	3	4	3	4	3	2	4	2	2	5	4	5	4	4	5	5	5	4	5	4	4
2021-07-14 16:31:27	2021-07-14 16:50:46	100	1	1	33	159	69	23	2	2	#NULL!	1	2	1	4	1	3	2	2	8	2		3	#NULL!	0	3	1	1	3	3	3	2	3	1	3	1	1	1	4	1	1	2	1	3	5	4	1	1	1
2021-07-14 17:30:23	2021-07-14 17:45:04	100	1	1	30	160	58	19	2	2	#NULL!	1	2	1	1	1	3	2	2	8	2		3	#NULL!	0	3	1	1	2	3	3	4	2	3	3	2	1	4	3	1	1	1	2	2	5	1	1	2	2
2021-07-14 20:12:41	2021-07-14 20:35:25	100	1	1	33	160	61	18	2	2	#NULL!	1	3	1	3	1	4	2	2	1	2		3	#NULL!	1	4	1	1	1	1	2	1	2	2	2	2	2	4	4	3	3	2	5	2	4	3	2	3	2
2021-07-14 23:52:50	2021-07-15 00:01:01	100	1	1	25	162	60	18	2	2	#NULL!	1	1	1	3	1	4	2	2	3	2		1	10	1	5	2	1	3	5	5	2	3	1	3	1	1	5	4	3	3	3	5	5	5	2	3	3	1
2021-07-17 23:01:09	2021-07-17 23:15:46	100	1	1	22	0	0	13	2	2	#NULL!	1	3	1	4	1	2	1	1	4	2		1	1	1	5	4	3	3	3	4	4	3	5	5	1	1	5	5	5	5	3	5	5	5	5	5	5	5
2021-07-18 16:23:38	2021-07-18 16:36:27	100	1	1	23	165	69	12	2	2	#NULL!	1	2	1	4	1	4	2	2	9	2		3	#NULL!	1	5	1	1	4	4	3	4	4	2	5	4	5	5	5	2	5	3	5	5	5	3	5	2	4
2021-07-18 16:34:43	2021-07-18 16:43:09	100	1	1	40	165	83	16	2	2	#NULL!	1	2	1	4	1	4	2	2	9	2		3	#NULL!	1	5	2	#NULL!	4	3	4	4	4	3	4	1	2	5	3	5	1	1	5	4	5	4	2	3	2
2021-07-18 16:53:08	2021-07-18 17:05:39	100	1	1	22	162	55	12	2	2	1948	1	2	1	4	1	3	2	2	8	2		3	#NULL!	1	5	1	1	4	2	4	1	4	1	5	5	5	5	3	2	3	1	5	5	5	3	5	1	1
2021-07-18 17:07:58	2021-07-18 17:13:45	100	1	1	24	157	60	14	2	2	#NULL!	1	2	1	3	1	3	2	1	8	2		3	#NULL!	1	5	1	1	4	4	2	1	5	1	5	3	4	5	2	1	1	5	1	2	3	4	4	2	2
2021-07-18 17:07:17	2021-07-18 17:18:48	100	1	1	25	170	72	15	2	2	1948	1	2	5	4	1	3	2	2	8	2		3	#NULL!	0	3	1	2	2	2	3	3	2	3	3	1	1	5	4	3	1	2	1	3	3	3	1	1	1
2021-07-18 17:20:24	2021-07-18 17:30:32	100	1	1	25	150	57	15	2	2	1948	1	2	1	3	1	4	2	2	8	2		3	#NULL!	1	4	2	2	1	2	4	3	3	2	2	1	3	5	4	1	2	5	5	2	5	2	3	4	4
2021-07-18 17:26:26	2021-07-18 17:44:34	100	1	1	22	161	55	13	2	2	#NULL!	1	2	1	3	1	3	1	1	7	2		1	35	1	5	2	1	4	4	4	3	3	2	4	2	1	5	5	4	5	5	5	5	5	4	4	3	4
2021-07-18 17:47:57	2021-07-18 17:58:14	100	1	1	32	161	51	15	2	2	#NULL!	1	2	5	4	1	3	2	2	4	1	asthma and strido	2	#NULL!	0	4	1	1	2	3	3	2	4	2	5	1	3	5	4	1	5	5	5	5	5	1	1	1	2
2021-07-18 18:02:05	2021-07-18 18:14:42	100	1	1	22	180	60	12	2	2	#NULL!	1	3	1	3	1	4	2	1	8	2		3	#NULL!	0	5	2	2	2	3	3	2	3	1	3	2	2	5	4	2	4	4	5	4	5	4	3	2	4
2021-07-18 18:06:02	2021-07-18 18:22:13	100	1	1	35	170	89	23	2	2	#NULL!	1	2	1	1	1	3	3	2	4	1	asthma	1	7	1	3	1	1	3	2	3	1	3	2	3	4	4	5	3	3	3	4	5	5	4	3	3	3	2
2021-07-18 18:14:18	2021-07-18 18:26:47	100	1	1	25	160	47	14	2	2	#NULL!	1	2	5	3	1	3	2	2	4	1	hypoglycemia and GAD	1	50	1	5	2	2	4	4	4	2	4	3	4	2	4	5	4	3	4	5	2	5	5	2	3	2	2
2021-07-18 18:45:41	2021-07-18 18:57:50	100	1	1	24	150	46	16	2	2	#NULL!	1	2	1	4	1	3	2	2	4	1	kidney disease	2	#NULL!	1	4	2	2	2	5	5	3	4	3	5	1	3	5	4	2	3	2	5	3	3	4	4	2	4
2021-07-18 18:47:27	2021-07-18 18:59:16	100	1	1	27	164	77	15	2	2	#NULL!	1	2	1	3	1	4	2	2	8	2		3	#NULL!	0	5	3	3	4	4	3	3	3	3	4	2	3	5	5	3	3	5	5	5	5	1	2	2	2
2021-07-18 18:54:28	2021-07-18 19:01:24	100	1	1	29	169	75	12	2	2	#NULL!	1	2	1	3	1	3	2	2	5	2		1	60	0	5	2	2	2	3	3	4	2	3	2	1	1	5	4	4	4	4	5	5	5	4	3	1	3
2021-07-18 18:56:50	2021-07-18 19:05:19	100	1	1	38	168	62	14	2	2	#NULL!	1	2	5	4	1	3	2	2	2	1	ADHD and dyslexia	1	59	0	5	2	1	3	3	3	2	2	1	3	1	1	5	4	4	3	4	5	4	5	3	2	3	2
2021-07-18 19:24:35	2021-07-18 19:42:59	100	1	1	24	174	80	14	2	2	#NULL!	1	2	1	4	1	3	2	2	8	2		3	#NULL!	0	3	2	4	3	2	3	4	2	3	2	1	2	5	4	1	3	2	2	4	5	2	2	2	2
2021-07-18 20:09:42	2021-07-18 20:25:24	100	1	1	30	170	78	22	2	2	#NULL!	1	2	1	1	1	3	2	2	5	1	OCD	1	38	0	3	1	2	1	2	2	4	2	2	2	2	2	5	5	3	3	1	1	4	5	2	2	2	2
2021-07-18 20:27:59	2021-07-18 20:37:22	100	1	1	24	165	48	15	2	2	#NULL!	1	2	1	4	1	4	2	2	8	1	Migarines	1	38	1	4	1	5	3	3	3	5	3	3	3	2	3	5	5	4	5	4	5	5	5	5	5	3	5
2021-07-18 21:10:14	2021-07-18 21:23:55	100	1	1	31	158	43	18	2	2	#NULL!	1	1	1	1	1	1	2	2	8	1	Asthma	1	10	0	4	1	1	2	2	2	1	3	1	2	1	1	3	3	3	3	1	3	5	5	2	2	3	4
2021-07-18 22:14:20	2021-07-18 22:27:13	100	1	1	26	157	84	15	2	2	#NULL!	1	2	1	3	1	3	2	3	8	2		3	#NULL!	1	5	2	1	3	3	4	1	3	3	4	1	2	4	2	1	1	5	5	5	5	2	4	3	1
2021-07-18 22:32:22	2021-07-18 22:47:20	100	1	1	24	146	50	13	2	2	#NULL!	1	3	1	3	1	4	2	2	8	2		3	0	0	5	3	3	4	5	4	3	4	3	5	5	3	5	5	5	5	4	5	5	5	5	5	3	4
2021-07-18 23:01:52	2021-07-18 23:18:38	100	1	1	29	162	65	15	2	2	#NULL!	1	2	1	4	1	3	2	2	1	2		1	30	1	4	1	1	2	2	3	1	3	3	3	1	2	5	4	3	1	2	5	3	4	2	3	3	2
2021-07-18 23:18:23	2021-07-18 23:31:00	100	1	1	27	164	58	17	2	2	#NULL!	1	2	1	4	1	3	3	2	7	2		3	#NULL!	1	3	1	2	3	2	3	1	3	2	3	2	3	5	4	4	5	4	5	3	5	4	3	3	2
2021-07-19 00:37:10	2021-07-19 00:52:44	100	1	1	29	162	50	18	2	2	#NULL!	1	2	1	4	1	3	2	2	8	2		3	#NULL!	1	4	1	2	3	3	3	3	4	2	4	1	3	5	4	3	4	4	5	5	2	3	3	2	1
2021-07-19 00:43:33	2021-07-19 01:05:22	100	1	1	21	159	46	12	2	2	#NULL!	1	2	1	3	1	3	2	2	9	2		3	#NULL!	0	4	1	1	3	2	3	2	3	2	2	1	1	1	3	1	1	2	1	3	4	4	3	3	4
2021-07-19 01:36:33	2021-07-19 01:54:16	100	1	1	45	172	125	17	2	2	#NULL!	1	1	1	3	1	1	2	3	9	2		3	#NULL!	1	3	1	2	3	3	3	3	2	4	3	2	4	5	5	5	5	5	5	5	5	3	2	3	1
2021-07-19 01:49:02	2021-07-19 02:04:53	100	1	1	27	156	52	17	2	2	#NULL!	1	1	1	3	1	1	2	2	9	1	eyesight problems	4	72	0	2	1	1	2	2	2	1	2	2	2	2	1	5	4	3	5	2	5	2	5	2	2	2	2
2021-07-19 07:44:43	2021-07-19 07:56:25	100	1	1	36	160	54	17	2	2	1948	1	3	1	2	1	4	2	1	9	2		#NULL!	#NULL!	1	4	2	2	3	3	3	2	3	2	3	3	3	5	1	4	4	4	5	5	4	4	4	3	4
2021-07-19 08:28:01	2021-07-19 08:44:22	100	1	1	40	167	83	15	2	2	#NULL!	1	2	1	1	1	2	2	1	4	1	diabetes	1	20	1	4	2	2	5	2	5	4	4	2	3	2	2	5	5	5	5	4	5	5	5	1	4	2	2
2021-07-19 09:25:59	2021-07-19 09:38:23	100	1	1	37	175	80	22	2	2	#NULL!	1	2	1	4	1	3	2	3	8	1	Dermetitis	1	20	1	4	1	1	3	3	4	2	3	2	4	1	1	5	5	2	2	3	5	5	5	3	2	2	3
2021-07-19 10:03:18	2021-07-19 10:13:55	100	1	1	23	155	55	12	2	2	#NULL!	1	2	1	3	1	3	3	1	8	2		3	#NULL!	1	5	2	5	4	3	4	5	4	3	4	1	2	5	4	2	5	5	5	5	5	1	1	1	4
2021-07-19 10:13:22	2021-07-19 10:30:21	100	1	1	23	166	66	13	2	2	#NULL!	1	2	1	4	1	3	2	1	5	2		2	#NULL!	1	4	3	3	4	4	5	3	4	2	4	1	3	4	1	3	4	3	5	5	5	4	2	2	3
2021-07-19 10:13:34	2021-07-19 10:34:10	100	1	1	23	175	64	12	2	2	#NULL!	1	2	1	4	1	3	2	1	5	1	Asthma and adult ADHD	1	30	1	3	2	2	3	3	4	4	3	3	2	1	1	5	2	1	3	3	4	4	5	3	2	2	1
2021-07-11 18:06:05	2021-07-11 18:16:02	100	1	1	55	184	99	12	1	2	2021	1	3	1	1	2	5	2	2	8	2		4	#NULL!	0	5	1	1	1	5	5	1	3	3	2	3	5	5	5	5	5	5	5	5	5	3	3	3	2
2021-07-19 09:46:16	2021-07-19 10:12:36	100	1	1	64	170	61	17	1	2	1948	1	2	5	1	2	3	2	2	8	2		4	#NULL!	1	4	1	3	3	2	3	2	2	3	3	2	2	1	2	2	3	3	2	4	4	2	4	4	4
2021-07-11 17:24:39	2021-07-11 17:51:00	100	1	1	27	163	55	16	2	2	#NULL!	1	2	1	4	2	4	2	2	8	2		3	#NULL!	0	5	3	4	5	5	5	5	4	5	3	1	3	5	5	5	1	4	1	5	5	1	3	1	4
2021-07-11 19:06:49	2021-07-11 19:18:58	100	1	1	26	158	54	15	2	2	#NULL!	1	2	1	4	2	3	2	2	8	2		3	#NULL!	0	4	3	3	4	5	5	3	3	4	4	4	1	5	5	4	5	5	5	5	5	1	1	1	1
2021-07-11 19:47:06	2021-07-11 20:04:49	100	1	1	22	178	63	12	2	2	#NULL!	1	2	1	3	2	4	2	2	8	2		3	#NULL!	0	2	1	3	4	1	4	1	3	4	2	1	3	5	5	5	1	1	4	4	5	5	2	3	4
2021-07-11 21:55:33	2021-07-11 22:12:44	100	1	1	35	165	63	16	2	1	1991	4	2	1	3	2	3	2	2	8	2		4	20	0	4	1	1	2	3	1	1	2	3	2	1	1	1	5	5	1	3	1	2	4	4	1	2	1
2021-07-11 18:50:31	2021-07-11 23:02:23	100	1	1	27	172	68	15	2	2	#NULL!	1	2	1	3	2	3	2	2	1	2		1	55	0	4	1	4	3	4	2	4	3	3	3	1	2	3	5	4	5	5	5	5	5	4	1	3	3
2021-07-11 23:43:46	2021-07-11 23:54:34	100	1	1	28	163	52	18	2	2	#NULL!	1	2	1	3	2	3	2	2	8	2		3	#NULL!	0	4	1	1	3	2	3	2	3	3	3	2	1	4	3	4	2	2	3	4	5	3	1	2	2
2021-07-12 09:52:26	2021-07-12 10:09:57	100	1	1	30	165	54	12	2	2	#NULL!	4	2	1	1	2	3	2	2	2	2		2	#NULL!	0	2	1	1	1	1	2	1	2	1	2	1	1	5	4	2	3	1	1	2	5	2	1	1	1
2021-07-12 11:57:16	2021-07-12 12:37:18	100	1	1	25	164	47	16	2	2	#NULL!	1	2	1	4	2	3	2	2	8	2		3	#NULL!	0	3	1	2	3	4	3	3	3	2	3	1	1	5	3	1	3	3	1	3	5	1	1	1	2
2021-07-12 13:51:31	2021-07-12 14:03:57	100	1	1	31	160	72	21	2	2	1994	1	2	1	3	2	2	2	2	8	1	IBS	4	25	1	4	3	5	3	3	4	4	3	3	3	2	2	1	4	3	1	1	2	2	5	2	2	2	3
2021-07-12 14:45:05	2021-07-12 14:56:02	100	1	1	28	160	65	18	2	2	#NULL!	1	2	1	4	2	3	2	2	7	1	diabetes	1	15	0	4	1	3	2	2	3	4	2	1	2	2	2	5	5	4	3	3	2	4	4	2	3	2	2
2021-07-12 15:29:04	2021-07-12 15:45:05	100	1	1	31	159	53	17	2	2	#NULL!	1	2	1	1	2	3	2	1	5	1	selective eating in childhood and adolescent eating disorder	2	0	1	4	1	1	3	4	4	1	3	1	3	1	3	5	4	2	1	2	4	4	5	3	1	1	1
2021-07-12 17:12:43	2021-07-12 17:29:09	100	1	1	28	163	61	16	2	2	#NULL!	1	2	1	4	2	3	2	2	7	2		2	0	1	4	1	2	4	4	4	2	3	3	3	3	3	5	3	3	2	4	2	3	3	3	2	2	2
2021-07-12 20:07:22	2021-07-12 20:25:18	100	1	1	28	170	75	17	2	2	#NULL!	1	2	1	4	2	3	2	2	8	2		3	0	0	4	2	3	2	3	3	5	3	4	3	2	3	5	4	3	2	1	2	3	5	2	3	3	4
2021-07-12 20:26:15	2021-07-12 20:32:21	100	1	1	25	165	48	15	2	2	#NULL!	1	2	1	3	2	3	2	2	8	2		3	#NULL!	0	4	1	3	3	3	4	5	2	3	2	4	3	5	5	4	4	5	1	4	5	1	1	1	2
2021-07-12 20:35:21	2021-07-12 20:46:46	100	1	1	35	170	80	23	2	2	#NULL!	1	2	1	3	2	3	2	2	8	2		3	#NULL!	0	4	1	1	3	4	3	3	3	2	3	1	2	5	4	3	3	3	4	4	4	2	2	2	2
2021-07-12 21:22:28	2021-07-12 21:35:41	100	1	1	29	170	63	15	2	2	#NULL!	1	2	1	4	2	2	2	2	2	2		4	30	0	4	1	2	2	2	3	2	2	3	3	1	1	3	2	4	3	4	4	3	5	3	2	2	2
2021-07-13 00:51:34	2021-07-13 01:05:08	100	1	1	25	165	58	15	2	2	#NULL!	1	2	1	3	2	4	2	2	8	2		3	#NULL!	0	4	1	3	3	5	3	3	3	4	4	2	2	5	5	4	3	2	1	4	4	4	2	1	4
2021-07-13 04:48:24	2021-07-13 04:59:54	100	1	1	39	159	74	19	2	2	#NULL!	1	2	1	1	2	3	2	2	8	2		3	#NULL!	0	4	1	1	2	3	3	2	3	2	3	2	3	5	5	4	5	3	3	5	5	3	2	1	2
2021-07-13 11:46:53	2021-07-13 12:00:18	100	1	1	25	162	50	14	2	2	#NULL!	1	2	1	4	2	4	2	2	8	1	Migraines	1	20	1	3	1	2	3	2	3	3	3	4	3	1	2	5	5	5	1	2	5	5	4	3	2	1	1
2021-07-13 13:38:31	2021-07-13 13:51:36	100	1	1	21	170	62	15	2	2	#NULL!	1	2	1	4	2	3	2	2	4	1	Asthma	2	#NULL!	0	5	1	1	3	4	4	3	3	2	3	1	1	5	5	3	5	3	2	2	5	3	2	1	1
2021-07-13 15:07:36	2021-07-13 15:27:05	100	1	1	25	158	49	13	2	2	#NULL!	1	2	1	1	2	1	2	2	8	2		3	#NULL!	0	5	1	5	2	3	2	5	2	2	2	1	2	5	5	1	1	3	1	3	3	2	2	#NULL!	2
2021-07-13 22:33:59	2021-07-13 22:48:37	100	1	1	38	162	55	17	2	2	#NULL!	1	1	1	1	2	3	2	2	8	2		3	#NULL!	1	4	2	1	3	4	5	2	3	2	3	1	1	5	3	3	5	5	4	5	5	2	1	3	5
2021-07-15 00:38:20	2021-07-15 00:49:33	100	1	1	20	172	57	13	2	2	#NULL!	1	2	1	4	2	3	2	2	1	2		1	98	0	4	1	1	3	1	1	3	3	1	3	1	1	5	5	5	2	1	2	1	3	2	1	3	3
2021-07-18 16:33:46	2021-07-18 16:45:28	100	1	1	25	162	64	16	2	2	#NULL!	1	2	1	3	2	3	2	2	8	1	Migraine	1	70	1	5	1	2	3	1	2	4	2	2	2	1	1	5	5	3	1	2	4	5	5	2	4	2	3
2021-07-18 17:24:06	2021-07-18 17:40:00	100	1	1	33	165	61	19	2	2	#NULL!	1	1	1	1	2	3	2	2	8	2		3	0	0	5	1	2	2	2	2	4	2	4	2	2	3	5	4	3	2	4	3	4	4	2	1	2	2
2021-07-18 18:04:33	2021-07-18 18:12:45	100	1	1	33	170	54	22	2	2	#NULL!	1	2	1	1	2	3	2	1	8	2		3	#NULL!	1	4	1	1	4	3	3	1	3	1	3	2	1	5	4	3	4	2	2	2	4	3	3	2	2
2021-07-18 18:25:33	2021-07-18 18:34:14	100	1	1	26	156	50	14	2	2	#NULL!	1	3	1	3	2	4	2	3	2	2		1	20	0	5	2	2	2	3	5	2	3	1	3	1	2	5	5	3	1	3	1	5	5	1	1	1	4
2021-07-18 18:32:05	2021-07-18 18:41:39	100	1	1	28	168	74	19	2	2	1948	1	2	1	2	2	4	2	2	7	2		2	#NULL!	0	4	1	1	3	2	4	1	2	3	3	1	1	5	3	1	3	3	1	2	1	3	1	4	1
2021-07-18 20:07:22	2021-07-18 20:15:16	100	1	1	24	169	52	15	2	2	#NULL!	1	2	1	3	2	3	2	2	4	1		1	20	1	5	1	1	3	3	5	1	4	1	5	1	1	5	5	2	3	1	5	5	5	4	2	2	5
2021-07-18 20:02:14	2021-07-18 20:17:03	100	1	1	25	159	50	16	2	2	#NULL!	1	2	1	4	2	2	2	1	8	2		3	#NULL!	1	5	2	1	2	1	3	1	2	3	3	1	2	4	5	3	5	2	1	3	5	2	2	2	2
2021-07-18 20:55:08	2021-07-18 21:21:40	100	1	1	59	157	58	18	2	1	1979	6	1	1	1	2	3	2	2	8	2		3	#NULL!	0	4	1	3	3	3	4	4	3	2	3	2	2	4	4	3	1	1	4	2	4	1	1	2	1
2021-07-18 22:09:22	2021-07-18 22:25:42	100	1	1	22	160	57	14	2	1	2003	4	1	1	4	2	1	2	2	8	2		3	#NULL!	0	4	1	1	2	2	4	5	2	5	3	3	3	5	5	5	4	5	1	4	5	4	2	1	1
2021-07-19 01:00:52	2021-07-19 01:21:40	100	1	1	24	160	55	13	2	2	#NULL!	1	2	1	4	2	3	2	2	1	2		1	30	0	3	1	2	3	3	2	2	3	2	3	1	1	5	4	2	4	2	2	3	5	1	2	1	1
2021-07-19 01:00:35	2021-07-19 01:26:09	100	1	1	22	158	48	12	2	2	1948	1	2	1	3	2	4	2	2	8	1	Ulcerative collitis	4	75	1	4	1	4	5	4	4	5	5	5	4	3	5	4	5	4	3	3	2	5	5	5	2	4	3
2021-07-19 03:30:53	2021-07-19 03:39:02	100	1	1	28	171	61	16	2	2	#NULL!	1	2	1	4	2	4	2	2	8	1	collitis	4	27	0	5	1	5	3	4	4	5	3	2	5	2	2	5	4	5	5	5	5	5	5	3	3	1	1
2021-07-19 03:52:08	2021-07-19 04:12:59	100	1	1	46	173	78	20	2	1	1994	4	4	1	1	2	1	2	1	8	2		3	#NULL!	0	5	1	3	1	2	1	1	3	1	3	1	1	1	5	3	5	5	3	1	2	1	4	4	3
2021-07-19 06:20:49	2021-07-19 07:00:54	100	1	1	34	163	75	18	2	2	#NULL!	1	2	1	3	2	5	2	2	8	2		3	#NULL!	1	5	1	1	4	1	3	1	3	2	5	1	1	1	1	1	1	5	1	4	5	1	1	1	1
2021-07-19 07:22:21	2021-07-19 07:35:25	100	1	1	47	165	102	21	2	2	#NULL!	1	2	1	1	2	3	2	1	9	1	diabetes hypothyrodism	4	73	1	5	4	1	4	5	3	5	4	1	5	1	3	5	5	3	5	5	4	5	5	4	4	3	2
2021-07-19 09:12:08	2021-07-19 09:26:12	100	1	1	28	165	56	16	2	2	#NULL!	4	2	1	4	2	3	2	2	8	2		3	#NULL!	0	5	1	4	3	2	5	5	3	3	3	1	1	5	5	3	3	4	5	5	4	2	1	1	3
2021-07-19 09:23:36	2021-07-19 09:42:40	100	1	1	54	160	67	19	2	2	#NULL!	1	2	1	1	2	3	2	2	8	2		3	#NULL!	1	5	1	2	4	4	3	4	3	1	5	3	2	5	5	5	4	4	5	5	5	4	3	2	2
2021-07-19 10:10:44	2021-07-19 10:27:16	100	1	1	24	160	55	14	2	2	#NULL!	1	2	1	4	2	3	2	2	2	1	Krohn's disease	1	40	0	2	1	3	1	1	1	2	2	3	2	2	2	3	5	4	5	5	1	4	5	2	1	1	1
2021-07-19 11:13:37	2021-07-19 11:24:28	100	1	1	24	165	48	15	2	2	#NULL!	1	2	1	4	2	3	2	2	1	2		2	#NULL!	1	3	1	3	1	1	3	3	2	1	2	2	2	5	5	3	1	3	1	4	4	1	1	1	3
2021-07-19 12:09:46	2021-07-19 12:19:43	100	1	1	24	157	50	14	2	2	#NULL!	1	3	1	4	2	3	2	2	8	2		4	30	0	3	1	2	2	2	1	4	3	3	3	1	1	4	3	2	1	1	1	3	5	1	1	1	1
2021-07-11 18:36:03	2021-07-11 18:45:48	100	1	1	31	184	90	12	1	2	1948	1	2	5	1	3	3	2	2	1	2		2	#NULL!	0	4	1	1	1	1	2	3	2	1	2	1	2	4	3	1	1	2	1	2	2	2	3	4	2
2021-07-19 04:38:48	2021-07-19 04:52:34	100	1	1	30	0	0	15	1	1	1996	2	1	1	3	3	3	2	2	3	1	Asthma	2	#NULL!	1	5	1	2	2	2	2	2	2	1	3	1	1	1	3	3	3	3	1	1	5	1	5	3	2
2021-07-11 17:24:25	2021-07-11 17:40:58	100	1	1	33	174	59	16	2	2	#NULL!	1	2	1	3	3	3	2	2	4	1	excessive flexibility	1	19	0	4	1	1	2	3	2	3	3	1	3	1	1	5	5	1	5	3	5	2	1	4	2	1	4
2021-07-11 20:24:46	2021-07-11 20:39:35	100	1	1	27	170	61	17	2	2	#NULL!	1	2	1	3	3	5	2	2	5	2		3	#NULL!	1	4	4	3	4	4	4	3	4	3	4	1	3	5	4	3	2	2	2	3	4	3	2	2	2
2021-07-11 18:27:42	2021-07-11 20:42:55	100	1	1	23	162	58	14	2	2	#NULL!	1	2	1	3	3	3	2	2	5	2		1	80	0	2	1	1	2	2	2	3	2	2	2	1	1	5	5	3	3	5	4	3	4	2	3	2	2
2021-07-11 20:59:39	2021-07-11 21:32:46	100	1	1	32	159	50	12	2	2	#NULL!	1	2	1	1	3	5	2	1	8	2		3	#NULL!	0	4	1	3	3	3	3	3	3	2	4	3	2	5	5	5	2	2	5	5	5	2	1	3	2
2021-07-11 22:28:44	2021-07-11 22:38:25	100	1	1	21	167	51	12	2	2	#NULL!	1	1	1	3	3	3	2	2	8	2		3	#NULL!	0	3	1	1	1	2	2	2	2	1	2	1	1	5	5	3	5	5	5	5	5	4	4	2	2
2021-07-11 23:05:02	2021-07-12 00:03:49	100	1	1	26	157	42	15	2	2	#NULL!	1	2	1	4	3	3	2	2	8	2		3	#NULL!	0	4	1	1	4	3	4	2	3	1	5	1	1	5	1	5	4	3	5	5	5	3	1	3	2
2021-07-12 00:53:19	2021-07-12 01:06:06	100	1	1	29	165	57	17	2	2	#NULL!	1	2	5	3	3	3	2	1	5	2		4	12	0	3	2	2	2	3	3	2	3	3	3	1	2	5	5	1	4	4	5	3	5	2	3	3	2
2021-07-12 15:55:15	2021-07-12 16:07:37	100	1	1	25	158	58	17	2	2	#NULL!	1	2	1	4	3	3	2	2	8	2		3	#NULL!	0	4	2	1	3	2	4	3	3	1	3	1	1	5	4	2	4	4	5	3	2	3	3	2	2
2021-07-12 17:28:14	2021-07-12 17:42:22	100	1	1	29	150	47	15	2	2	#NULL!	1	2	1	3	3	4	2	1	2	1	Obesity	2	0	1	5	3	5	5	5	5	4	4	5	5	2	4	5	5	3	5	5	5	4	5	4	4	5	2
2021-07-12 21:39:15	2021-07-12 21:53:49	100	1	1	24	156	80	14	2	2	#NULL!	1	2	1	4	3	3	2	2	8	2		4	35	1	5	1	1	1	2	4	1	3	1	3	1	1	4	3	1	2	4	3	5	4	4	5	2	2
2021-07-12 23:35:18	2021-07-12 23:42:29	100	1	1	27	160	63	16	2	2	#NULL!	1	2	1	3	3	3	2	2	8	2		3	#NULL!	0	2	1	1	1	3	1	4	2	2	3	1	2	5	2	2	1	2	1	3	5	2	3	2	1
2021-07-13 01:27:58	2021-07-13 01:43:29	100	1	1	32	162	78	17	2	2	#NULL!	1	2	1	1	3	3	2	2	8	2		3	#NULL!	0	4	1	3	3	2	3	2	2	3	3	1	1	5	3	1	3	2	5	3	1	2	1	1	2
2021-07-13 01:49:32	2021-07-13 02:00:22	100	1	1	25	163	82	15	2	2	#NULL!	1	2	1	3	3	3	2	2	9	2		4	60	0	5	1	1	4	5	3	5	3	2	3	1	1	5	5	5	5	1	5	5	5	1	3	1	2
2021-07-13 15:47:03	2021-07-13 15:59:06	100	1	1	26	156	47	12	2	2	2000	4	2	5	4	3	4	2	1	2	1	IBS	1	40	1	3	1	5	2	4	5	5	3	5	3	1	3	5	5	5	5	1	5	4	5	4	1	3	3
2021-07-13 17:59:47	2021-07-13 18:10:23	100	1	1	38	160	56	18	2	2	#NULL!	1	2	1	1	3	3	2	2	8	2		3	#NULL!	0	3	1	1	3	3	3	1	3	1	2	1	1	5	3	3	3	2	2	2	4	1	1	1	2
2021-07-15 21:32:23	2021-07-15 22:10:18	100	1	1	48	163	84	12	2	2	2021	1	2	5	1	3	3	1	1	1	1	ADHD	1	83	1	3	1	#NULL!	3	1	3	2	3	1	3	3	3	5	5	3	5	4	5	5	5	2	3	4	4
2021-07-18 16:21:53	2021-07-18 16:35:13	100	1	1	26	165	75	16	2	2	#NULL!	1	2	1	3	3	3	2	1	3	1	fybromialgia	4	50	1	5	1	2	2	3	3	2	1	2	4	1	1	5	5	2	1	1	5	3	5	3	2	2	3
2021-07-18 17:01:15	2021-07-18 17:09:11	100	1	1	31	168	60	17	2	2	#NULL!	1	1	1	1	3	3	2	2	8	2		3	#NULL!	0	3	1	2	3	3	3	3	3	2	3	1	1	5	4	2	1	2	4	3	5	4	2	2	1
2021-07-18 17:55:08	2021-07-18 18:11:10	100	1	1	29	171	50	16	2	2	#NULL!	1	2	1	1	3	3	2	1	9	2		4	65	1	3	2	3	4	4	4	3	3	2	3	1	2	5	5	4	3	5	3	5	5	4	4	3	2
2021-07-18 18:19:50	2021-07-18 18:36:53	100	1	1	27	173	50	17	2	2	#NULL!	1	5	1	3	3	3	3	1	1	1	SPD, ADHD, Anorexia Nervosa CPTSD	2	97	0	5	2	5	4	4	3	4	3	4	4	3	2	5	5	5	5	4	5	5	5	5	4	3	3
2021-07-18 19:18:37	2021-07-18 19:29:54	100	1	1	22	167	60	13	2	2	1948	1	2	1	4	3	3	2	2	5	2		2	#NULL!	1	5	1	1	4	4	4	2	4	1	4	1	1	5	5	4	5	5	5	5	5	5	4	2	2
2021-07-18 19:32:03	2021-07-18 19:53:05	100	1	1	23	159	59	14	2	2	#NULL!	1	3	1	4	3	3	2	2	4	2		1	14	0	5	1	2	2	2	2	2	2	2	2	1	2	5	5	1	5	1	1	4	3	3	1	2	1
2021-07-18 20:03:18	2021-07-18 20:21:30	100	1	1	26	161	48	14	2	2	#NULL!	1	2	1	1	3	4	2	2	8	2		3	#NULL!	0	4	1	2	2	2	2	3	2	2	3	1	2	5	5	3	1	3	5	5	5	2	1	2	2
2021-07-18 21:22:28	2021-07-18 21:35:03	100	1	1	#NULL!	165	85	12	2	2	#NULL!	1	2	1	4	3	3	2	1	8	2		3	#NULL!	1	4	3	3	3	4	2	3	2	3	3	3	4	5	3	3	5	3	4	4	5	2	2	3	2
2021-07-19 00:29:28	2021-07-19 00:49:30	100	1	1	22	174	62	13	2	2	#NULL!	1	3	1	3	3	3	2	2	8	2		#NULL!	#NULL!	0	4	1	1	4	2	5	4	2	3	2	1	1	5	4	3	2	2	5	5	5	2	1	1	4
2021-07-19 08:14:29	2021-07-19 08:27:04	100	1	1	35	165	66	19	2	2	#NULL!	1	2	5	3	3	3	2	2	5	2		3	#NULL!	1	4	1	1	3	4	3	3	3	3	3	2	2	5	5	5	5	5	4	5	5	3	3	3	4
2021-07-19 09:55:18	2021-07-19 10:05:58	100	1	1	26	157	50	15	2	2	#NULL!	1	1	1	4	3	3	2	2	8	2		3	#NULL!	0	4	2	3	3	4	3	3	3	2	3	1	3	3	3	3	2	4	1	5	5	1	1	3	1
2021-07-13 10:44:17	2021-07-19 11:41:34	100	1	1	28	160	65	15	2	2	#NULL!	1	2	1	4	3	3	2	2	1	1	Asthma	1	13	1	4	1	1	3	2	4	2	4	1	4	2	2	5	4	4	5	3	5	5	5	2	4	1	4
2021-07-15 23:35:20	2021-07-15 23:45:59	100	1	1	19	158	93	12	3	2	#NULL!	1	5	1	4	3	3	2	1	7	2		1	20	1	4	2	3	5	4	5	2	4	4	5	3	2	1	5	1	4	5	2	5	5	3	1	4	2
2021-07-11 17:16:53	2021-07-11 17:29:15	100	1	1	30	178	73	14	1	2	#NULL!	1	3	1	1	4	1	2	2	1	2		2	#NULL!	0	2	1	2	1	1	2	1	1	1	2	#NULL!	1	3	3	3	3	3	1	3	4	3	1	1	1
2021-07-11 17:30:25	2021-07-11 17:45:40	100	1	1	29	184	94	12	1	2	#NULL!	1	3	1	1	4	#NULL!	2	2	1	2		2	#NULL!	1	5	1	3	2	4	4	4	4	4	3	3	4	5	4	5	5	5	3	1	5	2	2	3	4
2021-07-11 18:26:07	2021-07-11 18:42:35	100	1	1	33	178	85	15	1	2	#NULL!	1	4	1	1	4	1	2	2	8	1	Asthma and dust mite allergy	1	51	1	5	1	3	5	3	1	2	2	3	3	3	2	1	5	5	3	5	3	5	5	1	#NULL!	2	1
2021-07-11 20:05:36	2021-07-11 20:17:36	100	1	1	31	175	83	12	1	2	#NULL!	1	1	1	1	4	1	2	2	8	2		3	#NULL!	1	3	1	2	3	3	3	3	2	2	2	1	1	4	2	1	1	2	2	2	5	2	2	2	2
2021-07-11 21:42:37	2021-07-11 21:57:07	100	1	1	34	176	73	14	1	2	#NULL!	1	3	1	2	4	1	2	2	9	2		3	#NULL!	1	3	2	2	4	1	3	5	3	3	3	2	1	3	5	3	5	5	3	5	5	2	3	1	3
2021-07-11 21:46:52	2021-07-11 22:00:36	100	1	1	30	178	73	16	1	2	#NULL!	1	3	1	3	4	#NULL!	2	2	3	1	childhood asthma	2	#NULL!	1	5	4	2	1	2	5	3	3	2	4	3	3	3	3	2	5	2	5	5	5	2	3	3	2
2021-07-12 17:09:50	2021-07-12 17:32:20	100	1	1	29	186	100	18	1	2	#NULL!	1	1	1	1	4	1	2	2	9	2		3	#NULL!	1	5	1	1	5	3	4	3	3	2	4	3	2	1	3	2	1	5	3	5	5	1	3	2	3
2021-07-12 18:52:48	2021-07-12 19:09:40	100	1	1	28	181	75	17	1	2	#NULL!	1	3	1	1	4	1	2	2	8	2		3	#NULL!	1	3	1	2	1	2	2	1	2	1	2	1	1	3	2	1	3	1	1	3	2	2	2	1	1
2021-07-12 19:57:40	2021-07-12 20:12:12	100	1	1	26	167	70	15	1	2	#NULL!	1	1	1	1	4	1	2	2	2	2		2	#NULL!	1	2	1	2	2	2	1	2	3	2	3	3	2	1	2	1	1	1	1	1	2	4	1	2	2
2021-07-12 19:55:48	2021-07-12 20:17:30	100	1	1	33	184	132	17	1	1	1996	2	3	1	1	4	1	3	1	1	1	ADD	2	#NULL!	1	4	2	1	4	5	5	4	3	3	3	5	2	1	3	1	1	2	5	4	5	1	2	2	1
2021-07-12 22:18:58	2021-07-12 22:29:38	100	1	1	33	170	92	18	1	2	#NULL!	1	1	1	1	4	1	2	2	8	2		3	#NULL!	1	4	1	1	2	4	3	2	2	2	3	1	1	3	3	1	3	5	1	5	5	2	1	1	1
2021-07-12 22:52:06	2021-07-12 23:02:26	100	1	1	34	168	92	17	1	2	#NULL!	1	1	1	1	4	1	2	2	1	2		1	73	1	5	5	1	5	3	3	1	2	1	4	1	1	1	5	5	1	5	1	1	5	2	4	1	1
2021-07-12 23:29:05	2021-07-12 23:45:28	100	1	1	29	170	77	16	1	2	#NULL!	1	3	1	3	4	1	1	1	5	2		3	#NULL!	1	4	1	3	1	3	3	4	3	3	4	4	2	4	3	3	4	3	5	3	5	3	3	3	2
2021-07-13 10:03:15	2021-07-13 10:25:28	100	1	1	31	197	95	17	1	2	#NULL!	1	2	1	3	4	4	3	2	4	2		2	#NULL!	1	4	1	2	3	3	3	2	3	2	3	1	1	5	2	3	1	1	5	2	5	3	3	3	2
2021-07-13 10:25:57	2021-07-13 10:34:50	100	1	1	23	175	64	13	1	2	#NULL!	1	1	1	3	4	4	2	2	8	2		3	#NULL!	0	5	2	1	1	4	4	3	2	2	2	1	1	3	5	3	4	2	4	3	5	3	2	2	4
2021-07-13 11:12:57	2021-07-13 11:23:43	100	1	1	49	178	88	20	1	2	#NULL!	1	1	1	1	4	5	2	2	8	2		3	#NULL!	0	2	1	1	1	2	2	2	2	1	2	1	1	1	1	1	1	2	1	2	3	1	1	1	1
2021-07-13 11:33:36	2021-07-13 11:42:12	100	1	1	23	185	150	13	1	2	#NULL!	1	1	1	3	4	1	2	2	8	2		#NULL!	#NULL!	0	5	1	2	2	4	2	1	4	2	5	3	2	3	5	1	3	1	1	2	5	1	1	2	2
2021-07-13 17:58:26	2021-07-13 18:08:09	100	1	1	28	171	59	15	1	2	#NULL!	1	1	1	4	4	4	2	2	7	2		2	0	0	4	1	1	3	3	3	2	3	2	3	#NULL!	1	1	4	4	3	2	1	3	5	3	2	2	1
2021-07-13 19:49:55	2021-07-13 20:22:26	100	1	1	24	175	75	14	1	2	#NULL!	1	1	1	4	4	4	2	2	8	2		3	0	1	4	1	1	5	4	2	5	2	2	3	2	1	5	3	1	2	1	3	5	5	2	3	2	1
2021-07-14 10:38:16	2021-07-14 10:52:33	100	1	1	32	176	70	18	1	2	#NULL!	1	1	1	3	4	1	2	2	8	2		3	#NULL!	1	5	1	1	4	3	1	1	5	1	4	1	3	4	5	1	5	4	1	5	5	4	4	3	1
2021-07-14 11:26:48	2021-07-14 11:43:32	100	1	1	29	170	74	17	1	2	#NULL!	1	1	1	4	4	4	3	2	8	2		3	#NULL!	1	4	1	2	4	4	3	2	3	1	3	2	3	1	4	4	4	5	1	4	4	3	3	3	2
2021-07-16 13:44:15	2021-07-16 13:59:41	100	1	1	22	188	120	14	1	2	#NULL!	1	1	1	3	4	1	2	2	9	2		3	#NULL!	1	4	2	1	4	5	4	3	4	2	4	1	1	5	3	1	2	2	1	5	5	5	3	4	3
2021-07-16 16:32:09	2021-07-16 16:46:26	100	1	1	22	171	65	12	1	2	1948	1	3	1	4	4	1	1	3	8	2		3	#NULL!	1	3	2	5	4	5	3	5	3	4	3	1	2	3	5	4	5	1	3	5	5	2	4	3	5
2021-07-17 01:17:39	2021-07-17 01:31:51	100	1	1	25	176	71	13	1	2	#NULL!	1	3	1	3	4	1	2	2	8	2		3	0	1	5	1	1	2	2	1	2	2	2	3	1	1	5	5	4	2	5	1	5	5	1	4	1	1
2021-07-18 00:57:29	2021-07-18 01:08:35	100	1	1	26	177	70	15	1	2	#NULL!	1	1	1	1	4	1	2	2	4	1	Asthma	2	#NULL!	0	4	1	1	1	2	3	3	2	1	3	1	1	5	5	4	5	3	2	5	5	4	1	2	1
2021-07-18 16:16:17	2021-07-18 16:27:43	100	1	1	26	185	104	14	1	2	#NULL!	1	2	1	4	4	1	2	2	4	1	Asthma	1	20	1	5	1	1	2	2	2	4	2	2	3	4	4	4	3	2	5	5	1	4	5	2	3	2	3
2021-07-18 16:23:33	2021-07-18 16:34:12	100	1	1	22	186	88	13	1	2	#NULL!	1	1	1	3	4	1	2	2	1	2		3	0	1	5	1	3	2	4	5	5	4	4	5	4	5	5	3	2	5	5	5	5	5	3	4	3	4
2021-07-18 16:26:38	2021-07-18 16:38:20	100	1	1	27	162	57	12	1	2	#NULL!	1	1	1	1	4	1	2	2	8	2		3	0	1	4	1	1	2	2	2	2	2	2	2	1	1	3	3	1	2	3	2	3	5	1	1	1	1
2021-07-18 17:56:06	2021-07-18 18:23:52	100	1	1	27	183	75	16	1	2	#NULL!	1	1	1	1	4	1	2	2	8	2		3	#NULL!	1	3	1	1	3	2	3	1	3	2	3	1	1	2	1	1	1	2	1	2	5	3	4	3	1
2021-07-18 18:25:19	2021-07-18 18:36:27	100	1	1	24	179	94	14	1	2	#NULL!	1	1	1	3	4	4	2	2	1	1	Asthma small kidney	1	0	1	5	2	3	5	3	5	5	5	3	5	2	2	5	4	4	5	5	3	5	5	5	5	3	3
2021-07-18 19:39:07	2021-07-18 20:02:06	100	1	1	67	175	76	18	1	1	1978	6	1	1	1	4	1	2	2	4	2		2	#NULL!	0	4	1	1	2	2	1	2	1	1	2	1	1	4	2	2	1	1	2	1	4	2	1	1	1
2021-07-18 19:21:08	2021-07-18 21:04:53	100	1	1	29	183	65	15	1	2	#NULL!	1	1	1	1	4	4	2	1	8	2		3	#NULL!	1	4	1	1	3	3	4	2	3	1	4	4	4	5	5	1	5	#NULL!	2	5	5	3	3	3	1
2021-07-18 21:58:47	2021-07-18 22:17:21	100	1	1	46	179	72	15	1	2	#NULL!	1	1	1	1	4	4	2	1	8	2		4	#NULL!	1	5	1	1	4	1	3	2	3	1	3	1	3	1	1	2	1	3	5	3	3	4	5	1	1
2021-07-19 00:52:49	2021-07-19 01:00:26	100	1	1	24	172	69	14	1	2	#NULL!	1	1	1	3	4	1	2	2	4	1	Asthma	2	0	1	4	2	2	4	4	5	3	3	3	4	1	1	4	2	2	4	5	5	5	4	3	4	4	5
2021-07-19 00:50:06	2021-07-19 01:25:10	100	1	1	25	184	78	12	1	2	#NULL!	1	2	1	4	4	4	2	2	3	2		2	#NULL!	1	5	1	1	2	4	4	2	3	3	5	2	1	5	2	5	4	5	5	5	5	3	5	4	5
2021-07-19 01:25:10	2021-07-19 01:33:05	100	1	1	26	170	58	12	1	2	#NULL!	1	3	1	4	4	1	2	2	8	2		3	#NULL!	0	5	2	3	3	4	4	4	4	2	3	2	2	5	4	5	5	5	5	3	5	3	2	2	3
2021-07-19 01:41:20	2021-07-19 02:03:00	100	1	1	27	165	85	15	1	2	#NULL!	2	1	1	3	4	1	2	2	1	2		3	#NULL!	1	4	1	1	2	3	2	3	2	1	3	1	2	3	3	2	2	3	4	3	2	3	3	2	2
2021-07-19 03:24:33	2021-07-19 03:35:54	100	1	1	27	186	126	15	1	2	#NULL!	1	1	1	3	4	1	2	2	1	2		3	#NULL!	0	3	2	2	3	3	2	2	2	2	3	2	2	1	5	4	2	2	2	4	5	2	1	1	2
2021-07-19 08:43:56	2021-07-19 08:55:23	100	1	1	24	173	76	12	1	2	1948	1	2	1	3	4	4	2	2	8	2		3	#NULL!	1	5	2	3	2	3	4	4	3	2	4	1	1	5	2	5	5	5	5	5	5	4	4	5	5
2021-07-19 07:55:04	2021-07-19 15:04:57	100	1	1	23	170	65	12	1	2	#NULL!	1	1	1	3	4	4	2	2	8	2		3	0	1	5	2	2	2	2	1	2	4	1	4	3	3	5	3	2	4	5	3	5	5	2	3	2	3
2021-07-11 18:13:25	2021-07-11 18:25:46	100	1	1	24	174	70	13	2	2	#NULL!	2	1	1	3	4	1	2	2	#NULL!	1	IBS	1	42	0	3	2	3	3	3	4	3	3	5	3	3	3	5	5	4	3	5	3	5	5	3	3	3	3
2021-07-11 17:49:37	2021-07-11 18:26:09	100	1	1	24	161	51	15	2	2	#NULL!	1	1	1	1	4	1	2	3	2	1	helicobacter	1	11	1	4	2	2	3	4	3	4	2	3	3	2	2	5	4	2	4	4	5	4	5	3	2	3	3
2021-07-11 18:22:09	2021-07-11 18:40:34	100	1	1	48	175	72	17	2	2	#NULL!	1	1	1	1	4	1	2	2	8	2		3	#NULL!	0	5	3	2	3	3	2	2	2	3	4	1	1	4	5	5	5	5	3	5	5	4	3	4	5
2021-07-11 18:28:58	2021-07-11 18:52:43	100	1	1	30	159	51	16	2	2	#NULL!	2	3	1	1	4	1	2	2	8	2		3	#NULL!	0	5	1	1	3	1	2	1	2	1	2	1	1	5	3	5	3	4	4	1	2	3	1	1	1
2021-07-11 18:37:15	2021-07-11 18:54:30	100	1	1	54	173	106	16	2	2	#NULL!	1	1	1	1	4	1	2	2	8	2		4	62	0	5	2	1	3	5	5	1	4	3	4	1	4	5	5	4	4	5	#NULL!	5	5	4	1	2	5
2021-07-11 19:02:04	2021-07-11 19:17:16	100	1	1	57	160	53	12	2	2	#NULL!	1	2	1	1	4	4	2	2	8	2		3	#NULL!	0	5	5	3	#NULL!	5	5	3	4	3	4	3	1	5	5	5	5	4	4	4	5	4	5	3	1
2021-07-11 19:11:10	2021-07-11 19:26:46	100	1	1	32	166	55	18	2	2	#NULL!	2	4	1	1	4	1	2	2	8	2		3	#NULL!	1	5	3	3	4	4	4	3	3	2	4	1	1	5	5	5	5	5	5	5	5	4	4	1	5
2021-07-11 19:19:36	2021-07-11 19:32:51	100	1	1	28	157	43	15	2	2	#NULL!	1	3	1	4	4	#NULL!	2	2	8	2		3	#NULL!	1	4	1	1	4	3	5	2	3	1	2	1	1	5	5	4	4	5	4	4	5	3	2	2	3
2021-07-11 19:24:27	2021-07-11 19:41:35	100	1	1	30	157	52	15	2	2	#NULL!	1	3	1	1	4	1	2	2	8	2		3	#NULL!	1	5	1	1	3	1	3	2	2	1	2	1	1	5	5	5	5	5	4	5	5	2	1	2	5
2021-07-11 19:35:04	2021-07-11 19:46:34	100	1	1	26	159	49	15	2	2	#NULL!	1	3	1	1	4	1	2	2	1	2		#NULL!	#NULL!	0	5	1	2	2	3	3	3	1	3	1	1	1	5	5	5	5	#NULL!	3	5	5	5	3	1	5
2021-07-11 20:42:17	2021-07-11 20:51:56	100	1	1	27	166	57	15	2	2	#NULL!	1	3	1	3	4	1	2	1	7	1	migraine	1	60	0	5	1	1	2	2	2	1	2	1	2	1	1	5	5	5	3	5	2	5	5	2	1	2	3
2021-07-11 20:44:06	2021-07-11 20:59:24	100	1	1	31	158	49	15	2	2	#NULL!	1	1	1	1	4	1	1	1	9	2		3	#NULL!	0	3	3	3	3	4	4	4	4	4	3	2	1	2	5	2	5	2	1	2	5	2	2	1	2
2021-07-11 20:31:48	2021-07-11 21:14:15	100	1	1	29	160	80	12	2	2	#NULL!	1	2	1	1	4	4	2	2	8	2		3	#NULL!	0	5	1	5	5	2	3	5	3	3	3	1	1	5	5	4	5	5	4	5	5	3	3	2	3
2021-07-11 21:20:42	2021-07-11 21:31:35	100	1	1	39	170	63	15	2	2	#NULL!	1	2	1	3	4	1	2	2	8	2		4	#NULL!	0	5	1	1	1	3	3	3	2	2	3	2	1	5	5	2	3	2	3	5	5	3	2	2	3
2021-07-11 21:47:43	2021-07-11 21:58:11	100	1	1	32	162	49	15	2	2	#NULL!	1	3	1	3	4	1	2	2	8	2		3	#NULL!	1	3	1	4	2	4	4	4	2	3	3	2	4	5	3	3	1	4	5	5	5	4	4	2	2
2021-07-11 22:55:33	2021-07-11 23:10:52	100	1	1	62	168	58	13	2	2	#NULL!	6	1	1	1	4	1	2	2	1	2		4	35	0	3	2	4	2	2	4	3	2	4	3	1	2	5	5	4	3	3	4	3	5	2	2	3	3
2021-07-11 23:49:17	2021-07-11 23:59:22	100	1	1	29	163	63	17	2	2	#NULL!	1	2	1	4	4	1	2	2	3	2		2	0	1	3	1	2	3	4	5	3	4	5	4	1	1	5	4	2	4	4	3	1	5	2	1	1	2
2021-07-12 00:27:29	2021-07-12 00:42:26	100	1	1	24	150	54	15	2	2	#NULL!	1	2	1	3	4	1	2	2	8	2		3	#NULL!	1	4	1	2	2	4	5	5	2	1	4	1	1	5	4	2	5	1	5	5	3	1	5	2	3
2021-07-12 00:31:24	2021-07-12 00:42:29	100	1	1	26	157	55	12	2	2	#NULL!	1	3	1	4	4	1	2	2	8	2		3	#NULL!	0	4	1	3	2	3	3	3	3	3	3	1	1	5	4	3	5	4	4	3	5	4	4	2	3
2021-07-11 18:28:38	2021-07-12 00:56:31	100	1	1	25	160	51	12	2	2	#NULL!	1	3	1	3	4	1	2	2	8	1	endometriosis	4	10	0	3	1	1	3	4	3	3	3	3	3	2	2	1	3	4	1	2	1	3	5	3	1	3	3
2021-07-11 18:54:42	2021-07-12 01:22:34	100	1	1	22	166	95	#NULL!	2	2	#NULL!	1	5	1	3	4	1	2	2	9	1	hypo-thyrodism	4	1	0	5	1	2	4	4	4	2	3	4	4	1	1	3	5	2	4	2	1	5	3	2	4	2	2
2021-07-11 22:10:55	2021-07-12 01:32:03	100	1	1	23	150	45	15	2	2	#NULL!	1	3	1	1	4	4	2	2	8	2		3	#NULL!	1	5	2	3	5	5	5	2	4	3	4	2	1	5	5	5	5	5	3	5	5	3	3	3	3
2021-07-12 04:40:57	2021-07-12 05:01:08	100	1	1	36	164	76	23	2	2	#NULL!	1	2	1	1	4	1	2	2	8	2		3	#NULL!	1	2	1	1	2	1	3	3	3	2	3	1	1	4	2	3	1	2	3	4	3	1	3	#NULL!	2
2021-07-12 04:53:55	2021-07-12 05:04:20	100	1	1	27	151	56	15	2	2	1948	1	3	1	1	4	1	2	2	8	2		3	#NULL!	1	5	3	4	3	4	2	5	3	3	4	2	4	5	5	5	5	3	5	5	5	5	5	2	4
2021-07-12 07:26:57	2021-07-12 08:24:01	100	1	1	55	152	41	20	2	1	1989	6	3	1	2	4	1	2	1	7	1	Medullary sponge kidney	2	#NULL!	0	1	1	1	1	1	1	3	1	2	2	2	4	1	2	2	1	1	1	1	1	5	5	3	2
2021-07-12 08:35:20	2021-07-12 09:05:04	100	1	1	33	160	50	15	2	2	#NULL!	1	5	1	1	4	5	3	2	1	2		1	40	0	4	1	3	3	3	3	2	3	3	3	2	3	4	4	3	4	4	2	2	4	3	3	2	4
2021-07-12 10:10:44	2021-07-12 10:22:39	100	1	1	28	157	50	15	2	2	#NULL!	1	3	1	4	4	2	2	1	8	2		3	#NULL!	1	5	4	5	5	5	5	5	5	5	5	4	4	5	5	5	5	5	5	5	5	4	1	5	5
2021-07-12 00:30:24	2021-07-12 11:30:13	100	1	1	35	155	77	12	2	2	#NULL!	1	3	1	1	4	1	2	2	8	2		3	#NULL!	0	5	1	3	4	5	5	5	3	5	3	3	3	5	5	4	5	4	5	3	5	1	1	1	5
2021-07-12 13:46:55	2021-07-12 13:59:07	100	1	1	26	159	56	15	2	2	#NULL!	1	1	1	3	4	1	2	2	8	2		#NULL!	#NULL!	1	3	1	1	2	2	1	2	2	2	3	1	1	3	5	2	3	4	1	3	4	1	2	1	3
2021-07-11 17:55:42	2021-07-12 14:06:49	100	1	1	27	154	70	18	2	1	2012	6	1	1	3	4	1	2	3	7	2		2	#NULL!	0	2	2	3	3	3	4	3	3	4	5	1	1	4	4	3	2	5	1	5	5	2	1	1	1
2021-07-12 12:04:54	2021-07-12 14:12:12	100	1	1	25	0	0	17	2	2	#NULL!	1	1	1	1	4	1	2	2	8	2		3	#NULL!	1	5	1	1	3	4	3	1	2	3	4	1	1	5	5	2	3	5	3	5	5	3	2	2	2
2021-07-12 14:05:29	2021-07-12 14:20:09	100	1	1	29	164	60	16	2	2	#NULL!	1	2	1	3	4	1	2	2	7	2		1	2	0	5	2	1	3	3	4	1	2	2	2	1	2	4	4	3	1	5	2	5	5	1	2	3	5
2021-07-12 14:30:38	2021-07-12 14:49:25	100	1	1	28	168	56	17	2	2	#NULL!	1	1	1	3	4	1	2	2	1	2		3	#NULL!	1	3	1	2	4	2	3	2	4	3	3	1	2	4	4	4	3	3	2	1	5	3	3	3	2
2021-07-12 14:23:03	2021-07-12 14:52:19	100	1	1	22	150	73	17	2	1	2021	2	4	1	3	4	1	2	2	8	2		3	#NULL!	1	4	2	3	4	3	3	5	4	2	4	3	2	5	3	4	5	5	5	5	5	3	5	3	4
2021-07-12 14:59:54	2021-07-12 15:17:34	100	1	1	48	162	56	16	2	2	#NULL!	1	3	1	2	4	1	2	2	8	2		4	83	0	5	1	1	1	2	3	1	2	1	2	1	2	1	3	2	1	1	1	1	2	1	1	1	1
2021-07-12 15:10:33	2021-07-12 15:20:37	100	1	1	26	156	53	16	2	1	2019	2	1	1	3	4	1	2	2	5	2		2	#NULL!	1	5	2	2	3	5	5	3	5	4	5	5	5	5	2	1	4	4	5	5	5	4	5	5	5
2021-07-12 18:33:09	2021-07-12 18:46:27	100	1	1	37	161	50	18	2	2	#NULL!	1	1	1	1	4	1	2	2	8	2		3	#NULL!	0	3	1	2	3	2	2	2	2	3	2	2	2	3	4	2	3	1	1	2	5	2	1	3	1
2021-07-12 21:35:21	2021-07-12 21:51:14	100	1	1	27	0	0	17	2	2	#NULL!	1	1	1	1	4	4	2	2	4	1	hypo-thyrodism, asthma	1	21	1	3	2	3	3	4	3	2	3	4	4	3	4	4	5	2	2	5	2	5	5	3	2	1	3
2021-07-12 22:26:27	2021-07-12 22:38:33	100	1	1	32	167	59	17	2	2	#NULL!	1	3	1	1	4	5	2	1	1	1	eating disorders	2	#NULL!	0	2	1	1	2	2	5	4	2	3	2	2	2	1	4	2	2	3	1	3	5	2	1	2	2
2021-07-12 22:41:07	2021-07-12 23:13:50	100	1	1	27	159	64	12	2	2	#NULL!	1	1	1	3	4	#NULL!	2	2	9	2		#NULL!	#NULL!	1	3	1	4	3	3	4	4	3	3	4	2	3	5	2	1	2	3	4	4	3	2	2	1	1
2021-07-12 23:20:07	2021-07-12 23:34:14	100	1	1	29	148	50	17	2	2	#NULL!	1	3	1	4	4	4	2	3	9	2		3	0	1	4	2	2	3	4	3	3	3	2	3	2	2	5	4	3	5	2	5	5	5	3	3	2	1
2021-07-12 23:17:18	2021-07-12 23:49:10	100	1	1	35	158	49	18	2	1	1997	2	3	1	1	4	1	2	2	8	2		3	#NULL!	0	4	1	3	2	2	3	5	2	2	2	1	#NULL!	1	4	1	2	3	1	3	2	1	4	1	1
2021-07-12 23:41:44	2021-07-12 23:51:36	100	1	1	32	162	67	17	2	2	#NULL!	1	1	1	1	4	1	2	2	4	2		2	#NULL!	0	5	1	2	2	2	2	2	3	3	3	2	2	2	2	2	2	1	2	1	3	1	1	1	1
2021-07-13 01:57:51	2021-07-13 02:09:54	100	1	1	23	163	49	14	2	2	#NULL!	1	1	1	3	4	1	2	2	8	2		3	0	0	2	1	1	3	3	3	3	2	2	3	1	1	1	3	3	2	4	1	4	5	2	1	2	3
2021-07-13 09:52:27	2021-07-13 10:04:32	100	1	1	27	171	103	18	2	2	#NULL!	1	1	1	3	4	4	2	2	8	2		3	#NULL!	1	4	1	2	3	2	3	4	2	2	4	2	2	5	4	2	3	4	4	4	5	2	5	4	3
2021-07-13 11:25:10	2021-07-13 11:35:56	100	1	1	21	158	47	14	2	2	#NULL!	1	1	1	3	4	3	2	2	8	1		#NULL!	#NULL!	#NULL!	5	2	4	4	5	4	4	5	4	5	4	3	5	5	5	4	4	5	5	5	4	4	4	3
2021-07-13 13:04:29	2021-07-13 13:15:23	100	1	1	21	159	66	12	2	2	#NULL!	1	1	1	3	4	4	1	1	2	1	IBS asthma	1	30	1	4	1	4	3	4	2	5	3	3	4	3	3	5	4	4	3	3	5	5	5	3	4	2	4
2021-07-13 15:52:16	2021-07-13 16:03:31	100	1	1	26	173	59	18	2	2	#NULL!	1	3	1	3	4	1	2	2	8	2		3	#NULL!	1	5	1	4	3	1	5	5	3	1	5	1	3	4	5	4	5	1	5	5	5	4	5	3	3
2021-07-13 18:54:03	2021-07-13 19:08:12	100	1	1	18	163	56	13	2	2	#NULL!	1	1	1	3	4	1	2	1	8	2		3	#NULL!	1	5	5	4	4	5	5	4	5	2	5	2	3	5	5	5	5	5	2	5	5	5	5	5	3
2021-07-13 19:08:43	2021-07-13 19:21:22	100	1	1	19	157	55	#NULL!	2	2	#NULL!	1	1	1	3	4	4	2	2	8	2		3	#NULL!	1	5	2	1	5	3	4	2	5	1	5	4	3	2	4	4	5	5	2	4	5	3	2	2	1
2021-07-13 19:27:18	2021-07-13 19:34:45	100	1	1	27	165	70	18	2	2	#NULL!	1	3	1	2	4	1	2	1	8	2		3	#NULL!	0	2	1	1	1	2	2	1	1	1	2	1	1	3	4	3	4	4	5	5	5	5	3	1	2
2021-07-13 20:06:20	2021-07-13 20:24:45	100	1	1	22	157	46	14	2	2	#NULL!	1	3	1	4	4	4	2	1	#NULL!	2		3	#NULL!	1	5	3	2	4	4	2	4	4	3	5	3	4	5	5	5	5	5	5	5	5	5	5	2	5
2021-07-13 22:01:11	2021-07-13 22:10:31	100	1	1	26	173	57	16	2	2	#NULL!	1	3	1	3	4	5	2	2	8	2		3	#NULL!	0	3	2	1	2	3	2	3	3	2	2	1	2	5	3	2	3	1	2	2	4	3	2	2	3
2021-07-13 22:19:26	2021-07-13 22:36:04	100	1	1	25	156	74	14	2	2	#NULL!	1	3	1	3	4	1	2	2	8	2		3	#NULL!	0	4	1	2	2	2	5	2	3	2	2	1	2	5	4	3	4	4	3	3	5	2	3	1	2
2021-07-14 02:43:10	2021-07-14 02:56:42	100	1	1	35	168	96	23	2	2	#NULL!	1	1	1	3	4	1	2	2	8	2		4	#NULL!	0	4	1	3	3	4	4	4	4	2	3	2	2	5	5	1	2	2	4	2	5	2	3	1	1
2021-07-11 23:07:51	2021-07-14 11:30:02	100	1	1	24	157	55	16	2	2	#NULL!	2	1	1	1	4	4	2	2	8	1	hypo-thyrodism, asthma	4	2	1	4	2	4	3	3	3	4	3	3	3	2	3	3	2	1	2	1	3	3	5	4	4	2	3
2021-07-14 11:18:47	2021-07-14 11:31:58	100	1	1	22	154	67	12	2	2	#NULL!	1	1	1	3	4	4	2	3	8	2		3	#NULL!	1	5	1	3	3	3	4	3	3	3	4	2	3	5	3	2	3	5	3	5	5	2	5	3	3
2021-07-14 11:37:12	2021-07-14 11:47:31	100	1	1	23	157	35	12	2	2	1948	1	3	1	3	4	2	2	2	4	1	polycystic ovaries	1	30	0	2	1	2	3	3	2	3	2	1	3	2	3	3	5	2	4	3	1	4	5	3	1	2	3
2021-07-14 15:33:21	2021-07-14 15:53:15	100	1	1	27	160	54	17	2	2	#NULL!	1	3	1	4	4	1	2	3	9	2		4	#NULL!	0	2	1	1	3	2	1	4	2	2	2	1	1	3	5	1	1	1	4	1	5	1	3	3	2
2021-07-14 15:29:51	2021-07-14 16:05:52	100	1	1	19	158	48	#NULL!	2	2	#NULL!	1	1	1	3	4	1	2	3	5	1	depression, hypo-thyrodism, polycystic ovaries	1	20	1	4	3	4	4	4	2	5	4	5	3	5	4	4	4	4	4	4	4	5	5	3	4	4	4
2021-07-14 22:22:16	2021-07-14 22:34:45	100	1	1	23	158	63	15	2	2	#NULL!	1	1	1	3	4	1	1	2	1	2		2	#NULL!	1	3	3	2	3	3	5	5	4	2	3	1	2	5	4	3	4	5	2	4	5	4	5	2	4
2021-07-15 15:12:52	2021-07-15 15:32:05	100	1	1	23	167	54	12	2	2	#NULL!	1	2	1	3	4	4	2	2	8	2		3	0	1	5	1	5	4	2	3	5	3	5	5	1	2	5	5	5	5	2	1	3	5	3	4	1	1
2021-07-15 17:25:35	2021-07-15 18:00:40	100	1	1	67	158	66	15	2	2	#NULL!	1	3	1	1	4	1	2	2	8	2		3	#NULL!	0	2	1	#NULL!	1	1	1	1	1	2	1	1	1	1	3	3	1	1	2	3	3	3	2	2	3
2021-07-15 18:23:36	2021-07-15 18:40:44	100	1	1	26	162	60	15	2	2	#NULL!	1	3	1	3	4	1	2	2	1	2		1	60	0	3	1	1	2	3	3	4	2	1	2	1	1	4	5	3	2	1	3	4	4	1	1	1	1
2021-07-16 11:44:45	2021-07-16 12:09:35	100	1	1	29	162	53	22	2	1	1997	2	1	1	3	4	1	2	1	2	2	why is there no option of choosing everything?	2	0	0	4	1	1	2	3	1	1	2	1	2	1	1	1	2	1	5	1	5	5	1	1	4	1	1
2021-07-16 12:15:23	2021-07-16 12:26:32	100	1	1	23	149	49	15	2	2	#NULL!	1	1	1	3	4	1	2	2	8	2		3	#NULL!	0	4	1	3	4	4	3	2	4	3	4	1	3	5	3	4	5	1	3	4	5	3	5	1	3
2021-07-16 14:35:12	2021-07-16 14:49:05	100	1	1	21	168	53	14	2	2	#NULL!	1	1	1	4	4	1	2	2	8	2		4	40	1	4	2	3	2	2	4	4	2	4	3	2	4	4	4	3	2	4	1	2	5	2	2	2	4
2021-07-16 15:20:17	2021-07-16 15:32:53	100	1	1	22	162	55	13	2	2	#NULL!	1	3	1	4	4	1	2	2	8	2		3	#NULL!	0	5	1	3	3	4	4	4	3	3	5	1	2	5	5	5	5	5	5	5	5	2	2	2	2
2021-07-16 17:23:25	2021-07-16 17:37:01	100	1	1	26	167	113	15	2	2	#NULL!	1	3	1	3	4	#NULL!	2	2	8	1	hypo-thyrodism, asthma	1	46	0	3	1	3	2	2	2	5	2	4	2	1	1	5	5	4	3	3	2	4	5	4	2	2	4
2021-07-18 12:51:36	2021-07-18 13:03:03	100	1	1	21	174	62	12	2	2	#NULL!	1	1	1	3	4	1	2	2	8	2		3	#NULL!	1	4	1	2	3	4	2	4	3	4	3	1	1	5	4	1	#NULL!	2	2	5	5	3	3	2	4
2021-07-18 16:21:43	2021-07-18 16:30:18	100	1	1	26	157	58	16	2	2	#NULL!	1	1	1	1	4	1	2	2	8	2		3	0	0	3	1	2	2	2	2	2	3	1	2	1	1	5	5	4	5	3	4	5	5	1	1	1	2
2021-07-18 16:22:09	2021-07-18 16:32:02	100	1	1	27	167	61	17	2	1	1993	1	3	1	4	4	1	2	2	8	2		3	#NULL!	0	4	2	5	3	3	5	3	3	4	2	2	3	1	5	1	5	3	1	3	2	2	1	3	3
2021-07-18 16:25:41	2021-07-18 16:36:26	100	1	1	27	161	55	16	2	2	#NULL!	1	3	1	4	4	4	2	2	8	2		3	#NULL!	1	5	1	3	4	4	2	4	4	2	4	1	2	5	5	4	5	5	5	3	4	4	4	1	2
2021-07-18 16:29:01	2021-07-18 16:44:34	100	1	1	24	161	53	13	2	2	#NULL!	1	2	1	3	4	1	2	2	7	1		4	25	0	5	2	2	3	5	4	5	4	2	3	2	2	1	5	3	5	5	1	4	5	3	1	2	1
2021-07-18 16:37:36	2021-07-18 16:50:36	100	1	1	24	172	72	15	2	2	#NULL!	1	1	1	3	4	1	2	2	8	2		3	#NULL!	1	3	1	2	3	1	1	2	2	4	2	2	2	3	2	2	3	4	3	2	4	3	2	2	2
2021-07-18 16:37:58	2021-07-18 16:57:02	100	1	1	29	153	47	15	2	2	#NULL!	1	2	1	3	4	4	2	2	2	1	lactose sesitivity; endometriosis	1	10	1	5	3	2	4	4	5	2	4	2	5	3	3	4	3	2	4	4	3	5	5	4	4	3	3
2021-07-18 16:50:12	2021-07-18 16:59:22	100	1	1	24	162	54	12	2	2	#NULL!	1	1	1	1	4	2	2	2	8	1	Ulcerative collitis	4	75	1	5	1	1	5	3	3	4	4	4	5	3	2	5	2	3	4	1	1	5	5	5	5	1	3
2021-07-18 16:48:18	2021-07-18 17:01:04	100	1	1	26	164	50	12	2	2	#NULL!	1	1	1	3	4	4	1	2	7	1	autoimmune disease, vitiligo, anemia	1	4	1	4	1	2	3	4	5	4	4	2	4	2	2	4	4	2	5	5	5	4	5	2	3	2	4
2021-07-18 16:47:56	2021-07-18 17:02:20	100	1	1	46	176	76	18	2	2	1948	1	2	1	1	4	2	2	2	8	2		3	#NULL!	1	3	1	3	3	2	2	2	2	3	3	2	3	5	4	4	3	1	5	4	4	3	2	2	2
2021-07-18 16:49:49	2021-07-18 17:02:22	100	1	1	24	175	73	15	2	2	#NULL!	1	1	1	3	4	1	2	2	8	2		3	#NULL!	1	3	2	3	3	4	3	2	3	4	3	1	#NULL!	5	5	2	3	1	4	5	5	3	2	1	1
2021-07-18 17:02:18	2021-07-18 17:09:47	100	1	1	29	164	99	19	2	2	#NULL!	1	1	1	1	4	1	2	2	8	2		3	#NULL!	0	4	3	3	4	3	2	5	4	4	5	1	1	2	4	3	5	4	1	4	5	4	2	1	1
2021-07-18 17:08:11	2021-07-18 17:14:49	100	1	1	31	167	64	20	2	2	1948	1	4	1	1	4	1	2	2	8	2		3	#NULL!	1	4	1	1	3	4	2	4	2	3	3	2	3	3	5	3	3	4	1	5	5	2	2	1	1
2021-07-18 17:09:03	2021-07-18 17:17:32	100	1	1	22	165	57	12	2	2	#NULL!	1	2	1	3	4	1	2	2	8	2		3	#NULL!	0	5	1	4	1	4	3	4	3	4	5	3	4	5	3	2	2	3	3	3	5	4	4	2	1
2021-07-18 17:08:05	2021-07-18 17:22:42	100	1	1	33	167	67	17	2	2	1948	1	1	1	1	4	4	2	2	8	2		3	#NULL!	1	5	2	2	4	4	3	2	3	2	4	2	2	5	4	4	3	5	5	5	5	5	4	2	2
2021-07-18 17:09:07	2021-07-18 17:23:36	100	1	1	24	160	67	14	2	2	#NULL!	1	2	1	3	4	4	2	2	3	2		1	30	1	4	2	3	3	3	3	2	3	4	4	3	2	5	5	3	4	3	3	4	5	4	3	4	4
2021-07-18 17:12:22	2021-07-18 17:28:39	100	1	1	26	169	51	15	2	2	#NULL!	1	1	1	1	4	4	2	2	8	2		3	#NULL!	1	5	2	3	4	4	5	2	4	1	4	2	3	4	4	1	1	2	5	5	5	3	5	3	4
2021-07-18 17:27:00	2021-07-18 17:41:12	100	1	1	20	164	67	13	2	2	#NULL!	1	1	1	3	4	1	2	2	1	2		3	0	0	5	1	2	3	3	4	3	3	2	3	1	1	3	5	4	4	3	5	4	5	4	2	3	2
2021-07-18 17:42:37	2021-07-18 17:51:38	100	1	1	22	157	99	14	2	2	#NULL!	1	1	1	3	4	1	2	2	8	1	obesity	3	#NULL!	0	4	1	1	2	2	4	2	2	2	3	4	2	4	5	5	3	3	1	3	3	2	1	1	2
2021-07-18 17:48:51	2021-07-18 18:00:02	100	1	1	21	166	60	14	2	2	#NULL!	1	1	1	3	4	1	2	2	8	1	urticaria	4	40	1	3	2	2	2	4	4	4	3	2	3	2	2	5	4	2	5	5	5	5	5	3	3	2	4
2021-07-18 17:52:57	2021-07-18 18:10:06	100	1	1	23	160	63	12	2	2	#NULL!	1	2	1	3	4	4	2	2	8	2		3	#NULL!	0	5	1	2	3	3	3	2	3	3	4	1	3	5	5	4	5	4	4	5	5	4	3	3	4
2021-07-18 18:00:09	2021-07-18 18:11:37	100	1	1	28	160	52	17	2	2	#NULL!	1	1	1	1	4	1	2	2	8	2		#NULL!	#NULL!	0	5	1	4	3	2	3	4	2	4	4	1	1	5	4	4	3	5	3	4	5	2	1	1	2
2021-07-18 16:22:35	2021-07-18 18:20:39	100	1	1	32	157	63	15	2	2	#NULL!	1	3	1	3	4	1	2	2	1	1	ADD	1	40	0	5	1	2	3	2	3	4	2	3	4	2	2	5	3	4	2	3	4	5	5	2	2	2	2
2021-07-18 18:14:26	2021-07-18 18:29:08	100	1	1	21	159	48	12	2	2	#NULL!	1	1	1	3	4	4	2	2	8	2		3	#NULL!	0	4	1	2	3	3	4	3	4	3	4	1	2	1	5	2	5	4	1	3	5	3	2	1	3
2021-07-18 18:30:01	2021-07-18 18:42:19	100	1	1	27	158	59	17	2	2	1948	1	1	1	3	4	1	2	3	9	2		2	#NULL!	1	4	2	2	3	3	3	2	2	2	3	2	3	5	4	3	3	4	5	5	5	2	4	3	3
2021-07-18 18:20:06	2021-07-18 18:45:49	100	1	1	61	144	45	15	2	2	#NULL!	1	1	1	1	4	1	1	1	1	2		1	50	1	4	1	2	4	3	2	3	3	2	2	2	1	1	5	3	4	5	2	5	5	3	3	2	5
2021-07-18 18:32:10	2021-07-18 18:48:29	100	1	1	24	158	54	16	2	2	#NULL!	1	1	1	1	4	1	2	3	8	1	borderline personality disorder	4	65	0	5	4	3	4	4	3	3	3	4	5	3	3	5	3	1	2	4	5	5	5	3	2	2	5
2021-07-18 18:38:02	2021-07-18 18:49:21	100	1	1	33	162	48	17	2	2	#NULL!	1	1	1	3	4	1	2	2	8	1	dermititis	2	#NULL!	1	3	1	1	3	3	3	1	3	1	3	1	1	5	5	5	5	5	5	5	5	4	3	1	2
2021-07-18 18:20:20	2021-07-18 18:49:39	100	1	1	37	160	59	25	2	2	#NULL!	1	3	1	1	4	4	2	2	8	2		3	#NULL!	0	3	2	1	2	2	2	2	2	2	4	#NULL!	1	3	4	1	3	5	3	5	5	2	1	1	3
2021-07-18 18:33:06	2021-07-18 18:51:38	100	1	1	23	160	71	15	2	2	#NULL!	1	3	1	3	4	1	2	2	8	2		3	#NULL!	0	4	1	2	3	1	4	2	2	2	3	1	1	4	4	1	2	5	3	4	5	2	1	2	2
2021-07-18 18:44:15	2021-07-18 18:59:55	100	1	1	21	161	48	13	2	2	#NULL!	1	1	1	3	4	1	2	2	8	2		3	#NULL!	1	4	1	4	3	3	3	3	3	3	3	2	4	2	5	3	5	5	4	4	5	4	2	2	2
2021-07-18 18:50:15	2021-07-18 19:05:08	100	1	1	25	172	69	15	2	2	#NULL!	1	1	1	1	4	1	2	1	4	1	asthma migraines	1	#NULL!	1	4	1	5	4	4	3	5	4	4	4	1	2	5	5	4	5	5	3	5	5	4	3	2	3
2021-07-18 19:10:25	2021-07-18 19:21:55	100	1	1	30	162	67	17	2	2	1948	1	1	1	3	4	1	2	2	3	2		3	#NULL!	1	4	2	3	5	5	5	5	4	3	5	1	1	5	5	5	5	5	5	5	5	4	1	3	3
2021-07-18 19:20:14	2021-07-18 19:35:11	100	1	1	24	153	49	12	2	2	#NULL!	1	1	1	3	4	1	2	2	8	2		3	#NULL!	1	5	1	2	4	2	4	3	3	3	5	3	3	2	5	5	3	5	1	5	5	4	4	3	2
2021-07-18 19:21:03	2021-07-18 19:41:25	100	1	1	24	158	54	13	2	2	1948	1	1	1	3	4	1	2	2	4	1	Hashimoto	2	6	1	2	2	4	3	2	2	5	2	3	3	2	3	1	2	2	3	5	1	3	2	1	3	2	1
2021-07-18 19:42:42	2021-07-18 19:54:31	100	1	1	34	158	70	16	2	2	#NULL!	1	1	1	3	4	1	2	2	8	2		3	#NULL!	1	3	1	1	2	3	2	3	2	1	2	1	1	5	4	3	1	1	2	1	5	1	1	2	2
2021-07-18 19:39:48	2021-07-18 20:06:59	100	1	1	64	157	70	17	2	1	1980	6	1	1	1	4	1	3	2	9	1	Krohn's disease	4	20	1	5	2	2	3	5	5	2	2	4	3	2	1	3	5	4	2	3	3	3	5	3	2	3	3
2021-07-18 19:54:51	2021-07-18 20:10:46	100	1	1	46	165	65	16	2	2	#NULL!	1	1	1	1	4	1	2	2	8	2		3	0	1	5	1	3	4	4	3	4	3	2	2	2	2	1	4	4	5	5	3	5	5	3	3	3	3
2021-07-18 20:04:21	2021-07-18 20:18:04	100	1	1	22	166	52	12	2	2	#NULL!	1	3	1	3	4	1	2	3	8	2		3	#NULL!	1	4	2	2	3	3	3	3	3	3	3	1	3	5	5	4	3	3	4	4	5	3	3	2	4
2021-07-18 20:11:35	2021-07-18 20:21:48	100	1	1	22	162	59	13	2	2	#NULL!	1	1	1	3	4	2	2	1	9	2		3	20	1	4	2	4	3	3	3	4	3	3	3	2	2	4	5	3	2	3	2	2	5	3	3	1	2
2021-07-18 20:03:39	2021-07-18 20:22:44	100	1	1	22	153	39	13	2	2	#NULL!	1	1	1	3	4	1	2	1	4	2		1	35	0	3	2	5	3	2	3	5	3	3	3	3	3	1	3	5	1	1	1	3	5	1	1	1	2
2021-07-18 20:28:40	2021-07-18 20:43:54	100	1	1	32	164	85	22	2	2	#NULL!	1	2	1	3	4	1	2	2	4	1	asthma	1	20	1	4	2	3	4	4	3	4	3	4	3	3	3	5	5	2	5	4	5	3	5	3	4	4	3
2021-07-18 20:31:37	2021-07-18 20:45:12	100	1	1	22	154	48	12	2	2	1948	2	1	1	3	4	1	2	2	8	2		3	0	1	3	1	2	4	4	1	1	2	2	3	4	4	5	1	1	1	1	3	1	5	3	1	1	1
2021-07-18 20:33:32	2021-07-18 20:46:34	100	1	1	32	155	56	21	2	2	#NULL!	1	2	1	1	4	4	2	2	8	2		4	49	1	5	3	3	4	3	3	3	3	3	3	4	4	5	5	5	3	5	5	5	5	3	3	2	2
2021-07-18 20:34:58	2021-07-18 20:47:59	100	1	1	21	164	65	15	2	2	#NULL!	1	1	1	3	4	4	2	2	7	1	PCOS	1	9	1	4	1	2	3	3	3	3	3	2	2	2	2	2	4	3	5	3	1	3	5	3	2	1	2
2021-07-18 20:36:28	2021-07-18 20:50:08	100	1	1	31	157	49	16	2	2	#NULL!	1	1	1	1	4	1	2	3	8	1	do migraines count?	4	60	1	4	1	3	4	1	5	3	2	1	2	1	2	5	5	4	2	4	5	4	4	3	1	2	2
2021-07-18 20:41:02	2021-07-18 20:52:18	100	1	1	21	168	48	13	2	2	1948	1	1	1	4	4	1	2	2	8	2		3	#NULL!	1	5	1	5	5	5	5	5	5	4	5	1	5	5	1	4	5	1	1	5	1	1	1	1	1
2021-07-18 20:48:38	2021-07-18 20:59:50	100	1	1	22	165	60	12	2	2	#NULL!	1	2	1	4	4	1	2	2	8	2		3	#NULL!	0	3	1	1	2	3	3	4	2	1	2	1	1	1	5	1	1	3	3	5	5	3	1	1	3
2021-07-18 20:51:41	2021-07-18 21:02:59	100	1	1	24	172	51	16	2	2	#NULL!	1	1	1	1	4	1	2	2	8	2		3	#NULL!	1	5	2	2	4	1	2	2	2	1	5	1	1	5	5	5	5	4	4	5	5	4	3	3	1
2021-07-18 21:07:19	2021-07-18 21:20:59	100	1	1	30	170	52	18	2	2	#NULL!	1	3	1	1	4	1	2	2	8	1	hyper thyrodism	1	0	0	4	1	2	3	2	3	3	3	2	3	2	1	4	4	3	3	4	1	4	5	3	2	1	4
2021-07-18 21:12:07	2021-07-18 21:40:26	100	1	1	24	161	53	14	2	2	#NULL!	1	1	1	1	4	1	2	2	9	2		3	#NULL!	1	3	2	1	3	2	2	2	2	2	2	1	1	5	4	4	4	2	2	4	5	2	2	3	2
2021-07-18 21:37:41	2021-07-18 21:47:46	100	1	1	27	162	60	14	2	2	#NULL!	1	3	1	1	4	1	2	2	8	2		3	#NULL!	0	5	1	1	3	2	3	1	4	2	4	1	2	5	5	4	5	5	5	5	5	4	4	4	5
2021-07-18 22:09:02	2021-07-18 22:20:38	100	1	1	25	161	52	16	2	2	#NULL!	1	3	1	3	4	1	2	2	4	1	childhood asthma	2	#NULL!	0	4	1	1	2	2	3	1	3	3	3	1	2	4	5	3	3	2	3	5	5	3	2	1	2
2021-07-18 22:11:55	2021-07-18 22:26:28	100	1	1	22	164	55	14	2	2	#NULL!	6	3	1	3	4	1	3	1	#NULL!	2		3	#NULL!	1	5	2	3	3	4	5	3	3	3	5	2	3	5	5	4	5	5	5	5	5	3	3	3	4
2021-07-18 22:07:51	2021-07-18 22:27:41	100	1	1	25	163	52	14	2	2	2021	1	3	1	4	4	1	3	2	7	1	halicobactor	2	0	0	4	1	1	4	4	4	3	3	4	4	1	4	5	5	4	5	5	5	3	5	3	2	3	2
2021-07-18 22:11:19	2021-07-18 22:41:44	100	1	1	30	164	70	18	2	2	#NULL!	1	4	1	1	4	1	2	2	8	2		3	#NULL!	0	2	1	1	2	2	4	2	3	1	3	1	1	4	3	3	2	2	1	3	4	2	2	3	3
2021-07-18 22:43:55	2021-07-18 22:51:19	100	1	1	22	164	62	14	2	2	#NULL!	1	1	1	3	4	1	2	2	3	2		2	#NULL!	1	4	2	2	4	4	4	4	4	2	4	4	4	4	1	2	4	4	4	5	4	5	4	4	2
2021-07-18 22:37:38	2021-07-18 22:53:19	100	1	1	23	168	83	14	2	2	1948	1	3	1	4	4	1	2	2	7	2		1	#NULL!	0	3	1	1	2	2	3	3	3	1	3	1	1	3	4	5	4	5	3	5	5	4	4	5	3
2021-07-18 23:03:05	2021-07-18 23:11:54	100	1	1	24	157	49	16	2	2	#NULL!	1	1	1	1	4	1	2	3	8	2		3	#NULL!	0	1	3	2	2	3	2	3	3	2	3	1	1	3	5	5	3	1	1	1	5	4	1	3	2
2021-07-18 23:03:59	2021-07-18 23:13:51	100	1	1	19	158	54	13	2	2	#NULL!	1	3	1	4	4	1	2	2	3	2		2	#NULL!	0	5	2	2	4	4	3	3	3	2	2	1	1	5	5	3	5	4	1	3	5	2	2	1	2
2021-07-18 23:20:31	2021-07-18 23:27:51	100	1	1	24	165	65	12	2	2	#NULL!	1	1	1	4	4	1	2	2	7	1	migraines	1	50	0	4	1	1	3	2	2	1	3	1	3	1	1	3	5	3	3	3	5	2	5	3	2	1	1
2021-07-18 23:39:48	2021-07-18 23:58:04	100	1	1	26	158	65	18	2	2	#NULL!	1	1	1	4	4	1	2	2	8	2		3	#NULL!	0	3	1	2	2	2	3	2	2	2	2	1	1	5	4	3	3	2	2	3	5	3	3	4	3
2021-07-18 23:51:29	2021-07-19 00:01:45	100	1	1	22	169	54	13	2	2	1948	4	1	1	3	4	1	2	1	5	2		1	33	1	5	4	5	3	5	5	5	5	5	3	3	5	5	5	2	5	4	1	3	5	5	2	3	2
2021-07-18 23:57:24	2021-07-19 00:09:12	100	1	1	19	166	70	12	2	2	#NULL!	1	1	1	3	4	4	2	2	9	2		3	#NULL!	1	5	1	2	4	5	4	4	4	1	5	2	3	5	5	4	5	5	5	5	5	3	5	4	5
2021-07-19 00:01:55	2021-07-19 00:29:16	100	1	1	23	164	64	12	2	2	#NULL!	1	2	1	4	4	4	2	3	8	2		3	#NULL!	1	4	2	2	4	4	5	3	3	4	3	2	3	5	5	3	4	3	4	3	5	3	3	2	3
2021-07-19 00:18:42	2021-07-19 00:38:17	100	1	1	38	164	67	15	2	2	#NULL!	1	3	1	1	4	4	2	2	8	2		3	#NULL!	1	4	1	4	3	3	3	4	3	2	3	1	3	5	5	3	1	4	2	4	5	2	2	1	3
2021-07-19 00:30:52	2021-07-19 00:44:09	100	1	1	21	156	52	#NULL!	2	2	#NULL!	1	1	1	3	4	4	2	2	9	2		3	#NULL!	1	5	2	2	2	2	4	3	3	4	4	2	2	5	5	5	5	3	5	5	5	3	2	3	3
2021-07-19 00:46:01	2021-07-19 01:01:29	100	1	1	20	157	61	12	2	2	#NULL!	1	1	1	3	4	1	2	1	9	2		3	0	0	4	1	2	2	1	3	4	2	3	2	1	1	4	3	2	4	5	1	4	5	4	3	2	2
2021-07-19 01:07:53	2021-07-19 01:17:19	100	1	1	22	158	61	12	2	2	#NULL!	1	1	1	3	4	4	3	3	9	1		1	50	1	3	1	2	2	3	2	3	2	4	3	1	1	5	4	4	3	2	2	4	5	3	2	1	1
2021-07-19 01:20:30	2021-07-19 01:36:05	100	1	1	22	164	45	12	2	2	#NULL!	1	1	1	3	4	4	2	1	8	2		#NULL!	#NULL!	1	5	2	5	4	4	4	5	4	3	4	3	3	5	5	5	5	4	5	5	5	3	5	3	3
2021-07-19 01:31:20	2021-07-19 01:42:37	100	1	1	23	160	57	15	2	2	#NULL!	1	1	1	1	4	1	2	2	8	2		3	#NULL!	0	4	3	4	5	5	5	5	5	4	4	1	3	5	5	4	5	5	5	5	5	1	1	1	3
2021-07-19 01:33:42	2021-07-19 01:44:38	100	1	1	37	163	71	15	2	2	#NULL!	1	3	1	1	4	1	2	2	8	2		3	#NULL!	1	5	1	1	3	3	2	2	2	1	4	1	2	5	3	3	2	5	3	4	5	4	3	1	3
2021-07-19 01:42:25	2021-07-19 01:55:06	100	1	1	37	160	112	15	2	2	#NULL!	1	3	1	3	4	4	2	2	8	2		4	#NULL!	1	3	1	2	3	3	3	2	3	2	3	1	1	1	5	4	5	3	3	3	5	4	3	2	2
2021-07-19 01:50:00	2021-07-19 02:05:03	100	1	1	45	153	84	19	2	2	#NULL!	1	1	1	1	4	2	2	2	8	1	migraines	4	100	0	3	1	1	1	2	1	1	1	3	2	1	1	1	4	5	3	3	1	4	4	1	1	2	2
2021-07-19 02:07:56	2021-07-19 02:21:31	100	1	1	21	163	51	12	2	2	#NULL!	1	1	1	3	4	4	2	2	2	1	Gilles de la Tourette's Disorder	1	10	1	5	2	2	3	4	4	1	2	1	5	4	4	5	5	5	5	3	1	5	5	4	2	1	2
2021-07-19 02:10:41	2021-07-19 02:22:06	100	1	1	28	163	66	18	2	2	#NULL!	1	1	1	3	4	1	2	2	8	2		3	#NULL!	0	3	1	2	4	4	3	5	2	1	3	2	1	5	4	4	5	3	2	5	5	4	3	2	2
2021-07-19 02:10:25	2021-07-19 02:27:07	100	1	1	24	165	65	16	2	2	#NULL!	6	1	1	3	4	1	2	2	1	2		1	96	0	5	3	1	1	1	5	3	3	1	3	1	1	3	4	2	2	4	4	4	5	2	2	1	1
2021-07-19 02:47:59	2021-07-19 02:58:47	100	1	1	20	167	68	12	2	2	1948	1	5	1	3	4	1	2	2	8	2		3	#NULL!	0	4	2	4	3	3	5	5	4	5	4	3	4	5	4	3	5	5	5	3	5	4	5	4	3
2021-07-19 02:58:18	2021-07-19 03:10:50	100	1	1	22	158	60	12	2	2	#NULL!	1	1	1	3	4	4	1	2	7	1	in my adolescence from the age of 14 until I was 17 I had hyper-thyrodism	2	#NULL!	1	5	2	1	3	1	5	3	4	2	4	3	3	5	5	5	3	5	5	5	5	3	5	1	4
2021-07-19 03:29:06	2021-07-19 03:47:43	100	1	1	22	155	47	13	2	2	#NULL!	1	3	1	4	4	4	2	1	9	2		4	50	1	4	1	5	3	3	3	5	3	2	4	2	4	4	5	4	4	5	5	5	5	4	5	4	3
2021-07-19 03:12:14	2021-07-19 03:49:29	100	1	1	28	167	56	17	2	2	#NULL!	1	1	1	4	4	1	2	2	5	1	OCD	1	10	1	4	1	2	3	2	2	2	4	2	4	2	4	2	3	1	2	5	5	3	5	2	3	2	1
2021-07-19 03:36:25	2021-07-19 03:51:43	100	1	1	27	161	95	17	2	2	#NULL!	1	1	1	1	4	4	2	3	8	2		3	#NULL!	1	4	1	3	3	4	4	3	3	3	3	2	2	5	4	3	5	5	5	5	5	3	5	3	5
2021-07-19 04:09:18	2021-07-19 04:21:25	100	1	1	31	100	60	18	2	2	#NULL!	1	2	1	4	4	1	2	2	8	2		3	#NULL!	0	2	1	1	2	3	3	2	3	2	3	2	1	3	5	4	3	3	2	2	4	3	1	2	3
2021-07-19 05:03:53	2021-07-19 05:21:32	100	1	1	24	168	35	12	2	2	#NULL!	1	3	1	3	4	2	2	1	9	1	anemia; Diaphragmatic hernia	1	65	1	4	1	1	4	4	4	2	4	4	4	2	3	4	5	3	1	4	5	5	5	5	2	2	2
2021-07-19 06:00:44	2021-07-19 06:13:50	100	1	1	25	158	87	17	2	2	1948	1	1	1	1	4	4	2	1	8	2		3	#NULL!	1	5	2	3	4	4	3	5	3	4	4	2	2	4	5	3	5	5	3	5	5	5	4	3	3
2021-07-19 06:49:58	2021-07-19 07:06:10	100	1	1	37	159	45	12	2	2	#NULL!	1	1	1	1	4	4	2	1	8	2		3	#NULL!	1	5	1	3	1	1	3	5	1	3	4	5	5	5	5	5	5	5	5	5	5	1	3	4	5
2021-07-19 07:48:41	2021-07-19 07:59:41	100	1	1	23	169	63	12	2	2	#NULL!	1	3	1	4	4	1	2	2	8	2		3	#NULL!	0	4	1	1	3	2	4	4	3	3	3	1	1	4	3	2	4	5	1	5	5	2	1	2	3
2021-07-19 07:54:33	2021-07-19 08:12:57	100	1	1	26	160	75	18	2	2	#NULL!	1	3	1	4	4	4	2	2	4	1	asthma	1	20	1	3	1	3	3	1	3	2	4	2	4	1	2	5	5	5	4	3	4	5	5	3	4	3	2
2021-07-19 08:53:30	2021-07-19 09:06:22	100	1	1	36	160	62	17	2	2	#NULL!	1	1	1	1	4	1	2	2	8	2		3	#NULL!	0	2	2	1	2	2	3	4	4	2	4	1	2	1	2	3	4	4	3	5	5	4	3	3	1
2021-07-19 09:55:36	2021-07-19 10:07:00	100	1	1	25	156	55	15	2	2	#NULL!	1	1	1	1	4	1	2	2	8	2		3	#NULL!	0	3	1	2	2	2	4	2	2	2	2	2	2	3	4	3	1	2	1	5	5	2	1	2	3
2021-07-19 10:12:03	2021-07-19 10:32:37	100	1	1	28	156	42	17	2	1	2010	6	1	1	1	4	1	2	2	7	2		1	15	0	3	1	4	2	4	3	4	2	1	2	1	1	5	4	2	2	3	2	3	5	2	1	1	2
2021-07-19 10:39:22	2021-07-19 10:49:56	100	1	1	24	154	55	13	2	2	#NULL!	1	3	1	3	4	1	2	2	8	2		3	#NULL!	1	4	1	5	3	1	3	5	3	4	5	1	1	5	5	3	5	5	1	5	5	1	3	1	3
2021-07-19 10:02:02	2021-07-19 11:27:34	100	1	1	31	164	76	17	2	2	#NULL!	1	2	1	4	4	1	2	1	5	2		1	11	1	4	3	4	4	4	3	2	3	4	4	3	3	5	5	5	2	4	3	5	4	4	4	3	2
2021-07-19 11:13:22	2021-07-19 11:29:27	100	1	1	26	162	50	15	2	2	#NULL!	1	3	1	4	4	1	2	2	2	1	IBS and halicobactor	2	#NULL!	1	2	1	3	2	2	4	3	3	3	2	1	1	4	4	3	1	2	3	1	5	2	1	1	2
2021-07-19 11:23:24	2021-07-19 11:33:28	100	1	1	20	161	58	12	2	2	#NULL!	1	1	1	3	4	1	2	3	8	2		3	0	1	4	1	1	4	1	2	1	3	1	5	2	4	5	4	3	5	4	1	5	5	2	5	3	2
2021-07-19 12:34:27	2021-07-19 12:43:44	100	1	1	19	161	57	12	2	2	#NULL!	1	3	1	3	4	1	2	2	8	2		3	0	1	5	2	4	4	5	5	5	4	2	5	1	5	5	5	1	5	4	5	5	5	3	2	3	4
2021-07-19 12:37:16	2021-07-19 12:48:55	100	1	1	24	169	73	13	2	2	#NULL!	1	3	1	4	4	1	2	2	1	2		3	#NULL!	1	5	1	4	4	4	4	3	3	3	3	2	2	4	5	5	1	1	3	1	5	2	2	2	4
2021-07-19 12:42:56	2021-07-19 13:04:30	100	1	1	27	160	45	16	2	2	#NULL!	1	2	1	1	4	4	2	2	1	2		4	42	1	5	1	5	3	5	3	5	2	3	5	1	1	5	5	3	5	4	5	5	5	5	1	4	4
2021-07-13 17:11:04	2021-07-13 17:20:17	98	0	1	24	165	62	#NULL!	2	2	#NULL!	1	3	1	4	4	1	2	2	2	1	Krohn's disease	1	30	0	4	1	1	2	3	3	1	2	2	4	1	1	5	2	3	5	5	1	4	5	3	1	3	1
2021-07-18 22:23:44	2021-07-18 22:40:03	98	0	1	23	170	82	14	2	2	#NULL!	1	1	1	3	4	1	2	2	4	1	hypo-thyrodism	1	10	1	5	1	2	2	2	4	2	3	5	2	1	3	5	5	1	4	2	1	4	5	4	1	2	4
2021-07-11 17:10:42	2021-07-11 17:19:07	100	1	1	30	178	68	16	1	2	1948	1	2	1	1	5	5	2	2	8	2		3	#NULL!	1	2	2	1	1	4	4	2	2	3	3	1	2	3	4	4	3	5	3	5	5	2	1	2	1
2021-07-11 17:13:58	2021-07-11 17:24:21	100	1	1	31	179	103	16	1	2	1948	1	2	1	4	5	2	2	2	1	2		2	#NULL!	0	3	2	1	3	2	2	3	3	1	2	1	2	1	2	4	1	2	1	1	2	1	1	2	1
2021-07-11 18:17:50	2021-07-11 18:29:42	100	1	1	29	165	58	16	1	2	#NULL!	1	3	1	3	5	4	2	1	7	2		2	1	1	5	2	3	4	5	5	5	5	5	5	5	5	5	5	5	5	5	5	5	5	3	4	4	5
2021-07-11 18:27:41	2021-07-11 18:37:08	100	1	1	29	166	66	14	1	2	#NULL!	1	2	1	4	5	4	2	2	8	2		4	20	1	5	2	2	2	3	3	1	2	1	3	3	3	5	5	4	4	4	3	5	5	5	5	5	2
2021-07-11 18:30:55	2021-07-11 18:44:49	100	1	1	61	161	70	14	1	2	#NULL!	1	5	1	1	5	5	2	2	8	2		2	#NULL!	0	5	2	4	5	5	5	5	2	5	5	5	5	1	1	1	1	1	1	1	1	3	1	5	3
2021-07-11 18:24:30	2021-07-11 18:46:01	100	1	1	28	169	88	15	1	2	#NULL!	2	2	5	3	5	5	3	3	1	1	ADHD	1	#NULL!	0	1	1	1	2	2	2	1	2	2	2	1	1	3	3	2	2	1	1	1	5	1	1	1	1
2021-07-11 18:33:31	2021-07-11 18:46:50	100	1	1	37	188	115	16	1	2	#NULL!	1	3	1	1	5	#NULL!	2	2	8	2		3	0	0	2	1	2	2	2	2	3	2	2	2	2	2	5	3	3	3	3	3	5	4	4	1	3	1
2021-07-11 18:37:17	2021-07-11 18:54:02	100	1	1	38	190	103	16	1	2	#NULL!	1	2	1	1	5	5	2	2	2	1	Internal muscle imbalance	2	#NULL!	0	4	1	1	3	1	2	1	3	1	2	1	1	3	5	4	1	3	1	3	2	1	1	1	1
2021-07-11 18:58:08	2021-07-11 19:07:27	100	1	1	40	175	70	15	1	2	#NULL!	1	2	5	1	5	5	2	2	8	2		3	#NULL!	0	5	1	1	1	3	2	1	2	1	3	1	1	4	2	2	1	1	2	1	2	1	1	1	1
2021-07-11 19:07:34	2021-07-11 19:18:56	100	1	1	32	171	60	17	1	2	#NULL!	1	2	1	1	5	#NULL!	2	2	9	2		3	0	0	4	3	2	3	4	3	4	3	3	2	1	2	3	2	3	2	2	1	2	4	4	2	1	2
2021-07-11 18:58:56	2021-07-11 19:21:31	100	1	1	46	181	96	18	1	2	#NULL!	1	2	1	1	5	5	2	2	8	2		3	#NULL!	0	5	1	1	1	4	2	4	2	1	3	1	1	5	5	4	1	2	1	5	2	5	1	5	4
2021-07-11 19:07:18	2021-07-11 19:22:29	100	1	1	25	179	76	13	1	2	#NULL!	1	2	1	4	5	5	2	1	8	2		3	#NULL!	1	4	1	3	3	4	3	4	3	5	3	1	3	5	4	3	3	2	5	5	5	1	3	4	3
2021-07-11 19:25:31	2021-07-11 19:34:13	100	1	1	33	179	80	12	1	2	#NULL!	1	2	1	1	5	#NULL!	2	2	1	2		1	72	0	3	1	1	1	1	2	1	1	2	2	1	1	1	1	1	1	1	1	5	5	1	1	1	1
2021-07-11 19:25:06	2021-07-11 19:39:35	100	1	1	36	176	79	17	1	2	#NULL!	1	2	1	1	5	5	2	2	8	2		4	39	0	4	#NULL!	1	3	5	4	#NULL!	3	#NULL!	3	#NULL!	3	5	4	3	1	3	5	3	3	3	3	3	3
2021-07-11 19:33:55	2021-07-11 19:42:26	100	1	1	28	183	109	16	1	2	#NULL!	1	2	1	3	5	5	1	2	7	2		2	#NULL!	1	4	2	3	3	3	4	4	4	3	4	2	1	3	5	1	5	2	2	4	5	2	1	1	4
2021-07-11 18:21:04	2021-07-11 19:44:28	100	1	1	29	191	86	16	1	2	#NULL!	1	2	1	3	5	5	2	2	8	2		3	#NULL!	1	2	1	1	2	2	2	2	2	1	3	1	1	3	2	2	4	3	2	3	4	1	3	2	2
2021-07-11 19:28:17	2021-07-11 19:45:57	100	1	1	31	173	75	20	1	2	#NULL!	1	2	1	3	5	5	2	2	4	2		2	#NULL!	0	3	1	2	4	2	4	4	2	2	3	1	2	1	2	1	3	4	1	3	4	2	3	3	2
2021-07-11 19:41:34	2021-07-11 19:55:11	100	1	1	33	180	85	18	1	2	1948	1	2	1	4	5	4	2	2	1	2		2	#NULL!	0	3	2	2	2	2	3	2	2	2	2	1	1	5	4	1	3	4	4	4	5	4	3	1	4
2021-07-11 19:49:26	2021-07-11 20:03:27	100	1	1	30	175	73	18	1	2	#NULL!	1	2	1	4	5	5	2	2	1	#NULL!		2	#NULL!	0	2	1	1	2	3	3	3	1	3	2	1	1	2	3	2	1	2	2	3	3	1	1	3	1
2021-07-11 20:19:32	2021-07-11 21:17:41	100	1	1	26	177	64	13	1	2	#NULL!	1	2	1	4	5	5	2	1	8	2		3	#NULL!	1	3	1	1	2	2	2	1	1	2	3	1	1	2	5	1	1	1	2	2	4	1	3	1	1
2021-07-11 21:23:38	2021-07-11 21:35:34	100	1	1	42	192	89	17	1	2	#NULL!	1	2	1	1	5	5	2	2	8	2		3	#NULL!	0	4	1	1	2	2	3	1	2	1	2	1	1	1	2	1	1	1	1	1	1	3	1	2	1
2021-07-11 22:01:16	2021-07-11 22:44:44	100	1	1	41	171	68	17	1	2	#NULL!	1	2	1	1	5	5	2	2	8	2		3	0	0	4	1	1	1	1	2	1	1	1	2	1	1	4	3	2	2	4	1	3	1	1	1	1	1
2021-07-11 22:49:32	2021-07-11 23:13:52	100	1	1	22	187	75	12	1	2	#NULL!	1	2	1	3	5	#NULL!	2	2	3	2		2	#NULL!	0	4	1	3	1	2	4	4	2	4	3	3	2	3	5	1	1	2	2	3	5	2	1	1	2
2021-07-11 23:08:21	2021-07-11 23:20:54	100	1	1	30	179	76	16	1	2	#NULL!	1	2	1	1	5	5	2	2	9	2		3	#NULL!	0	2	1	3	2	1	2	5	2	5	3	1	1	4	5	5	1	4	1	3	5	3	1	3	1
2021-07-11 23:12:33	2021-07-11 23:26:17	100	1	1	40	178	73	13	1	2	#NULL!	1	2	1	1	5	#NULL!	2	2	8	2		3	#NULL!	1	5	1	1	1	4	2	3	2	1	2	1	1	4	4	3	3	3	5	4	5	3	1	2	1
2021-07-12 01:28:58	2021-07-12 01:46:52	100	1	1	29	173	196	15	1	2	#NULL!	1	5	1	3	5	5	2	2	8	2		3	#NULL!	0	2	1	2	3	1	2	1	2	1	3	1	2	2	2	1	2	3	1	2	4	2	1	3	1
2021-07-12 01:51:05	2021-07-12 02:04:44	100	1	1	27	181	85	16	1	2	#NULL!	1	2	1	4	5	5	1	2	1	2		1	20	0	3	1	1	2	3	3	2	2	1	3	1	1	1	4	1	2	5	4	4	5	1	1	1	3
2021-07-12 02:11:40	2021-07-12 02:42:25	100	1	1	70	175	83	#NULL!	1	2	#NULL!	1	2	1	1	5	5	2	2	8	2		4	20	0	4	1	2	1	1	1	2	2	2	2	1	1	1	4	3	1	2	3	4	5	3	1	3	1
2021-07-12 10:49:01	2021-07-12 11:03:58	100	1	1	24	170	66	14	1	2	#NULL!	1	2	1	4	5	#NULL!	2	2	8	2		4	10	1	3	1	2	3	3	3	3	3	2	2	1	1	3	5	1	4	3	1	3	5	2	1	1	2
2021-07-12 12:09:17	2021-07-12 12:31:48	100	1	1	28	188	83	16	1	2	#NULL!	1	2	1	4	5	5	2	2	9	2		3	#NULL!	0	3	1	2	3	2	2	2	2	3	2	1	1	2	3	2	4	2	1	1	3	1	1	2	2
2021-07-12 12:45:11	2021-07-12 13:22:10	100	1	1	31	180	74	14	1	2	#NULL!	1	2	1	1	5	4	2	2	1	1	ADHD	1	60	1	3	1	5	3	2	2	5	2	5	2	3	3	5	3	1	1	2	5	5	2	5	5	1	3
2021-07-12 14:01:48	2021-07-12 14:15:01	100	1	1	25	173	55	15	1	2	#NULL!	1	2	1	3	5	5	2	2	8	1	a blood clotting disorder	1	5	1	3	1	2	3	3	3	2	3	3	2	1	1	3	4	3	2	4	1	3	5	2	4	4	2
2021-07-12 14:47:13	2021-07-12 15:07:06	100	1	1	27	168	62	16	1	2	#NULL!	1	2	1	4	5	#NULL!	2	1	4	1	asthma	2	#NULL!	0	5	1	1	2	2	4	2	2	2	3	1	1	4	4	2	2	1	2	2	4	3	3	1	1
2021-07-12 14:34:26	2021-07-12 15:07:27	100	1	1	36	170	91	17	1	2	#NULL!	1	2	1	1	5	#NULL!	2	2	4	1	asthma	2	#NULL!	0	3	1	2	2	3	2	3	2	4	3	1	2	4	5	4	4	4	3	4	5	1	2	4	4
2021-07-12 14:48:57	2021-07-12 15:17:59	100	1	1	32	167	65	13	1	2	#NULL!	1	2	1	3	5	4	1	2	1	1	A bad fall when I was 17, suffering a head injury - I was in a coma for a month	#NULL!	50	1	4	1	2	2	3	2	4	2	3	2	2	2	4	4	4	2	4	2	4	5	2	1	1	2
2021-07-12 15:38:08	2021-07-12 16:00:22	100	1	1	21	167	68	12	1	2	#NULL!	1	2	1	3	5	5	2	2	8	2		3	#NULL!	0	4	1	2	2	3	3	2	4	3	4	1	4	4	4	2	4	2	3	5	5	3	1	2	3
2021-07-12 15:47:44	2021-07-12 16:02:02	100	1	1	29	177	75	16	1	2	#NULL!	1	2	1	4	5	5	2	3	8	2		3	#NULL!	1	4	1	2	3	4	2	2	2	2	3	2	2	3	5	2	3	5	2	5	5	3	3	2	1
2021-07-12 14:23:54	2021-07-12 18:23:52	100	1	1	43	164	65	18	1	2	#NULL!	1	2	1	1	5	#NULL!	2	2	8	2		3	#NULL!	0	5	1	1	1	1	4	1	1	1	4	1	1	5	1	1	1	1	1	1	1	1	1	1	1
2021-07-12 22:36:48	2021-07-12 22:51:20	100	1	1	37	185	72	16	1	2	#NULL!	1	2	5	1	5	5	2	2	8	2		3	#NULL!	1	5	4	3	3	4	5	4	3	2	3	1	1	5	4	3	3	5	4	5	3	4	3	3	1
2021-07-13 01:44:58	2021-07-13 02:08:37	100	1	1	35	174	52	15	1	2	#NULL!	1	2	5	1	5	4	3	2	7	2		3	#NULL!	1	4	1	3	3	3	4	4	3	3	4	2	2	4	2	3	4	2	3	2	1	3	2	1	1
2021-07-13 04:05:47	2021-07-13 04:17:21	100	1	1	33	166	72	12	1	2	#NULL!	1	2	5	3	5	4	2	2	4	1	diabetes	1	0	1	5	1	3	3	3	3	4	4	2	3	1	3	5	5	5	4	4	5	5	5	3	2	3	3
2021-07-13 04:29:47	2021-07-13 04:37:50	100	1	1	23	167	55	13	1	2	#NULL!	1	2	1	3	5	#NULL!	1	2	8	2		3	#NULL!	0	4	2	2	3	2	3	3	3	2	3	3	3	2	5	3	3	4	4	2	5	4	3	4	3
2021-07-12 22:11:11	2021-07-13 13:43:11	100	1	1	34	187	82	17	1	2	#NULL!	1	2	1	1	5	5	2	2	9	2		3	#NULL!	0	2	1	1	2	1	3	1	2	2	2	1	1	1	2	1	1	1	1	1	1	1	1	1	1
2021-07-13 19:24:31	2021-07-13 20:04:44	100	1	1	39	180	82	17	1	2	#NULL!	1	2	1	3	5	#NULL!	2	3	8	2		3	#NULL!	1	4	1	1	2	3	2	2	2	1	3	1	2	3	2	3	1	5	1	2	2	2	3	2	1
2021-07-14 09:06:19	2021-07-14 09:28:56	100	1	1	33	170	74	17	1	2	#NULL!	1	2	1	1	5	#NULL!	2	2	1	2		1	20	0	2	1	2	3	2	3	4	3	1	3	1	3	1	2	3	2	3	1	4	3	2	1	3	1
2021-07-15 10:59:12	2021-07-15 11:22:22	100	1	1	24	183	95	12	1	2	#NULL!	1	2	1	4	5	4	2	2	8	2		3	#NULL!	1	4	1	1	1	1	2	1	1	1	2	1	1	1	1	1	3	1	1	2	3	2	1	1	1
2021-07-15 23:24:48	2021-07-15 23:45:48	100	1	1	23	175	75	16	1	2	#NULL!	1	2	1	4	5	5	2	2	8	1	Panic disorder	4	10	1	4	1	1	1	1	3	2	3	3	3	1	1	3	2	1	1	3	1	2	3	1	2	1	1
2021-07-17 02:09:25	2021-07-17 02:22:40	100	1	1	25	174	108	12	1	2	#NULL!	1	2	1	3	5	5	1	3	4	2		2	0	1	4	1	1	2	2	2	3	2	2	3	1	1	4	5	3	3	3	1	4	3	2	3	1	2
2021-07-18 16:38:43	2021-07-18 16:52:58	100	1	1	31	172	70	16	1	#NULL!	#NULL!	1	2	5	3	5	5	2	2	9	2		2	#NULL!	1	3	1	1	1	2	2	2	1	3	2	1	2	1	3	3	1	1	1	2	1	1	1	1	1
2021-07-18 16:49:54	2021-07-18 17:04:47	100	1	1	25	173	72	13	1	2	#NULL!	1	2	1	3	5	4	2	1	8	2		3	#NULL!	1	2	1	1	3	2	3	2	3	2	4	2	2	1	3	2	3	5	1	5	4	1	1	3	1
2021-07-18 17:04:37	2021-07-18 17:17:08	100	1	1	29	169	60	17	1	2	#NULL!	1	2	1	3	5	#NULL!	2	2	8	1	Krohn's disease	4	35	1	4	1	2	3	3	3	3	3	2	4	2	1	2	4	2	1	2	2	3	2	2	3	3	3
2021-07-18 16:59:58	2021-07-18 17:25:27	100	1	1	30	180	84	19	1	2	#NULL!	1	2	1	4	5	5	2	2	7	1	many allergies	1	50	1	5	2	1	5	1	4	1	5	1	5	1	1	1	3	5	1	4	1	5	1	4	3	3	4
2021-07-18 19:09:38	2021-07-18 19:22:47	100	1	1	38	170	65	15	1	2	#NULL!	1	5	1	3	5	#NULL!	2	2	8	2		3	0	1	5	1	1	3	2	3	3	2	1	3	1	2	2	4	1	3	5	1	5	5	3	3	3	2
2021-07-18 19:46:36	2021-07-18 19:57:24	100	1	1	26	180	76	15	1	2	#NULL!	1	2	1	4	5	#NULL!	2	2	4	1	bronchitis	2	#NULL!	0	4	2	2	3	4	4	2	3	2	4	1	2	1	3	2	5	5	2	5	5	4	3	2	2
2021-07-18 21:22:24	2021-07-18 21:55:32	100	1	1	38	0	0	15	1	2	#NULL!	1	2	1	1	5	4	2	1	1	2		3	#NULL!	1	4	1	1	3	2	3	3	3	1	4	1	1	5	3	3	2	3	3	5	5	2	1	1	4
2021-07-18 23:07:21	2021-07-18 23:16:43	100	1	1	27	182	77	15	1	2	#NULL!	1	2	1	1	5	5	3	2	1	1	sensory regulation	2	#NULL!	0	4	1	1	3	1	2	1	1	3	4	1	2	3	4	4	1	3	1	2	4	3	1	2	1
2021-07-18 23:37:47	2021-07-18 23:51:35	100	1	1	33	173	88	20	1	2	#NULL!	1	5	5	4	5	5	2	2	9	2		3	#NULL!	1	5	1	1	1	1	4	1	4	1	4	1	5	5	5	3	1	2	5	2	5	4	2	4	1
2021-07-19 02:14:10	2021-07-19 02:21:22	100	1	1	27	180	65	15	1	2	#NULL!	1	2	1	3	5	5	2	2	8	2		3	#NULL!	0	4	1	4	2	5	4	5	2	2	4	3	4	3	5	2	4	2	1	4	5	2	1	1	2
2021-07-19 02:10:49	2021-07-19 02:44:25	100	1	1	22	173	61	13	1	2	#NULL!	1	2	1	3	5	#NULL!	2	2	5	#NULL!		1	0	0	5	2	2	4	4	2	5	3	5	2	2	3	5	5	4	5	2	1	4	5	3	4	2	3
2021-07-19 02:34:12	2021-07-19 02:46:39	100	1	1	48	189	118	22	1	2	#NULL!	1	2	1	1	5	4	2	2	7	2		2	#NULL!	1	4	1	3	3	3	3	3	3	3	2	2	2	4	5	2	2	2	2	3	5	3	2	1	2
2021-07-19 05:02:13	2021-07-19 05:15:26	100	1	1	21	180	124	16	1	2	#NULL!	1	2	5	3	5	4	3	1	1	#NULL!		1	49	1	5	1	1	4	3	3	1	3	2	5	2	1	3	4	4	3	5	5	5	5	4	5	3	4
2021-07-19 07:25:53	2021-07-19 07:40:01	100	1	1	61	173	104	24	1	2	#NULL!	1	2	1	1	5	#NULL!	2	2	8	2		4	#NULL!	0	3	1	2	2	2	3	2	2	1	2	1	2	2	4	2	4	4	1	4	4	2	2	3	1
2021-07-19 07:41:12	2021-07-19 08:01:54	100	1	1	30	173	86	18	1	2	#NULL!	1	3	1	4	5	5	2	2	9	2		4	18	0	3	1	3	3	4	1	3	2	4	1	1	2	#NULL!	3	3	1	4	1	4	4	2	2	2	2
2021-07-18 19:55:29	2021-07-19 08:54:07	100	1	1	27	180	61	16	1	2	#NULL!	1	2	1	4	5	5	2	2	#NULL!	2		4	0	1	5	1	1	4	2	2	1	4	1	5	2	5	1	1	1	1	5	5	5	5	2	4	1	1
2021-07-19 11:14:37	2021-07-19 11:26:10	100	1	1	24	171	60	12	1	2	#NULL!	1	2	1	3	5	5	3	2	5	2		3	#NULL!	1	3	1	5	2	3	4	5	3	2	3	2	3	3	5	5	3	5	3	5	3	4	2	2	2
2021-07-19 12:05:51	2021-07-19 12:11:14	100	1	1	31	176	82	15	1	2	#NULL!	1	3	1	1	5	5	2	2	5	2		2	#NULL!	1	4	3	3	3	4	4	4	3	4	3	2	2	4	4	2	2	4	4	5	5	3	1	2	3
2021-07-11 17:21:42	2021-07-11 17:34:53	100	1	1	26	158	60	15	2	2	1948	1	2	1	4	5	#NULL!	2	1	2	2		1	60	0	4	3	5	3	4	4	5	2	4	2	1	1	5	4	4	4	3	4	5	5	2	1	2	5
2021-07-11 17:21:57	2021-07-11 17:38:37	100	1	1	29	161	57	16	2	2	#NULL!	1	2	1	4	5	5	2	2	8	2		3	#NULL!	0	3	1	4	3	2	5	5	3	5	3	4	4	4	5	2	1	5	1	5	5	2	3	2	1
2021-07-11 17:26:10	2021-07-11 17:39:10	100	1	1	26	156	57	16	2	2	#NULL!	4	2	1	4	5	#NULL!	2	1	8	2		3	#NULL!	1	1	1	1	3	4	4	2	3	3	3	1	1	5	4	1	3	2	1	4	5	1	1	1	1
2021-07-11 17:28:18	2021-07-11 17:43:09	100	1	1	30	150	80	16	2	2	#NULL!	1	2	1	3	5	#NULL!	2	2	8	2		3	#NULL!	1	4	1	2	3	3	3	1	3	1	3	1	1	5	5	4	2	5	5	5	5	4	3	2	4
2021-07-11 17:36:55	2021-07-11 17:50:35	100	1	1	30	161	53	16	2	2	#NULL!	1	2	1	1	5	3	2	2	8	2		3	#NULL!	1	3	2	4	3	4	2	2	3	2	3	1	3	3	4	4	2	2	2	2	4	2	1	1	1
2021-07-11 18:05:42	2021-07-11 18:15:28	100	1	1	25	155	40	12	2	2	#NULL!	1	2	1	3	5	#NULL!	2	2	8	2		3	#NULL!	0	5	2	1	3	3	3	2	2	3	3	1	1	5	5	5	5	3	4	5	5	4	1	1	4
2021-07-11 17:46:14	2021-07-11 18:16:35	100	1	1	26	148	45	15	2	2	#NULL!	1	2	1	3	5	#NULL!	2	2	8	2		3	0	0	3	1	2	3	2	3	1	2	1	3	1	2	5	4	3	3	5	5	2	5	3	3	2	2
2021-07-11 17:28:39	2021-07-11 18:22:42	100	1	1	28	156	67	16	2	2	#NULL!	1	2	1	1	5	#NULL!	2	2	4	1	asthma	2	#NULL!	1	5	1	1	2	3	3	2	2	2	4	2	1	5	5	4	5	5	5	5	5	5	3	2	3
2021-07-11 18:15:42	2021-07-11 18:35:31	100	1	1	58	158	50	14	2	2	#NULL!	1	2	1	1	5	5	2	2	8	2		3	0	0	5	3	2	3	3	3	2	3	3	4	3	2	2	5	3	3	1	2	3	5	4	3	2	3
2021-07-11 18:29:39	2021-07-11 18:40:41	100	1	1	28	166	58	16	2	1	1997	4	2	1	6	5	4	2	2	8	2		3	#NULL!	1	3	1	1	2	3	3	2	3	2	3	1	1	1	5	1	2	5	5	5	5	3	2	1	2
2021-07-11 18:37:21	2021-07-11 18:48:36	100	1	1	26	158	45	15	2	2	#NULL!	1	2	1	4	5	5	2	2	8	2		3	#NULL!	0	3	2	1	3	3	3	3	3	4	3	4	2	4	4	2	4	4	5	5	5	3	2	2	2
2021-07-11 18:46:06	2021-07-11 18:58:22	100	1	1	49	164	75	14	2	2	#NULL!	1	2	1	1	5	5	2	2	8	2		3	#NULL!	0	3	1	2	2	3	3	3	2	1	3	2	2	1	5	5	1	2	1	3	5	3	2	2	5
2021-07-11 18:37:18	2021-07-11 19:02:36	100	1	1	31	155	50	16	2	2	#NULL!	1	2	1	1	5	5	2	2	8	2		3	0	0	4	1	3	3	2	3	2	3	3	3	1	1	2	4	4	3	2	2	3	3	2	1	2	2
2021-07-11 18:54:30	2021-07-11 19:11:13	100	1	1	29	163	50	17	2	2	#NULL!	1	2	1	1	5	5	2	2	8	2		3	#NULL!	0	5	2	3	5	4	4	4	3	3	3	3	4	5	4	3	5	4	3	4	5	2	2	3	4
2021-07-11 18:32:33	2021-07-11 19:17:47	100	1	1	27	165	53	17	2	2	#NULL!	1	2	1	4	5	4	2	2	9	2		4	10	0	5	2	2	1	2	2	3	3	2	3	1	1	3	5	4	4	2	1	4	5	2	1	3	2
2021-07-11 18:59:20	2021-07-11 19:20:25	100	1	1	35	160	48	12	2	1	1994	6	2	1	3	5	4	2	2	8	1	migraines	1	40	0	3	1	2	2	2	3	2	2	2	2	1	2	2	4	3	2	3	1	4	2	4	1	3	2
2021-07-11 19:11:34	2021-07-11 19:23:31	100	1	1	30	166	61	18	2	2	#NULL!	1	2	1	1	5	5	2	2	8	2		3	0	0	3	1	1	3	1	3	5	3	1	3	4	3	5	5	5	1	3	1	3	5	1	4	1	1
2021-07-11 19:39:33	2021-07-11 19:50:34	100	1	1	25	178	60	14	2	2	#NULL!	1	2	1	4	5	#NULL!	2	2	8	2		3	#NULL!	0	2	1	3	2	2	3	3	2	3	2	1	2	4	4	2	1	2	1	2	2	2	1	1	2
2021-07-11 20:01:07	2021-07-11 20:12:18	100	1	1	24	156	55	17	2	2	#NULL!	3	3	2	3	5	#NULL!	2	2	7	1	asthma of the skin	1	36	0	3	1	3	3	3	3	4	4	3	3	2	2	4	4	4	4	2	5	5	5	1	1	2	1
2021-07-11 19:54:43	2021-07-11 20:15:05	100	1	1	27	155	48	16	2	2	#NULL!	1	2	1	3	5	5	2	2	8	2		3	#NULL!	0	3	1	1	3	1	3	1	3	1	3	1	1	4	4	3	5	2	2	5	5	2	1	1	1
2021-07-11 20:11:42	2021-07-11 20:35:08	100	1	1	25	155	55	15	2	2	#NULL!	1	2	1	3	5	5	2	2	8	2		3	#NULL!	0	4	1	1	2	3	4	4	2	2	3	2	1	1	5	3	5	4	1	5	5	3	3	1	4
2021-07-11 20:12:09	2021-07-11 20:59:48	100	1	1	26	169	62	15	2	2	#NULL!	1	2	1	4	5	5	2	2	8	2		3	#NULL!	0	3	2	3	3	3	2	4	2	4	2	1	1	2	4	4	1	2	2	2	5	3	3	1	2
2021-07-11 20:57:50	2021-07-11 21:07:49	100	1	1	26	175	66	15	2	2	#NULL!	1	2	1	4	5	5	2	2	5	2		2	#NULL!	0	4	2	4	3	3	3	4	3	2	3	2	2	4	4	3	5	3	2	4	5	2	2	2	2
2021-07-11 21:09:59	2021-07-11 21:23:44	100	1	1	33	163	75	19	2	2	#NULL!	1	2	1	1	5	#NULL!	1	1	5	2		1	76	0	4	1	1	5	1	5	1	3	1	3	1	1	1	5	3	4	5	2	5	5	3	2	2	1
2021-07-11 21:08:19	2021-07-11 21:26:28	100	1	1	26	164	62	16	2	2	#NULL!	1	2	1	4	5	5	2	2	8	2		3	#NULL!	1	5	1	4	2	2	3	3	2	4	3	1	2	5	1	1	1	2	1	3	1	1	1	1	1
2021-07-11 20:31:50	2021-07-11 21:42:49	100	1	1	65	161	58	13	2	2	1978	4	2	1	1	5	5	2	2	8	2		2	#NULL!	0	5	3	3	3	3	3	3	2	2	3	2	3	5	5	4	5	5	3	5	5	3	2	3	2
2021-07-11 21:47:52	2021-07-11 22:00:39	100	1	1	36	152	46	14	2	2	#NULL!	1	3	1	3	5	#NULL!	2	2	8	2		4	#NULL!	0	5	4	4	5	5	5	2	4	2	3	1	2	5	5	3	5	5	5	3	5	3	3	3	4
2021-07-11 19:37:39	2021-07-11 22:17:39	100	1	1	32	162	54	16	2	2	#NULL!	1	2	1	1	5	5	2	2	8	2		3	#NULL!	0	3	1	4	3	3	2	3	2	3	3	2	2	1	2	2	1	3	1	3	1	2	1	1	1
2021-07-11 22:17:01	2021-07-11 22:27:28	100	1	1	29	162	59	17	2	2	1948	1	2	1	1	5	5	2	2	8	2		3	#NULL!	0	3	1	1	3	2	2	2	2	1	3	1	1	3	3	3	2	1	1	2	4	2	1	1	1
2021-07-11 22:01:30	2021-07-11 22:27:59	100	1	1	24	153	49	12	2	2	#NULL!	1	2	1	3	5	4	2	3	1	2		3	#NULL!	1	4	2	3	3	3	5	5	3	4	4	2	4	5	5	4	4	5	3	5	5	5	5	4	4
2021-07-11 21:53:55	2021-07-11 22:33:23	100	1	1	29	163	49	18	2	2	#NULL!	1	2	1	1	5	#NULL!	2	2	8	2		3	#NULL!	0	3	1	3	3	2	2	2	2	1	2	1	1	3	5	3	1	1	5	#NULL!	5	1	1	2	2
2021-07-11 22:28:53	2021-07-11 22:41:46	100	1	1	30	155	62	#NULL!	2	2	#NULL!	1	2	1	3	5	5	2	2	8	2		3	#NULL!	0	5	1	1	2	5	5	3	4	1	3	1	1	5	5	3	5	5	2	4	5	2	1	1	2
2021-07-11 22:21:47	2021-07-11 22:45:19	100	1	1	48	168	68	18	2	2	#NULL!	1	2	1	4	5	#NULL!	2	2	8	2		4	50	0	3	1	3	2	2	2	3	2	3	2	2	2	5	4	2	2	1	1	3	2	2	2	2	2
2021-07-11 22:40:16	2021-07-11 22:49:15	100	1	1	28	160	65	12	2	2	#NULL!	1	3	1	3	5	#NULL!	2	3	8	2		3	#NULL!	0	5	3	5	2	3	1	3	3	4	3	2	2	5	5	5	5	5	5	2	5	2	1	1	1
2021-07-11 22:58:10	2021-07-11 23:15:29	100	1	1	25	155	65	14	2	2	#NULL!	1	2	1	3	5	5	2	2	8	2		3	#NULL!	0	4	1	2	4	3	4	1	4	3	4	3	3	4	5	4	3	3	2	5	5	4	2	1	1
2021-07-11 22:40:43	2021-07-11 23:22:26	100	1	1	33	165	58	17	2	2	2017	4	2	1	1	5	5	2	2	8	2		3	#NULL!	0	3	2	1	3	3	2	3	2	2	2	3	2	1	3	1	2	1	1	2	3	4	1	1	2
2021-07-11 23:18:23	2021-07-11 23:41:29	100	1	1	60	168	77	19	2	2	#NULL!	6	2	1	1	5	#NULL!	2	1	2	2		2	#NULL!	1	5	3	3	4	4	4	4	4	2	3	1	2	2	5	4	3	5	4	5	5	4	2	1	3
2021-07-11 23:38:48	2021-07-11 23:50:02	100	1	1	33	160	100	16	2	2	#NULL!	1	2	1	1	5	#NULL!	2	2	8	2		3	#NULL!	0	4	3	1	2	4	3	1	2	1	2	1	1	5	5	5	5	5	4	5	4	4	2	1	3
2021-07-11 23:37:13	2021-07-11 23:51:29	100	1	1	59	171	70	18	2	2	#NULL!	1	2	1	2	5	#NULL!	2	2	#NULL!	2		#NULL!	0	0	2	1	1	1	2	2	2	1	2	2	3	3	5	5	5	4	5	5	5	5	4	3	1	3
2021-07-11 23:44:19	2021-07-12 00:01:28	100	1	1	31	172	73	15	2	2	#NULL!	6	2	1	1	5	5	2	2	8	2		3	0	0	3	1	1	3	3	3	3	3	2	3	1	1	1	3	2	1	1	2	4	5	2	1	1	2
2021-07-11 23:37:47	2021-07-12 00:01:40	100	1	1	26	169	53	15	2	2	#NULL!	1	2	1	4	5	2	2	1	1	1	HPA	1	20	0	4	2	3	3	3	5	4	5	3	3	2	3	5	5	4	2	4	2	2	5	3	2	1	2
2021-07-12 01:32:01	2021-07-12 01:56:13	100	1	1	62	164	67	17	2	2	#NULL!	1	2	1	4	5	#NULL!	2	2	8	2		3	#NULL!	0	4	1	1	3	3	2	3	2	3	4	2	2	1	2	1	1	2	1	2	3	2	1	3	3
2021-07-12 01:52:19	2021-07-12 02:04:45	100	1	1	26	164	66	#NULL!	2	2	#NULL!	1	2	1	4	5	5	2	1	5	1	asthma	1	25	0	4	1	1	2	3	3	2	2	1	3	1	1	4	1	3	4	4	4	5	3	3	1	1	1
2021-07-12 02:43:28	2021-07-12 02:56:17	100	1	1	26	160	50	16	2	2	1948	1	2	1	4	5	#NULL!	2	3	4	1	asthma	2	0	1	5	1	4	5	5	5	5	3	4	5	2	4	5	3	2	2	2	5	5	5	1	4	2	2
2021-07-12 02:54:43	2021-07-12 03:18:12	100	1	1	26	163	64	15	2	2	#NULL!	1	2	1	4	5	4	2	2	8	1	psoriasis	4	60	1	5	1	4	4	4	4	4	4	3	4	1	3	5	5	3	2	4	5	5	5	4	3	3	2
2021-07-12 02:50:04	2021-07-12 03:19:24	100	1	1	29	159	75	16	2	2	#NULL!	1	3	1	4	5	1	1	1	5	1	a moderate depressive episode and ADHD	1	14	1	5	2	3	4	1	5	5	3	5	5	3	5	5	5	5	1	5	1	5	5	5	4	1	3
2021-07-12 07:32:03	2021-07-12 07:47:56	100	1	1	49	163	78	17	2	2	#NULL!	1	1	1	1	5	1	2	2	8	2		#NULL!	0	0	5	5	5	5	5	5	5	5	5	4	3	4	5	5	4	5	2	4	2	5	4	3	2	5
2021-07-12 08:42:46	2021-07-12 08:54:25	100	1	1	25	142	42	16	2	2	#NULL!	1	2	1	3	5	5	2	2	8	2		3	#NULL!	0	4	1	1	3	3	4	2	3	5	5	1	1	5	5	1	2	4	4	4	5	1	1	1	1
2021-07-12 09:01:57	2021-07-12 09:17:01	100	1	1	33	167	57	15	2	2	#NULL!	1	2	1	3	5	#NULL!	2	2	1	1	colitis	4	38	1	5	1	5	5	5	5	5	5	3	3	1	1	5	5	5	5	4	1	4	5	2	1	2	3
2021-07-12 10:39:48	2021-07-12 10:56:07	100	1	1	32	160	54	18	2	2	#NULL!	1	2	1	1	5	#NULL!	2	2	1	1	hypo-thyrodism	1	#NULL!	0	3	1	3	3	3	3	1	3	3	3	1	1	5	5	3	4	2	5	3	5	5	3	2	3
2021-07-12 13:27:02	2021-07-12 13:42:46	100	1	1	32	165	115	17	2	1	2004	5	2	1	4	5	5	3	3	9	1	Adhd	1	49	0	4	1	2	3	4	3	2	2	2	2	2	2	4	4	2	2	1	1	3	1	1	4	2	2
2021-07-12 13:41:10	2021-07-12 13:51:37	100	1	1	24	164	72	15	2	2	#NULL!	1	2	1	4	5	5	2	2	8	2		3	#NULL!	1	3	1	2	3	2	3	3	3	3	3	1	2	4	4	1	3	5	2	5	2	4	5	3	3
2021-07-12 14:04:19	2021-07-12 14:15:22	100	1	1	26	170	102	15	2	2	#NULL!	1	2	1	3	5	#NULL!	2	2	9	2		4	0	1	5	1	5	5	5	5	5	4	5	5	3	3	5	5	4	5	5	5	5	5	3	5	3	2
2021-07-12 14:15:42	2021-07-12 14:30:29	100	1	1	21	168	95	13	2	2	#NULL!	1	2	1	3	5	#NULL!	2	1	1	2		2	#NULL!	1	4	2	1	2	4	3	2	2	2	3	2	3	5	4	4	5	2	5	5	5	3	4	2	1
2021-07-12 14:18:38	2021-07-12 14:30:53	100	1	1	26	170	84	16	2	2	#NULL!	1	2	1	3	5	5	2	2	4	1	a mild asthma in childhood	2	#NULL!	0	3	2	4	3	3	3	4	3	4	3	3	2	4	4	3	3	3	3	3	5	2	2	4	2
2021-07-12 14:15:53	2021-07-12 14:31:05	100	1	1	38	160	73	20	2	2	#NULL!	1	2	1	1	5	#NULL!	2	2	8	1	Krohn's disease	4	15	1	4	2	3	3	2	4	2	3	2	3	4	4	3	4	2	4	4	5	4	5	4	4	2	1
2021-07-12 14:20:58	2021-07-12 14:31:32	100	1	1	24	150	44	12	2	2	#NULL!	1	2	1	4	5	4	3	2	8	2		3	#NULL!	1	4	2	2	4	2	4	2	3	2	4	2	2	5	5	3	5	5	5	5	5	3	2	2	3
2021-07-12 14:17:16	2021-07-12 14:32:43	100	1	1	27	166	54	15	2	2	#NULL!	1	2	1	3	5	#NULL!	2	2	8	2		#NULL!	#NULL!	1	4	1	1	3	2	5	2	3	3	3	1	1	5	5	1	4	5	1	5	5	3	3	1	3
2021-07-12 14:20:19	2021-07-12 14:33:21	100	1	1	24	169	74	12	2	2	#NULL!	1	2	1	4	5	5	1	2	8	2		3	#NULL!	1	3	1	4	2	3	3	5	2	2	2	1	2	2	3	2	3	3	2	3	5	2	2	1	3
2021-07-12 13:46:56	2021-07-12 14:41:06	100	1	1	28	162	66	18	2	2	#NULL!	1	2	1	4	5	4	2	2	5	2		3	#NULL!	1	4	1	2	4	4	5	1	5	1	5	2	1	3	5	4	3	2	1	3	2	3	4	2	3
2021-07-12 14:20:57	2021-07-12 14:43:06	100	1	1	26	157	66	15	2	2	#NULL!	1	2	1	4	5	2	2	1	4	1	high blood pressure, high colesterol fatty liver	1	15	1	3	1	2	2	2	3	4	2	3	2	1	2	1	5	1	2	4	1	1	3	3	2	2	1
2021-07-12 14:22:02	2021-07-12 14:50:01	100	1	1	26	160	49	15	2	2	#NULL!	1	2	1	4	5	#NULL!	2	2	#NULL!	2		#NULL!	#NULL!	0	3	1	2	3	4	3	4	3	3	3	1	1	2	5	5	5	5	1	5	5	3	1	1	5
2021-07-12 14:47:00	2021-07-12 14:55:54	100	1	1	30	163	117	17	2	2	#NULL!	1	2	1	1	5	4	2	1	4	1	asthma	2	#NULL!	1	5	1	4	5	5	3	5	5	3	5	4	4	5	4	4	5	5	5	5	5	3	4	2	3
2021-07-12 15:05:11	2021-07-12 15:16:54	100	1	1	30	164	63	17	2	2	#NULL!	1	2	1	3	5	#NULL!	2	2	8	1	anemia	4	15	0	4	3	3	3	3	3	3	3	4	3	2	2	4	5	3	5	4	2	3	5	2	3	1	2
2021-07-12 15:08:19	2021-07-12 15:17:46	100	1	1	29	150	52	17	2	2	#NULL!	1	2	1	1	5	5	2	2	8	2		3	#NULL!	0	5	1	4	4	4	5	5	4	3	4	1	4	3	5	3	5	4	4	3	5	2	4	2	2
2021-07-12 15:01:40	2021-07-12 15:18:10	100	1	1	47	168	66	14	2	2	#NULL!	1	3	1	1	5	#NULL!	2	2	8	2		3	#NULL!	0	3	1	1	3	3	4	3	2	4	4	2	1	5	5	4	5	1	3	1	5	3	4	1	4
2021-07-12 15:03:20	2021-07-12 15:23:45	100	1	1	36	156	58	19	2	2	#NULL!	1	2	1	1	5	5	2	2	8	1	colitis	4	24	1	4	2	3	3	4	2	3	2	2	3	1	1	5	3	2	1	3	5	3	2	2	2	2	3
2021-07-12 15:00:32	2021-07-12 15:30:42	100	1	1	36	168	56	12	2	2	#NULL!	1	3	1	1	5	4	2	2	8	2		3	0	0	3	1	1	2	2	3	2	2	3	2	1	1	1	5	3	1	2	1	3	5	2	1	2	1
2021-07-12 15:43:14	2021-07-12 16:02:47	100	1	1	23	161	52	16	2	2	#NULL!	3	2	2	4	5	4	2	1	2	1	anemia	2	#NULL!	1	5	2	5	3	5	4	5	3	4	4	1	3	5	5	5	5	5	5	5	5	3	2	1	4
2021-07-12 15:58:19	2021-07-12 16:13:29	100	1	1	22	155	47	15	2	2	#NULL!	3	2	4	4	5	5	2	2	9	2		3	0	0	5	4	2	3	3	5	2	4	3	3	3	1	5	3	3	5	5	3	5	5	1	1	1	2
2021-07-12 11:48:00	2021-07-12 16:13:45	100	1	1	32	156	66	17	2	2	#NULL!	1	2	1	1	5	5	2	2	8	2		3	#NULL!	0	4	2	3	3	3	3	4	3	4	3	2	3	2	2	1	2	1	1	3	4	2	1	1	2
2021-07-12 17:06:46	2021-07-12 17:24:20	100	1	1	24	167	57	15	2	2	#NULL!	3	3	3	3	5	5	2	2	8	2		3	#NULL!	1	5	3	3	4	5	4	4	4	2	4	2	3	5	5	3	4	3	2	4	5	3	4	3	2
2021-07-12 17:25:13	2021-07-12 17:54:29	100	1	1	27	162	71	17	2	2	#NULL!	1	2	1	3	5	5	2	2	9	2		4	20	0	4	1	3	3	3	3	5	2	3	3	2	2	2	4	2	3	3	1	5	4	2	2	2	2
2021-07-12 17:59:47	2021-07-12 18:09:47	100	1	1	24	173	55	12	2	2	#NULL!	1	2	1	4	5	4	2	1	5	2		3	#NULL!	1	5	1	4	5	3	4	5	3	4	3	1	2	5	5	2	4	5	4	5	5	4	4	4	2
2021-07-12 18:16:21	2021-07-12 18:25:56	100	1	1	32	170	58	17	2	2	#NULL!	1	2	1	1	5	5	2	2	8	2		3	#NULL!	0	2	1	2	3	3	3	2	3	1	3	1	1	4	4	3	3	4	#NULL!	4	4	3	2	2	1
2021-07-12 18:29:23	2021-07-12 18:40:39	100	1	1	26	165	70	17	2	2	#NULL!	1	2	1	3	5	4	2	2	8	2		3	#NULL!	1	4	3	4	4	5	4	4	4	2	5	4	4	5	5	4	4	4	5	5	5	4	4	4	2
2021-07-12 18:33:42	2021-07-12 18:45:44	100	1	1	32	159	80	16	2	2	1948	1	2	1	4	5	#NULL!	2	1	4	1	a congenital lung problem	1	70	1	3	2	4	3	4	3	4	3	3	3	2	3	3	2	1	2	4	5	4	4	2	2	1	2
2021-07-12 18:59:49	2021-07-12 19:10:22	100	1	1	43	154	66	16	2	2	#NULL!	1	2	1	1	5	5	2	2	2	2		3	#NULL!	1	3	2	1	4	2	2	3	2	4	1	4	3	2	3	2	3	5	4	5	5	1	1	2	1
2021-07-12 19:40:20	2021-07-12 19:54:59	100	1	1	25	150	45	14	2	2	#NULL!	1	2	1	4	5	4	2	1	8	1	IBS	4	22	1	4	1	1	2	3	2	2	3	3	3	2	2	5	1	4	5	5	3	4	5	2	1	1	2
2021-07-12 20:18:44	2021-07-12 20:30:14	100	1	1	20	160	64	14	2	2	#NULL!	1	2	1	4	5	#NULL!	2	2	8	2		3	#NULL!	0	3	1	4	4	4	4	5	4	4	3	2	2	2	3	1	3	5	1	4	5	2	1	2	2
2021-07-12 20:43:54	2021-07-12 20:57:09	100	1	1	25	163	49	15	2	2	#NULL!	1	2	1	4	5	5	2	2	8	2		3	#NULL!	0	3	1	3	2	4	3	3	2	3	2	1	1	3	4	4	5	4	1	4	5	3	1	1	2
2021-07-12 20:59:53	2021-07-12 21:07:40	100	1	1	24	164	53	14	2	2	#NULL!	4	2	1	4	5	#NULL!	2	1	8	1	psoriasis	4	10	1	4	3	3	3	3	3	4	3	2	3	2	3	3	2	2	3	2	3	3	5	2	3	4	3
2021-07-12 16:23:00	2021-07-12 21:28:19	100	1	1	24	161	69	15	2	2	#NULL!	3	2	4	3	5	5	2	2	1	2		3	#NULL!	1	4	1	3	2	3	3	3	3	3	3	2	1	4	5	4	3	2	2	4	5	1	2	2	2
2021-07-12 21:16:44	2021-07-12 21:28:22	100	1	1	30	162	58	15	2	2	#NULL!	1	2	1	3	5	5	2	2	8	2		3	#NULL!	0	5	1	1	2	3	3	2	3	2	3	2	2	5	5	2	2	3	2	4	5	3	1	1	5
2021-07-12 21:37:18	2021-07-12 21:47:34	100	1	1	26	173	51	15	2	2	#NULL!	1	2	1	3	5	5	2	2	8	2		3	0	1	4	2	4	4	4	5	3	4	5	4	2	3	5	5	4	2	5	4	#NULL!	5	4	3	2	2
2021-07-12 22:17:52	2021-07-12 22:27:37	100	1	1	37	165	70	16	2	2	#NULL!	1	2	1	4	5	5	2	2	8	2		2	0	0	4	2	1	2	3	4	4	3	5	5	1	1	5	4	1	4	5	1	3	5	3	1	3	2
2021-07-12 22:30:27	2021-07-12 22:51:15	100	1	1	36	163	67	20	2	2	#NULL!	1	2	1	1	5	5	2	2	8	2		3	#NULL!	0	5	2	2	2	3	3	2	#NULL!	3	3	1	2	5	5	3	4	5	2	5	5	1	1	2	3
2021-07-12 22:38:13	2021-07-12 23:00:49	100	1	1	22	175	73	15	2	2	#NULL!	3	3	3	3	5	5	2	2	8	2		3	#NULL!	0	3	3	4	3	3	3	5	3	2	3	1	2	5	2	5	2	1	3	1	4	2	1	1	2
2021-07-12 23:02:51	2021-07-12 23:14:31	100	1	1	32	167	61	17	2	2	#NULL!	1	2	1	4	5	#NULL!	2	2	4	1	asthma	1	23	1	4	1	2	3	3	3	2	3	1	3	1	2	5	2	2	4	1	5	4	5	2	2	1	2
2021-07-12 23:00:40	2021-07-12 23:20:25	100	1	1	25	167	49	14	2	2	#NULL!	1	2	1	3	5	4	2	2	8	1	wpw	4	0	1	5	2	3	5	4	5	2	5	2	4	2	1	5	5	4	1	5	5	5	5	3	2	1	1
2021-07-12 23:11:21	2021-07-12 23:21:05	100	1	1	29	160	56	17	2	2	#NULL!	1	2	1	4	5	5	2	2	5	2		1	12	0	4	1	2	3	3	4	4	2	2	3	2	2	2	4	1	1	2	5	2	3	3	2	2	3
2021-07-12 23:07:51	2021-07-12 23:22:08	100	1	1	35	152	53	17	2	2	#NULL!	1	2	1	1	5	5	2	2	8	2		3	#NULL!	0	3	2	2	2	3	2	2	2	3	3	1	1	4	3	4	2	3	4	5	3	2	1	1	3
2021-07-12 23:17:50	2021-07-12 23:30:10	100	1	1	26	164	78	15	2	2	#NULL!	1	2	1	4	5	5	2	2	8	2		3	0	0	3	1	2	3	3	3	4	3	3	3	2	1	5	4	2	4	4	5	4	5	3	3	3	2
2021-07-12 23:28:52	2021-07-12 23:48:12	100	1	1	29	157	52	#NULL!	2	2	#NULL!	1	2	1	3	5	5	2	1	8	2		2	#NULL!	1	4	1	2	3	4	3	4	3	4	4	2	3	4	5	4	4	5	3	5	5	4	2	1	2
2021-07-12 23:34:51	2021-07-12 23:56:12	100	1	1	29	154	67	16	2	2	#NULL!	1	2	1	1	5	#NULL!	2	2	1	2		1	70	0	4	1	1	2	4	4	4	3	3	3	1	1	4	5	4	3	3	2	5	5	2	3	1	3
2021-07-12 23:54:14	2021-07-13 00:04:30	100	1	1	44	165	58	17	2	2	1948	1	2	1	1	5	5	2	1	8	2		3	#NULL!	1	5	1	1	3	3	3	3	3	3	3	2	2	5	4	3	5	5	5	3	5	3	3	2	3
2021-07-12 23:44:55	2021-07-13 00:08:10	100	1	1	25	162	55	12	2	2	1948	1	2	1	3	5	4	2	3	1	2		3	0	1	5	1	3	4	5	3	2	3	3	3	2	3	5	4	4	3	3	2	5	4	4	4	3	2
2021-07-13 00:23:04	2021-07-13 00:36:49	100	1	1	45	168	94	17	2	2	#NULL!	1	2	1	1	5	#NULL!	2	2	7	2		1	30	1	4	1	2	3	3	1	2	2	2	3	2	2	1	3	3	1	3	1	3	5	2	3	2	3
2021-07-13 00:54:29	2021-07-13 01:17:33	100	1	1	37	158	52	20	2	2	#NULL!	1	2	5	1	5	5	2	2	4	1	asthma; a heart murmur	2	#NULL!	0	5	1	1	4	3	4	5	4	1	4	1	1	5	4	1	4	5	1	5	5	2	1	1	3
2021-07-13 02:51:44	2021-07-13 03:01:40	100	1	1	25	166	84	15	2	2	#NULL!	1	2	1	3	5	5	2	2	8	2		3	#NULL!	0	4	1	1	2	2	3	2	2	2	2	1	2	4	4	3	3	3	1	2	5	3	2	2	1
2021-07-13 04:37:47	2021-07-13 04:53:13	100	1	1	46	161	56	23	2	2	#NULL!	1	2	1	1	5	4	2	1	8	2		3	#NULL!	0	4	1	2	3	2	4	4	2	3	2	1	2	4	3	1	4	5	3	5	4	2	1	1	3
2021-07-13 05:00:48	2021-07-13 05:09:09	100	1	1	41	163	89	18	2	2	#NULL!	2	2	1	3	5	#NULL!	2	2	5	1	hypo-thyrodism	4	38	0	3	1	1	3	3	3	1	3	1	3	1	1	2	3	1	1	1	1	2	4	1	1	1	1
2021-07-13 09:58:08	2021-07-13 10:10:28	100	1	1	23	170	53	14	2	2	#NULL!	1	1	1	1	5	4	2	2	8	2		3	#NULL!	0	2	1	1	1	2	1	1	2	1	2	1	1	5	5	3	5	5	5	5	5	2	2	1	1
2021-07-13 10:12:19	2021-07-13 10:23:15	100	1	1	25	167	61	13	2	2	#NULL!	1	2	1	4	5	#NULL!	2	2	9	2		3	#NULL!	1	4	1	2	3	3	3	3	3	2	3	2	2	5	5	4	4	4	4	4	5	4	3	2	2
2021-07-13 10:58:37	2021-07-13 11:34:14	100	1	1	38	165	58	17	2	2	#NULL!	1	2	1	1	5	2	2	2	8	2		3	#NULL!	0	4	1	1	4	2	3	2	2	3	3	1	1	2	2	3	3	4	4	5	2	3	1	1	1
2021-07-13 12:07:55	2021-07-13 12:32:41	100	1	1	28	166	56	13	2	2	#NULL!	2	3	1	4	5	4	2	2	8	2		3	#NULL!	1	5	1	3	5	4	5	4	4	4	5	3	1	5	2	3	2	5	5	5	5	2	3	4	4
2021-07-13 12:45:49	2021-07-13 13:00:12	100	1	1	28	164	62	17	2	2	#NULL!	1	2	1	4	5	5	2	2	8	1	epilepsy	4	5	0	3	1	2	2	3	5	2	3	4	3	1	1	4	4	2	1	2	3	4	2	3	1	2	4
2021-07-13 14:33:34	2021-07-13 14:43:50	100	1	1	23	169	65	15	2	2	#NULL!	1	2	1	4	5	5	2	2	1	1	Adhd	1	50	0	4	2	4	2	2	2	5	3	4	4	1	5	3	3	2	1	4	1	5	5	3	1	1	1
2021-07-11 17:13:15	2021-07-13 14:53:22	100	1	1	29	160	45	16	2	2	2019	1	2	1	4	5	5	2	2	5	2		3	#NULL!	0	2	1	1	3	3	4	2	2	1	2	1	1	1	4	1	2	5	1	4	2	1	1	1	1
2021-07-13 15:13:20	2021-07-13 15:25:28	100	1	1	31	158	52	15	2	2	#NULL!	1	3	1	3	5	5	2	2	7	1	epliepsy	2	#NULL!	0	3	2	2	2	2	3	1	1	1	1	1	1	1	4	1	1	1	1	3	5	1	3	3	2
2021-07-12 16:39:54	2021-07-13 16:08:25	100	1	1	28	163	59	16	2	2	#NULL!	1	2	1	4	5	#NULL!	2	2	1	2		1	#NULL!	0	2	1	2	4	3	4	4	3	2	2	1	1	5	5	4	2	3	3	5	5	2	1	2	1
2021-07-13 17:18:31	2021-07-13 17:32:41	100	1	1	25	152	48	13	2	2	#NULL!	1	2	1	4	5	2	2	2	1	1	complications from a whooping cough vaccination that caused chronic coughing	1	15	0	3	1	2	2	2	3	2	2	3	2	1	1	5	3	1	1	1	1	1	4	2	1	2	1
2021-07-13 17:41:26	2021-07-13 18:02:25	100	1	1	26	168	60	14	2	2	1948	1	2	1	1	5	4	2	2	1	2		3	#NULL!	1	4	3	4	3	4	3	5	3	2	4	3	3	5	4	4	3	4	5	5	5	4	4	2	2
2021-07-13 18:11:18	2021-07-13 18:22:00	100	1	1	40	173	78	17	2	2	#NULL!	1	2	1	1	5	#NULL!	2	2	8	2		3	#NULL!	0	5	1	1	3	2	3	3	3	3	3	1	3	5	4	2	2	1	1	2	3	2	1	3	3
2021-07-13 19:10:27	2021-07-13 19:20:43	100	1	1	25	162	48	16	2	2	#NULL!	1	3	1	3	5	5	2	2	8	2		3	#NULL!	0	3	1	5	2	3	3	5	3	5	3	1	1	5	5	2	2	2	3	4	5	4	4	1	4
2021-07-13 20:56:48	2021-07-13 21:54:43	100	1	1	28	160	56	16	2	2	#NULL!	1	2	1	4	5	5	2	2	8	2		3	#NULL!	1	3	1	5	2	2	2	5	2	5	1	1	1	3	5	1	4	5	1	5	5	3	1	3	5
2021-07-14 00:47:10	2021-07-14 00:56:42	100	1	1	23	157	48	14	2	2	#NULL!	1	2	1	1	5	#NULL!	2	2	7	1	hypothyrodism	2	#NULL!	0	3	1	1	1	3	2	2	2	1	1	#NULL!	1	2	5	3	1	2	1	3	3	1	1	1	1
2021-07-14 01:23:17	2021-07-14 01:38:44	100	1	1	24	174	95	12	2	2	#NULL!	1	2	1	4	5	5	2	2	5	2		4	20	0	4	2	1	3	2	3	3	3	3	3	1	2	3	5	3	3	5	5	5	5	3	1	3	2
2021-07-14 10:39:59	2021-07-14 10:53:35	100	1	1	26	165	81	17	2	2	1948	1	2	1	4	5	5	2	3	5	2		1	60	0	5	1	2	5	5	5	2	3	2	4	1	4	4	5	4	5	3	3	5	5	4	4	1	3
2021-07-14 12:37:49	2021-07-14 12:46:50	100	1	1	25	164	51	16	2	2	#NULL!	1	3	1	4	5	#NULL!	2	2	8	2		3	#NULL!	1	5	2	2	3	3	4	2	4	2	5	1	1	3	5	4	1	3	1	4	5	4	2	3	2
2021-07-14 15:39:40	2021-07-14 16:06:14	100	1	1	25	168	73	16	2	1	2014	4	2	5	3	5	4	2	2	5	2		1	40	1	5	2	2	3	3	4	4	3	4	4	4	3	1	3	4	3	2	2	2	5	4	4	4	3
2021-07-14 17:39:10	2021-07-14 18:01:49	100	1	1	28	163	71	16	2	2	#NULL!	1	2	1	4	5	4	2	1	2	1	IBS	1	20	1	4	1	1	2	2	3	3	2	2	3	3	2	5	4	2	4	4	5	5	4	2	5	3	5
2021-07-14 22:22:49	2021-07-14 22:39:29	100	1	1	21	160	51	13	2	2	#NULL!	1	3	1	3	5	4	2	2	4	1	diabetes 1	1	20	1	4	3	3	4	3	4	4	3	3	4	3	3	4	5	4	4	5	4	5	5	5	5	3	4
2021-07-15 02:52:46	2021-07-15 03:10:19	100	1	1	25	158	53	13	2	2	#NULL!	1	2	1	3	5	4	1	2	7	1	toticollis	2	#NULL!	1	4	1	3	4	3	5	3	3	3	3	3	4	3	4	3	3	3	2	4	5	2	2	1	3
2021-07-15 02:53:52	2021-07-15 03:10:27	100	1	1	27	0	0	12	2	2	#NULL!	1	2	1	3	5	4	2	2	1	2		3	0	1	4	1	2	3	5	4	5	4	3	4	3	3	4	5	3	4	4	5	4	5	3	4	3	4
2021-07-15 11:42:59	2021-07-15 11:54:27	100	1	1	39	165	77	15	2	2	#NULL!	1	2	1	1	5	4	2	1	8	2		#NULL!	#NULL!	1	5	1	3	3	2	2	2	4	2	3	1	2	4	3	2	3	2	5	3	3	2	3	2	3
2021-07-15 12:19:50	2021-07-15 12:29:16	100	1	1	28	153	50	16	2	2	#NULL!	1	2	1	1	5	4	2	1	8	2		3	#NULL!	1	4	2	2	2	3	3	3	3	3	3	2	3	2	5	2	3	4	1	3	5	1	2	1	2
2021-07-15 16:20:18	2021-07-15 16:28:42	100	1	1	23	160	61	12	2	2	#NULL!	1	2	1	4	5	4	2	2	1	2		2	#NULL!	1	5	1	5	5	3	5	5	3	5	5	3	5	1	1	1	1	5	1	5	3	4	4	3	5
2021-07-15 20:43:50	2021-07-15 20:52:41	100	1	1	26	158	47	13	2	2	#NULL!	1	2	1	4	5	#NULL!	2	2	1	1	Adhd	1	31	0	4	1	2	3	3	4	1	3	2	3	1	2	4	3	5	4	4	3	2	5	4	2	2	3
2021-07-16 17:37:47	2021-07-16 17:55:00	100	1	1	27	174	76	17	2	2	#NULL!	1	2	1	4	5	4	2	2	8	2		3	#NULL!	1	4	1	1	3	4	4	4	4	3	4	3	4	5	4	4	5	4	3	4	5	3	4	4	4
2021-07-16 18:51:26	2021-07-16 19:13:22	100	1	1	25	158	70	15	2	2	#NULL!	1	3	1	3	5	4	2	2	8	2		4	#NULL!	0	3	2	4	3	4	4	4	4	3	3	2	2	4	5	4	1	3	1	5	5	3	3	2	3
2021-07-16 21:19:37	2021-07-16 21:32:33	100	1	1	42	161	50	18	2	2	#NULL!	1	2	1	4	5	#NULL!	2	2	8	2		3	#NULL!	0	3	1	1	3	2	3	3	2	2	3	1	1	3	5	5	1	5	1	5	3	2	1	1	2
2021-07-16 21:37:52	2021-07-16 21:52:11	100	1	1	22	170	58	12	2	2	#NULL!	1	2	1	4	5	5	2	2	2	1		1	20	1	4	1	2	2	1	5	3	4	1	5	2	2	5	5	5	5	4	5	5	5	4	1	1	1
2021-07-16 22:59:00	2021-07-16 23:05:13	100	1	1	24	151	82	14	2	2	#NULL!	1	2	1	4	5	5	2	2	1	2		3	#NULL!	1	5	5	5	5	5	4	5	5	2	5	1	4	5	4	5	1	5	5	5	5	4	1	1	5
2021-07-17 01:28:25	2021-07-17 02:04:35	100	1	1	21	157	58	13	2	2	#NULL!	3	1	2	3	5	5	2	2	3	2		3	#NULL!	0	5	1	3	3	3	5	2	3	1	4	2	2	1	5	3	2	1	1	2	5	1	2	2	5
2021-07-17 11:38:30	2021-07-17 11:49:45	100	1	1	29	170	66	18	2	2	#NULL!	1	3	1	1	5	#NULL!	2	2	8	2		4	#NULL!	0	4	2	1	2	3	3	1	2	3	3	1	2	3	4	2	5	2	1	5	5	3	4	4	3
2021-07-17 22:28:19	2021-07-17 22:49:55	100	1	1	76	164	71	23	2	2	#NULL!	2	2	1	2	5	5	2	1	9	1	ADHD, depression, anxieties and CPTSD	4	62	0	5	1	1	3	4	4	1	3	2	5	3	2	1	4	1	5	3	1	5	5	2	1	1	1
2021-07-18 16:18:25	2021-07-18 16:26:38	100	1	1	26	150	45	15	2	2	#NULL!	1	2	1	4	5	4	2	2	7	1	childhood asthma	2	#NULL!	1	4	2	5	3	3	4	5	3	4	4	2	3	5	3	4	4	3	3	5	5	4	4	3	3
2021-07-18 16:39:32	2021-07-18 16:49:02	100	1	1	25	150	57	17	2	2	#NULL!	1	2	1	1	5	4	2	2	3	2		2	#NULL!	1	5	3	1	3	4	4	5	3	5	3	1	3	5	5	1	4	1	1	5	5	3	2	1	1
2021-07-18 16:33:46	2021-07-18 16:49:52	100	1	1	36	162	99	21	2	2	1948	1	2	1	4	5	3	2	2	8	2		3	#NULL!	0	3	1	1	2	2	2	1	2	3	2	1	1	5	4	1	1	3	4	5	4	2	2	3	2
2021-07-18 16:44:52	2021-07-18 16:58:56	100	1	1	24	161	54	12	2	2	#NULL!	1	2	1	1	5	#NULL!	2	2	8	2		3	#NULL!	1	5	1	1	3	4	4	5	3	1	2	1	1	5	5	5	5	5	5	5	5	4	5	2	4
2021-07-18 16:57:41	2021-07-18 17:08:59	100	1	1	31	173	55	17	2	2	#NULL!	1	2	1	3	5	5	2	2	5	2		1	21	0	4	2	1	3	3	4	2	3	1	3	2	1	3	3	2	1	2	3	2	5	3	2	3	2
2021-07-18 16:54:35	2021-07-18 17:10:59	100	1	1	31	168	60	16	2	1	1993	1	2	1	4	5	5	2	2	9	2		4	39	0	4	1	3	4	3	5	3	4	3	4	1	1	2	4	2	1	2	1	2	5	2	2	2	2
2021-07-18 17:02:30	2021-07-18 17:16:27	100	1	1	22	160	72	12	2	2	#NULL!	1	2	1	4	5	5	2	2	8	2		4	#NULL!	1	5	2	3	4	5	5	5	5	3	5	2	4	5	5	3	4	5	5	5	5	5	5	2	5
2021-07-18 17:10:52	2021-07-18 17:25:56	100	1	1	24	161	70	14	2	2	#NULL!	1	2	1	3	5	2	2	1	9	2		4	85	1	4	3	5	3	3	4	5	3	3	3	1	4	4	5	3	4	4	3	4	5	2	2	2	2
2021-07-18 17:25:43	2021-07-18 17:38:02	100	1	1	29	172	57	15	2	2	#NULL!	1	2	1	1	5	4	2	1	5	2		1	50	1	5	1	2	4	2	3	2	3	2	4	3	4	4	5	5	4	5	4	5	5	4	5	3	3
2021-07-18 17:34:35	2021-07-18 17:47:39	100	1	1	27	160	52	14	2	2	#NULL!	1	2	1	4	5	5	2	3	8	2		3	#NULL!	0	2	1	1	2	2	1	2	2	3	2	2	1	1	4	4	4	5	1	2	3	4	2	2	3
2021-07-18 17:42:54	2021-07-18 17:53:17	100	1	1	38	160	65	25	2	2	#NULL!	1	2	5	1	5	#NULL!	2	2	8	2		3	#NULL!	0	4	3	2	3	4	2	1	2	1	2	1	1	4	4	1	1	2	1	1	4	1	1	1	2
2021-07-18 17:45:45	2021-07-18 17:57:48	100	1	1	23	157	48	12	2	2	#NULL!	1	2	1	4	5	#NULL!	2	1	9	2		3	#NULL!	1	5	1	4	4	3	4	2	4	3	4	3	3	5	4	3	5	3	5	3	5	4	5	4	3
2021-07-18 17:51:06	2021-07-18 18:03:20	100	1	1	37	168	53	21	2	2	#NULL!	1	2	1	1	5	5	2	2	8	2		3	#NULL!	1	3	1	3	2	1	4	1	2	3	3	2	4	5	4	3	3	3	5	4	5	3	3	3	4
2021-07-18 17:55:32	2021-07-18 18:05:06	100	1	1	21	158	61	13	2	2	#NULL!	1	2	1	4	5	5	2	2	8	2		3	#NULL!	0	5	1	1	2	3	3	2	5	2	3	1	1	4	5	3	5	3	3	4	5	4	1	2	3
2021-07-18 17:52:12	2021-07-18 18:10:13	100	1	1	25	167	62	14	2	2	#NULL!	1	2	1	3	5	#NULL!	2	2	4	1	hyronephrosis ; scerliosis	1	45	0	2	2	3	2	2	2	2	2	4	2	1	1	2	4	2	5	4	1	4	5	1	1	1	3
2021-07-18 18:06:18	2021-07-18 18:18:10	100	1	1	25	155	66	15	2	2	#NULL!	1	2	1	3	5	4	2	2	1	2		1	45	1	4	1	4	4	5	4	3	3	3	4	3	3	2	5	4	1	4	1	5	5	4	3	3	3
2021-07-18 18:12:38	2021-07-18 18:22:38	100	1	1	47	158	66	18	2	2	#NULL!	1	2	1	1	5	5	2	2	8	2		3	#NULL!	0	5	1	1	2	2	3	2	2	1	2	2	1	1	2	#NULL!	1	1	1	2	4	1	1	1	2
2021-07-18 18:10:15	2021-07-18 18:24:02	100	1	1	23	175	61	15	2	2	#NULL!	1	2	1	4	5	4	2	3	2	2		1	30	1	4	1	1	3	3	4	2	3	4	5	1	1	5	5	5	5	5	5	5	5	4	5	2	2
2021-07-18 18:14:49	2021-07-18 18:24:35	100	1	1	25	170	70	15	2	2	#NULL!	4	2	1	3	5	#NULL!	2	2	8	2		3	#NULL!	1	5	1	1	3	2	4	#NULL!	4	1	5	1	1	3	1	1	1	1	1	3	2	1	4	2	1
2021-07-18 18:20:29	2021-07-18 18:30:17	100	1	1	34	175	67	17	2	2	#NULL!	1	2	1	4	5	4	2	2	8	2		3	#NULL!	0	3	1	2	1	2	1	2	2	2	2	1	1	4	3	2	1	2	3	5	4	3	2	3	3
2021-07-18 18:21:44	2021-07-18 18:34:51	100	1	1	23	163	61	#NULL!	2	2	#NULL!	1	2	1	4	5	#NULL!	2	2	8	2		4	10	0	5	2	2	3	3	3	4	2	4	2	1	3	4	5	2	3	4	1	4	1	1	1	1	3
2021-07-18 18:17:35	2021-07-18 18:35:32	100	1	1	36	170	83	20	2	2	#NULL!	1	2	1	1	5	5	2	2	8	2		4	#NULL!	0	5	1	3	2	3	3	3	2	5	2	3	2	5	5	5	5	5	5	5	5	1	1	1	5
2021-07-18 18:11:59	2021-07-18 18:36:42	100	1	1	60	163	84	15	2	2	#NULL!	1	2	1	5	5	#NULL!	1	1	4	1	hypo-thyrodism	1	10	1	3	1	4	2	3	3	4	3	4	3	3	2	5	5	5	4	4	1	4	5	2	2	2	3
2021-07-18 18:36:19	2021-07-18 18:45:14	100	1	1	30	165	58	16	2	2	#NULL!	1	2	1	4	5	5	2	2	3	2		3	#NULL!	1	4	1	1	3	2	4	1	3	1	3	2	2	1	2	1	3	5	5	2	4	3	2	1	1
2021-07-18 18:40:45	2021-07-18 18:49:52	100	1	1	27	157	61	16	2	2	1948	1	2	1	4	5	4	2	2	8	2		3	#NULL!	0	5	1	2	3	4	3	1	3	3	4	1	5	5	3	4	2	2	4	5	5	3	3	3	2
2021-07-18 18:40:50	2021-07-18 18:50:38	100	1	1	26	160	80	15	2	2	#NULL!	1	2	1	3	5	#NULL!	2	1	9	2		4	55	1	4	2	3	4	2	5	3	5	2	5	3	4	3	4	1	3	5	4	5	4	3	4	4	3
2021-07-18 18:48:44	2021-07-18 19:08:38	100	1	1	34	158	53	17	2	2	#NULL!	1	2	1	1	5	4	2	1	8	2	hypo-thyrodism, there is no connection	3	0	1	3	1	2	2	3	2	2	3	3	3	2	2	4	4	3	4	4	5	2	2	2	3	2	1
2021-07-18 18:59:07	2021-07-18 19:08:42	100	1	1	26	162	65	14	2	2	#NULL!	1	2	1	3	5	4	1	2	1	2		1	7	1	4	1	1	2	1	3	3	2	2	3	1	1	4	5	1	1	5	1	2	5	2	1	1	3
2021-07-18 19:04:12	2021-07-18 19:14:00	100	1	1	28	158	50	15	2	2	#NULL!	1	2	1	3	5	5	2	2	1	2		2	#NULL!	0	3	1	1	2	2	2	3	2	2	2	1	1	2	2	2	1	1	3	2	3	1	1	1	2
2021-07-18 19:14:10	2021-07-18 19:31:41	100	1	1	26	164	59	14	2	2	#NULL!	4	2	1	3	5	#NULL!	2	2	8	2		3	0	0	5	3	3	4	4	5	5	4	3	4	1	1	4	5	3	5	3	1	3	5	3	2	2	3
2021-07-18 19:29:26	2021-07-18 19:37:10	100	1	1	40	163	73	16	2	2	#NULL!	1	2	1	4	5	#NULL!	2	2	7	2	stenosis of the windpipe up to one year of age	2	#NULL!	1	4	2	2	5	4	4	5	3	2	4	1	4	3	4	1	1	2	4	1	4	1	1	1	1
2021-07-18 19:15:34	2021-07-18 19:44:31	100	1	1	24	165	54	16	2	2	#NULL!	1	2	1	4	5	#NULL!	2	2	7	2		3	#NULL!	1	3	1	2	2	2	3	1	3	1	3	1	1	3	4	3	4	5	4	4	3	3	3	2	1
2021-07-18 19:40:47	2021-07-18 19:49:27	100	1	1	26	164	83	16	2	2	#NULL!	1	3	1	4	5	#NULL!	1	1	5	1	Asperger's depression	2	30	0	1	1	4	2	4	3	3	2	3	2	1	5	3	4	1	1	5	1	5	2	2	2	1	1
2021-07-18 19:43:40	2021-07-18 19:53:24	100	1	1	46	172	86	20	2	2	#NULL!	1	1	1	1	5	1	2	1	8	2		3	#NULL!	0	3	1	3	3	3	3	4	2	5	3	1	1	5	3	3	1	4	1	4	5	1	1	1	3
2021-07-18 19:53:08	2021-07-18 20:02:53	100	1	1	23	171	66	12	2	2	#NULL!	1	2	1	3	5	#NULL!	1	3	6	1	CP	1	75	1	5	2	4	4	4	4	4	3	4	4	2	2	5	5	4	4	4	5	5	5	4	3	3	3
2021-07-18 19:55:22	2021-07-18 20:05:02	100	1	1	22	168	72	#NULL!	2	2	#NULL!	1	2	1	4	5	#NULL!	2	2	8	2		3	#NULL!	0	3	1	1	2	2	3	1	3	1	4	1	1	5	2	2	1	5	5	5	5	3	2	3	2
2021-07-18 19:58:57	2021-07-18 20:11:25	100	1	1	25	160	53	16	2	2	#NULL!	1	2	1	4	5	5	2	3	1	2		3	#NULL!	1	5	1	4	3	5	5	5	3	5	5	3	1	5	4	3	5	5	5	5	5	3	4	1	2
2021-07-18 20:05:01	2021-07-18 20:15:49	100	1	1	56	170	100	15	2	2	#NULL!	1	1	1	1	5	5	2	1	8	2		4	4	1	5	1	4	5	5	5	3	3	4	4	3	3	3	5	4	4	5	5	5	5	4	1	1	5
2021-07-18 20:12:13	2021-07-18 20:24:43	100	1	1	20	150	75	12	2	2	#NULL!	1	2	5	3	5	4	2	1	9	2		3	#NULL!	1	5	3	3	5	5	5	2	4	4	3	5	5	5	2	4	5	3	5	5	5	1	5	3	4
2021-07-18 20:06:08	2021-07-18 20:27:22	100	1	1	45	164	58	17	2	1	1990	4	2	1	1	5	5	2	1	8	2		3	#NULL!	1	4	1	1	4	1	3	1	1	1	2	2	2	1	5	1	1	1	1	3	5	2	2	1	1
2021-07-18 19:49:15	2021-07-18 20:31:12	100	1	1	24	170	60	14	2	2	#NULL!	1	2	1	4	5	#NULL!	2	2	8	2		3	#NULL!	1	4	1	3	3	3	2	3	3	3	3	1	1	4	4	1	1	2	1	4	5	2	1	1	1
2021-07-18 20:36:34	2021-07-18 20:50:59	100	1	1	23	148	42	15	2	2	#NULL!	1	2	1	3	5	2	2	1	8	1	diabetes type 1	4	65	1	4	1	5	4	4	3	5	3	5	5	2	3	3	5	4	5	2	3	5	5	5	#NULL!	1	4
2021-07-18 20:50:38	2021-07-18 21:03:09	100	1	1	26	162	50	19	2	2	#NULL!	1	5	5	3	5	4	3	1	9	2		3	#NULL!	1	5	2	2	3	5	5	5	5	2	5	3	5	5	4	4	5	5	5	5	5	3	4	4	5
2021-07-18 20:56:08	2021-07-18 21:05:16	100	1	1	28	163	59	17	2	2	#NULL!	1	2	1	1	5	5	2	2	8	2		3	#NULL!	0	4	1	3	3	4	5	5	3	3	5	2	4	5	4	3	5	5	5	4	5	3	1	2	3
2021-07-18 20:58:50	2021-07-18 21:08:28	100	1	1	27	164	52	14	2	2	#NULL!	1	2	1	3	5	5	2	1	8	2		3	#NULL!	1	4	1	1	5	1	3	1	3	1	4	1	1	3	4	5	1	5	1	5	5	4	4	5	3
2021-07-18 21:09:24	2021-07-18 21:19:04	100	1	1	28	161	68	17	2	2	1948	1	2	1	1	5	#NULL!	2	2	8	2		#NULL!	#NULL!	0	4	1	3	2	3	2	4	1	4	3	2	2	4	5	4	4	1	1	2	4	1	1	1	1
2021-07-18 21:22:00	2021-07-18 21:36:19	100	1	1	29	158	98	12	2	2	1948	1	3	1	1	5	4	2	2	8	2		3	0	0	5	1	1	2	1	2	2	2	1	3	1	1	5	5	5	5	5	2	5	5	2	1	2	4
2021-07-18 21:34:26	2021-07-18 21:49:12	100	1	1	40	172	80	22	2	2	#NULL!	1	2	1	1	5	#NULL!	2	2	8	2		#NULL!	#NULL!	1	5	1	4	4	4	5	5	4	3	5	3	5	5	2	1	1	2	2	3	5	4	4	2	2
2021-07-18 21:41:11	2021-07-18 22:01:55	100	1	1	32	172	54	14	2	2	#NULL!	1	2	1	1	5	5	2	3	2	2		1	70	0	3	1	3	3	5	3	1	3	3	3	3	3	3	4	5	2	4	3	3	5	2	1	1	2
2021-07-18 21:51:59	2021-07-18 22:05:09	100	1	1	40	168	90	24	2	2	#NULL!	2	2	5	3	5	#NULL!	2	2	9	1	fibromyalgia	4	62	1	4	1	2	4	2	4	3	3	2	3	2	3	2	4	2	2	5	3	5	4	3	2	2	2
2021-07-18 22:07:10	2021-07-18 22:30:32	100	1	1	24	164	50	#NULL!	2	2	#NULL!	1	2	1	4	5	4	2	1	1	2		1	20	1	4	1	2	3	2	4	1	4	3	5	2	3	5	5	5	5	5	5	5	5	5	5	2	3
2021-07-18 22:31:01	2021-07-18 22:43:28	100	1	1	23	167	53	14	2	2	#NULL!	1	2	1	4	5	#NULL!	2	1	7	2		2	#NULL!	1	5	1	4	3	3	5	3	4	2	4	1	1	3	5	4	3	3	5	4	5	4	2	2	4
2021-07-18 22:36:28	2021-07-18 22:47:09	100	1	1	21	157	59	13	2	2	#NULL!	1	2	1	3	5	5	2	2	8	2		3	#NULL!	1	5	2	3	3	4	5	3	3	2	4	2	5	5	3	3	3	4	2	4	5	4	4	4	3
2021-07-18 22:26:15	2021-07-18 22:48:05	100	1	1	30	158	130	19	2	2	#NULL!	1	2	1	3	5	4	2	2	7	2		2	#NULL!	0	5	3	5	4	5	5	4	4	5	4	3	5	5	5	3	5	4	1	4	5	2	3	1	3
2021-07-18 22:37:49	2021-07-18 22:49:16	100	1	1	24	164	59	14	2	2	#NULL!	1	2	1	4	5	#NULL!	3	1	9	2		3	#NULL!	1	4	2	2	4	2	4	1	2	2	4	1	2	5	5	4	5	5	5	5	5	4	2	2	4
2021-07-18 22:37:45	2021-07-18 22:52:01	100	1	1	40	157	41	16	2	2	#NULL!	1	2	5	1	5	5	2	1	8	2		3	#NULL!	1	3	1	1	2	3	3	2	3	1	2	1	2	3	3	1	1	3	1	3	2	2	3	4	1
2021-07-18 22:38:13	2021-07-18 22:54:08	100	1	1	24	153	42	14	2	2	#NULL!	1	2	1	3	5	5	2	1	4	2		1	65	0	4	1	5	3	4	4	5	3	3	3	4	2	4	5	3	3	3	1	2	5	4	2	3	2
2021-07-18 22:51:44	2021-07-18 23:05:00	100	1	1	46	0	0	25	2	2	#NULL!	1	2	1	1	5	2	2	2	8	1	lactose sensitivity	4	47	0	5	1	3	5	2	4	5	2	3	2	1	5	2	5	1	5	1	1	5	5	4	4	1	5
2021-07-18 22:52:26	2021-07-18 23:09:59	100	1	1	30	155	68	#NULL!	2	2	#NULL!	1	2	1	1	5	4	3	1	4	1	asthma	1	25	1	5	1	1	5	4	5	1	5	1	5	3	4	4	4	1	1	1	1	2	1	1	2	1	1
2021-07-18 23:01:47	2021-07-18 23:14:14	100	1	1	23	175	101	12	2	2	#NULL!	1	2	1	4	5	5	2	2	1	1	ADHD	1	20	0	3	1	3	2	2	2	4	2	1	3	1	1	1	4	1	3	2	2	2	5	3	1	3	1
2021-07-18 22:20:34	2021-07-19 00:02:16	100	1	1	44	154	47	23	2	2	#NULL!	1	2	1	1	5	4	2	1	8	2		3	#NULL!	1	5	1	1	4	3	2	2	3	1	3	2	1	4	5	4	5	4	4	5	5	4	5	3	4
2021-07-18 23:56:13	2021-07-19 00:08:31	100	1	1	40	174	68	20	2	2	1990	4	2	1	1	5	#NULL!	2	2	1	2		2	#NULL!	0	1	1	1	3	2	2	2	2	3	3	2	1	1	5	1	3	4	1	5	3	2	1	1	1
2021-07-19 00:06:46	2021-07-19 00:16:31	100	1	1	21	158	61	15	2	2	#NULL!	1	1	1	3	5	4	2	2	9	2		2	#NULL!	1	5	2	4	5	5	4	4	4	2	4	2	3	5	4	4	5	5	5	5	5	4	4	3	3
2021-07-19 00:23:28	2021-07-19 00:31:15	100	1	1	23	153	47	12	2	2	#NULL!	1	2	1	3	5	#NULL!	2	2	8	2		3	#NULL!	0	5	1	3	1	4	1	4	3	1	3	1	1	4	5	5	5	3	4	4	4	2	1	1	1
2021-07-19 00:22:05	2021-07-19 00:32:13	100	1	1	29	173	62	16	2	2	#NULL!	1	2	1	1	5	4	2	2	7	2		1	60	0	5	2	3	4	4	2	3	4	2	4	2	2	5	5	4	5	2	1	3	5	3	1	1	3
2021-07-19 00:28:42	2021-07-19 00:43:47	100	1	1	26	164	61	15	2	2	#NULL!	1	2	1	4	5	#NULL!	2	2	8	2		3	#NULL!	1	4	2	4	5	4	5	5	5	4	3	1	1	5	4	4	3	4	2	5	5	4	3	1	4
2021-07-19 00:36:52	2021-07-19 00:46:00	100	1	1	23	168	59	14	2	2	#NULL!	1	2	1	3	5	4	2	2	7	1	Hashimoto disease	1	20	1	4	1	3	2	3	3	4	3	4	3	2	3	5	5	3	5	4	2	4	5	2	4	3	5
2021-07-19 00:46:48	2021-07-19 01:01:48	100	1	1	38	165	89	19	2	2	#NULL!	1	3	1	1	5	4	2	2	8	1	sinositis	1	40	1	4	2	4	3	2	4	3	3	1	3	1	1	5	3	1	1	5	1	5	1	3	4	1	1
2021-07-19 01:12:52	2021-07-19 01:21:31	100	1	1	27	173	92	15	2	1	1997	4	2	3	3	5	5	2	2	8	2		4	#NULL!	1	5	1	3	5	5	4	3	5	2	5	2	2	3	5	5	4	3	1	5	5	2	2	4	2
2021-07-19 01:45:23	2021-07-19 01:53:45	100	1	1	27	168	93	19	2	2	#NULL!	1	2	1	3	5	5	2	2	5	1	dysgraphia and ADHD	1	81	1	4	2	5	4	3	4	5	3	5	4	2	2	5	4	3	5	5	3	5	5	5	3	1	3
2021-07-19 01:39:55	2021-07-19 02:01:56	100	1	1	41	162	68	25	2	1	1989	4	2	1	1	5	#NULL!	2	2	4	2		2	#NULL!	1	4	1	1	2	3	3	3	3	3	3	2	2	2	5	1	3	3	2	2	5	2	1	1	1
2021-07-19 02:23:54	2021-07-19 02:31:44	100	1	1	30	155	72	17	2	2	#NULL!	1	2	1	1	5	4	2	2	8	1		3	#NULL!	1	5	1	1	3	3	3	1	2	1	5	1	1	5	5	5	1	5	1	5	5	5	5	1	4
2021-07-19 02:25:46	2021-07-19 02:36:10	100	1	1	23	163	49	14	2	2	#NULL!	1	2	1	3	5	#NULL!	2	1	8	1	migraine with aura	4	50	1	5	1	3	3	4	4	5	2	3	3	2	3	5	5	4	3	4	5	5	5	2	2	2	3
2021-07-19 02:59:17	2021-07-19 03:11:51	100	1	1	22	159	60	13	2	2	#NULL!	1	2	1	4	5	4	2	1	1	2		4	61	1	5	1	3	3	3	4	5	3	2	3	1	2	4	5	3	3	5	5	5	5	3	3	2	4
2021-07-19 03:04:03	2021-07-19 03:23:18	100	1	1	29	165	55	16	2	2	#NULL!	1	2	1	4	5	5	1	1	7	2	hypotonia	1	60	1	1	1	1	3	3	5	1	4	1	3	1	1	3	5	4	4	4	4	4	5	2	1	1	3
2021-07-19 03:17:05	2021-07-19 03:31:50	100	1	1	28	150	53	12	2	2	#NULL!	1	2	1	3	5	4	3	2	9	2		3	0	1	3	1	3	3	2	4	5	3	2	4	1	1	5	2	1	4	5	5	5	5	1	3	1	4
2021-07-19 04:34:47	2021-07-19 04:47:12	100	1	1	20	0	0	12	2	2	#NULL!	1	1	1	3	5	#NULL!	2	2	8	2		3	#NULL!	#NULL!	4	1	2	3	3	3	4	2	3	3	1	2	4	5	3	1	3	1	5	5	4	1	3	5
2021-07-19 06:13:54	2021-07-19 06:24:18	100	1	1	32	164	81	22	2	2	#NULL!	1	3	1	1	5	5	2	2	3	2		2	#NULL!	0	3	1	1	2	1	3	2	2	1	3	1	1	3	4	1	1	1	1	1	3	1	1	2	2
2021-07-19 07:33:44	2021-07-19 07:47:30	100	1	1	24	168	58	16	2	2	#NULL!	1	2	6	3	5	4	2	1	2	2		2	#NULL!	1	3	2	3	3	3	2	4	3	3	3	5	4	5	4	3	4	4	4	5	5	3	3	4	4
2021-07-19 08:09:00	2021-07-19 08:32:50	100	1	1	43	161	50	15	2	2	1948	1	2	1	1	5	5	2	1	8	2		3	#NULL!	1	3	1	3	2	2	3	#NULL!	2	#NULL!	2	#NULL!	2	2	5	3	3	4	2	5	2	3	2	1	2
2021-07-19 09:42:55	2021-07-19 09:51:01	100	1	1	29	171	96	17	2	2	#NULL!	1	2	1	1	5	4	2	2	9	2		4	#NULL!	1	4	1	1	3	3	4	3	4	2	4	2	3	4	4	2	5	2	5	5	5	3	3	1	4
2021-07-19 09:49:15	2021-07-19 10:02:48	100	1	1	24	163	56	14	2	2	#NULL!	1	2	1	4	5	4	2	2	8	2		4	34	0	5	3	5	3	4	4	3	3	2	4	2	4	2	5	2	3	1	1	3	5	3	1	2	5
2021-07-19 09:25:39	2021-07-19 10:18:47	100	1	1	36	160	64	17	2	2	#NULL!	1	2	1	1	5	5	2	1	8	2		3	0	1	#NULL!	1	2	3	3	4	2	3	2	4	2	2	2	4	1	4	2	1	3	2	2	3	2	3
2021-07-19 10:24:06	2021-07-19 10:36:47	100	1	1	23	163	118	15	2	2	#NULL!	1	2	1	3	5	#NULL!	2	2	8	1	Free runing sleep syndrom	1	20	0	5	1	5	3	4	5	3	3	1	2	1	1	5	5	4	5	2	1	2	4	1	1	1	1
2021-07-19 10:30:36	2021-07-19 10:47:28	100	1	1	25	165	70	15	2	2	1997	1	2	5	4	5	5	2	2	8	2		3	#NULL!	1	4	2	2	3	3	3	4	3	3	3	1	1	1	4	3	5	4	1	4	4	3	2	3	1
2021-07-19 10:38:31	2021-07-19 11:04:18	100	1	1	29	160	64	16	2	2	1948	1	2	1	4	5	5	2	2	8	2		3	#NULL!	1	4	1	1	2	3	2	1	2	1	3	1	3	5	4	4	1	2	3	3	5	3	2	1	1
2021-07-19 10:51:23	2021-07-19 11:07:23	100	1	1	23	156	50	15	2	2	#NULL!	1	2	1	3	5	#NULL!	2	2	8	2		3	#NULL!	0	3	1	2	4	3	4	4	3	1	3	1	1	3	5	3	4	3	2	1	5	1	1	1	1
2021-07-19 11:23:06	2021-07-19 12:11:27	100	1	1	65	162	85	15	2	2	#NULL!	1	2	1	1	5	4	2	2	7	2		2	#NULL!	0	5	1	2	2	2	1	5	2	2	1	1	5	3	5	1	5	1	1	4	5	1	1	1	3
2021-07-19 12:01:45	2021-07-19 12:15:34	100	1	1	23	163	80	12	2	2	#NULL!	1	2	1	4	5	5	2	2	3	2		4	39	0	4	2	4	2	2	4	5	3	3	3	1	1	4	4	2	2	3	3	4	5	3	1	2	3
2021-07-19 12:25:36	2021-07-19 12:36:22	100	1	1	24	158	42	14	2	2	#NULL!	1	2	1	4	5	#NULL!	3	1	5	1	depression and suicidality	1	60	1	4	3	3	4	3	3	2	5	5	5	2	3	2	3	2	1	4	2	5	4	4	4	3	4
2021-07-19 12:21:56	2021-07-19 12:39:48	100	1	1	22	164	60	#NULL!	2	2	#NULL!	1	2	1	4	5	5	2	2	8	1	migraines	4	30	1	4	1	1	3	3	4	4	3	2	4	1	1	5	5	3	2	1	5	5	3	4	3	2	3
2021-07-19 02:40:23	2021-07-19 02:59:24	98	0	1	25	160	64	14	2	2	#NULL!	1	2	1	3	5	5	2	1	7	1		1	65	1	5	5	4	4	4	3	4	3	4	4	3	3	5	5	5	5	#NULL!	5	5	5	4	4	3	3
2021-07-19 12:27:28	2021-07-19 12:50:16	98	0	1	25	155	175	#NULL!	2	2	#NULL!	1	2	1	3	5	5	2	2	8	2		3	#NULL!	1	4	1	2	4	4	4	4	3	4	4	3	3	4	5	4	3	4	4	4	2	4	4	2	3
2021-07-11 17:45:40	2021-07-11 19:11:15	100	1	1	27	190	103	16	1	2	#NULL!	1	2	1	4	6	2	2	2	7	1	sarcoidosis	1	10	1	3	1	1	1	1	3	1	1	3	2	1	1	3	5	1	2	1	5	1	5	1	3	2	2
2021-07-14 14:18:22	2021-07-14 14:39:24	100	1	1	24	173	61	20	1	2	1997	1	2	5	3	6	2	2	2	7	1	early beat	1	#NULL!	0	4	1	1	4	3	4	4	2	1	4	3	3	1	1	1	1	1	1	1	4	2	2	2	1
2021-07-18 17:46:24	2021-07-18 17:57:24	100	1	1	29	185	107	17	1	2	#NULL!	1	3	1	3	6	4	2	2	8	2		3	#NULL!	1	4	1	3	4	5	5	5	3	2	3	1	1	3	2	4	5	5	1	5	5	1	3	2	3
2021-07-18 21:12:08	2021-07-18 21:24:41	100	1	1	29	174	80	18	1	2	#NULL!	1	2	1	4	6	4	2	1	5	1	sensory regulation disorder	1	70	1	5	1	1	4	4	5	3	4	1	5	1	2	4	5	1	1	4	5	5	4	5	5	1	5
2021-07-19 00:01:02	2021-07-19 00:18:57	100	1	1	32	186	88	16	1	2	#NULL!	1	2	1	1	6	4	1	2	4	1	TGA and absence of the right ventricle of the heart	2	0	1	5	1	1	2	4	4	4	3	2	5	1	1	4	4	2	5	4	4	5	5	5	4	4	2
2021-07-19 01:37:59	2021-07-19 01:51:06	100	1	1	28	175	73	18	1	2	#NULL!	1	2	5	3	6	2	2	2	9	1	lactose intolerance	1	10	0	5	4	5	4	4	1	5	4	4	4	2	4	4	3	3	2	4	2	4	5	2	3	1	1
2021-07-11 18:03:35	2021-07-11 18:29:53	100	1	1	34	167	56	17	2	2	#NULL!	1	3	1	1	6	2	2	2	8	1	chondrosarcoma	3	#NULL!	1	5	1	3	3	3	5	3	2	3	2	1	1	1	5	4	5	4	1	5	5	2	1	2	2
2021-07-11 18:31:18	2021-07-11 20:28:09	100	1	1	24	163	53	16	2	2	1948	1	2	1	1	6	4	2	1	8	2		3	0	1	5	2	3	2	4	4	3	2	1	4	3	2	3	5	5	5	3	1	5	5	4	4	3	1
2021-07-11 20:11:04	2021-07-11 20:34:31	100	1	1	41	167	64	16	2	1	1997	4	2	1	1	6	2	2	2	8	2		4	31	0	2	2	2	2	2	3	2	2	2	2	2	3	1	5	3	2	1	1	3	5	1	1	2	2
2021-07-11 20:45:12	2021-07-11 21:04:30	100	1	1	35	164	67	16	2	2	#NULL!	4	2	1	1	6	5	2	2	8	2		3	#NULL!	0	3	1	1	1	2	1	3	2	2	3	1	1	1	5	2	1	1	1	1	4	2	1	1	3
2021-07-11 20:57:39	2021-07-11 21:20:09	100	1	1	28	170	57	15	2	2	#NULL!	1	5	1	1	6	2	2	1	1	1	ADHD	1	25	1	2	2	3	3	4	4	4	2	4	2	2	3	5	5	4	3	2	2	4	4	3	1	2	3
2021-07-11 20:42:01	2021-07-11 21:28:23	100	1	1	41	163	49	23	2	1	1989	4	2	5	2	6	4	2	2	7	1	epilepsy	2	0	1	4	1	3	3	2	5	2	2	3	2	2	3	2	5	1	5	1	1	3	2	4	1	1	3
2021-07-12 00:33:47	2021-07-12 00:42:42	100	1	1	27	162	82	16	2	2	#NULL!	1	2	1	1	6	2	2	2	8	2		3	#NULL!	0	2	2	3	2	2	3	3	3	3	3	1	3	1	5	2	3	3	1	5	5	2	2	2	2
2021-07-12 00:39:58	2021-07-12 00:49:49	100	1	1	26	160	50	15	2	2	#NULL!	1	2	1	4	6	2	2	2	8	1	IBS - they could's find the diagnosis so they call it IBS	1	20	1	4	1	2	2	3	3	4	3	3	3	1	1	3	4	1	4	2	1	4	5	1	2	2	2
2021-07-12 11:52:18	2021-07-12 12:03:24	100	1	1	26	168	55	16	2	2	#NULL!	1	2	1	3	6	2	2	2	8	2		3	0	0	4	1	1	3	3	3	2	3	1	3	1	1	5	4	4	4	2	1	2	3	3	2	2	2
2021-07-12 12:05:26	2021-07-12 12:19:06	100	1	1	30	164	63	12	2	2	#NULL!	1	2	1	4	6	2	2	2	1	2		1	31	1	5	3	4	3	5	5	4	3	4	4	3	2	5	5	5	5	5	5	5	5	4	3	1	3
2021-07-12 14:09:30	2021-07-12 14:19:25	100	1	1	26	161	90	15	2	2	#NULL!	1	2	1	3	6	2	2	2	8	2		#NULL!	#NULL!	1	5	1	3	3	4	3	3	3	4	5	2	2	5	4	2	5	5	5	3	5	4	4	1	2
2021-07-12 15:16:11	2021-07-12 15:39:34	100	1	1	37	161	63	17	2	2	#NULL!	1	2	1	3	6	2	2	2	8	2	only intolerance of liquid milk	4	10	0	3	1	2	2	2	3	3	2	3	2	1	2	2	4	1	1	1	1	3	5	3	1	2	1
2021-07-12 17:46:46	2021-07-12 18:05:40	100	1	1	27	158	52	17	2	2	2018	1	1	1	1	6	1	2	2	1	2	acid stomach, lactose sensitivity and other conditions	4	35	0	2	1	2	2	3	2	3	2	3	3	2	1	1	3	2	3	2	2	2	2	1	1	1	2
2021-07-12 18:38:06	2021-07-12 18:49:19	100	1	1	24	155	45	16	2	2	#NULL!	1	2	1	4	6	2	2	2	4	2		2	#NULL!	1	4	2	2	2	3	2	3	3	2	3	1	2	5	5	3	5	4	5	5	4	3	1	2	2
2021-07-12 21:22:39	2021-07-12 21:36:22	100	1	1	26	151	47	12	2	2	#NULL!	1	2	1	3	6	4	1	2	1	2		1	52	1	5	1	1	4	4	5	4	3	2	3	1	1	5	5	5	1	4	3	5	5	4	3	1	5
2021-07-12 21:36:10	2021-07-12 21:50:03	100	1	1	35	150	50	19	2	2	#NULL!	5	2	1	1	6	2	2	2	8	2		3	#NULL!	1	4	1	2	2	2	3	2	2	2	3	1	1	5	3	2	2	5	5	5	5	2	3	2	3
2021-07-12 18:31:44	2021-07-12 21:56:17	100	1	1	70	160	57	20	2	2	#NULL!	6	2	1	2	6	#NULL!	2	2	8	2		4	15	0	#NULL!	1	1	4	2	2	2	2	3	2	1	1	1	5	#NULL!	1	2	4	1	2	2	1	2	1
2021-07-13 10:34:48	2021-07-13 10:53:44	100	1	1	30	156	53	12	2	2	#NULL!	1	2	1	3	6	2	2	2	1	1	asthma	1	50	1	3	1	1	3	3	2	2	2	2	2	1	3	4	5	2	1	3	3	4	4	2	2	3	4
2021-07-13 18:44:43	2021-07-13 18:54:02	100	1	1	25	160	58	15	2	2	#NULL!	1	2	1	4	6	2	2	2	8	2		3	#NULL!	0	4	1	2	3	3	3	3	3	2	3	1	1	4	5	1	5	1	1	5	5	4	2	4	2
2021-07-13 19:01:12	2021-07-13 19:09:11	100	1	1	22	152	66	13	2	2	#NULL!	1	2	1	3	6	2	2	2	8	2		3	#NULL!	1	4	3	2	4	5	5	5	5	3	5	1	3	4	5	5	5	5	4	5	5	4	5	4	4
2021-07-16 15:03:03	2021-07-16 15:42:41	100	1	1	23	164	65	12	2	1	2000	4	2	6	4	6	4	1	1	5	1	asthma	1	10	1	5	3	5	5	3	4	5	4	5	4	2	2	4	5	3	4	5	3	5	5	4	3	2	3
2021-07-18 16:24:31	2021-07-18 16:32:31	100	1	1	21	161	96	13	2	2	#NULL!	1	2	1	4	6	2	2	2	4	1	asthma	2	#NULL!	1	4	2	5	4	3	2	5	3	4	4	4	2	5	4	3	3	2	5	4	4	2	2	2	2
2021-07-18 16:28:33	2021-07-18 16:36:05	100	1	1	26	167	59	15	2	2	#NULL!	1	2	1	4	6	4	2	1	8	2		3	#NULL!	1	4	1	2	3	2	2	2	2	1	3	1	1	4	4	3	4	5	3	5	5	2	3	2	1
2021-07-18 16:27:52	2021-07-18 16:40:40	100	1	1	24	165	93	15	2	2	#NULL!	1	2	1	3	6	2	2	2	8	1	lactose sensitivity	4	20	1	4	1	1	3	3	3	3	3	1	3	2	1	4	5	2	2	2	5	2	5	4	5	3	3
2021-07-18 16:47:47	2021-07-18 16:58:48	100	1	1	23	172	61	13	2	2	#NULL!	1	2	1	4	6	2	2	1	8	1	lactose sensitivity	4	67	1	5	1	2	4	3	4	1	5	1	5	1	2	5	1	1	4	5	5	5	2	5	4	2	3
2021-07-18 17:27:24	2021-07-18 17:35:58	100	1	1	28	160	64	15	2	1	2002	1	3	1	3	6	2	2	2	9	2		1	50	1	5	2	2	2	2	4	3	3	3	4	1	2	1	2	1	1	3	4	5	5	3	3	2	2
2021-07-18 16:32:06	2021-07-18 18:32:38	100	1	1	27	168	58	16	2	2	#NULL!	1	2	1	4	6	4	2	2	7	1	hypothyrodism	4	#NULL!	0	5	1	1	2	2	3	2	2	2	3	1	3	5	5	2	1	1	1	2	5	3	2	2	2
2021-07-18 19:33:05	2021-07-18 19:42:52	100	1	1	24	165	54	14	2	2	#NULL!	1	2	1	4	6	2	2	2	9	2		3	#NULL!	1	5	2	1	3	3	4	3	4	2	5	3	2	4	3	1	2	4	1	2	5	2	3	2	1
2021-07-18 19:36:19	2021-07-18 19:48:10	100	1	1	31	164	60	19	2	2	1948	1	2	1	4	6	2	1	1	7	1	Being underweight I could not nurse properly as a baby	2	#NULL!	0	4	1	2	3	3	4	4	3	2	3	2	3	1	4	1	1	2	2	1	5	1	1	1	1
2021-07-18 23:00:19	2021-07-18 23:12:32	100	1	1	29	157	47	14	2	2	#NULL!	1	2	1	4	6	4	2	2	8	2		4	20	1	4	1	2	4	1	3	1	3	1	3	1	1	1	2	2	5	4	1	5	5	2	3	3	3
2021-07-18 23:22:20	2021-07-18 23:34:24	100	1	1	25	164	66	12	2	2	#NULL!	1	2	1	4	6	4	2	1	7	1	Famillial Meditaranian Fever	1	20	1	5	1	5	4	3	5	3	5	2	3	2	1	5	3	1	5	3	1	5	5	2	4	3	4
2021-07-19 01:41:01	2021-07-19 01:54:56	100	1	1	26	168	74	15	2	2	#NULL!	1	2	1	4	6	4	2	1	1	1	ADHD	1	80	1	4	3	2	2	3	1	2	3	2	3	1	1	4	5	2	2	4	4	4	4	4	3	2	3
2021-07-19 11:20:24	2021-07-19 11:31:50	100	1	1	25	175	57	12	2	2	#NULL!	1	2	1	3	6	3	2	3	1	1	ADD and asthma. Fyi both are lifelong and are not childhood disorders	1	70	1	2	1	1	2	2	4	4	2	1	2	1	1	1	5	3	5	1	1	1	1	3	2	3	1
2021-07-19 12:47:58	2021-07-19 13:03:18	100	1	1	25	166	65	12	2	2	1948	4	2	5	3	6	2	2	2	8	2		3	#NULL!	0	3	1	3	2	2	3	3	2	2	1	1	2	2	1	1	4	3	1	2	2	1	2	3	2
2021-07-11 19:06:41	2021-07-11 19:18:08	100	1	1	21	179	82	#NULL!	1	2	#NULL!	1	2	1	3	7	4	2	2	8	2		3	#NULL!	1	4	1	3	1	2	2	5	2	3	5	4	4	2	3	2	4	5	2	5	5	2	4	2	2
2021-07-12 14:38:25	2021-07-12 14:50:03	100	1	1	30	162	50	16	1	2	#NULL!	1	2	1	1	7	3	2	2	8	2		#NULL!	#NULL!	0	5	1	1	3	3	3	1	3	1	3	1	1	1	4	2	3	1	1	2	4	1	1	1	1
2021-07-12 21:29:57	2021-07-12 21:47:44	100	1	1	27	168	65	12	1	2	#NULL!	1	2	1	4	7	4	2	2	4	1	asthma and allergic runny nose	1	30	1	5	1	1	4	5	5	5	4	3	5	3	3	5	3	4	5	5	5	5	5	3	5	4	2
2021-07-13 02:44:30	2021-07-13 03:02:04	100	1	1	25	174	67	13	1	2	#NULL!	1	2	1	4	7	4	3	1	9	2		3	#NULL!	1	5	2	4	4	4	3	3	3	3	4	5	5	5	5	3	3	5	5	5	5	4	4	2	2
2021-07-18 01:27:42	2021-07-18 01:47:42	100	1	1	34	177	75	23	1	1	1990	1	2	1	1	7	4	1	1	5	2		2	#NULL!	1	3	1	1	2	2	3	1	2	1	2	1	1	3	3	1	3	2	2	3	5	2	3	1	2
2021-07-18 16:16:09	2021-07-18 16:32:51	100	1	1	30	178	110	14	1	2	#NULL!	1	2	5	4	7	4	2	2	9	2		3	#NULL!	1	5	2	2	4	5	4	3	4	3	4	4	4	5	5	4	2	3	5	5	5	3	5	2	3
2021-07-18 18:21:29	2021-07-18 18:42:12	100	1	1	27	170	70	#NULL!	1	2	#NULL!	1	2	1	4	7	4	2	2	8	2		3	#NULL!	1	4	1	2	3	3	5	2	4	2	5	2	1	1	4	5	2	4	2	5	5	3	4	1	3
2021-07-18 18:56:37	2021-07-18 19:13:04	100	1	1	28	180	68	17	1	2	#NULL!	1	2	1	3	7	4	2	1	8	2		3	#NULL!	1	5	2	1	3	2	4	1	3	2	3	1	1	4	4	1	1	1	5	5	5	3	1	1	1
2021-07-18 20:20:19	2021-07-18 20:28:51	100	1	1	24	178	67	12	1	2	#NULL!	1	2	1	4	7	1	2	2	8	2		3	#NULL!	1	4	1	3	2	4	4	2	3	5	3	2	2	5	4	2	3	2	5	5	5	3	4	2	2
2021-07-18 22:53:11	2021-07-18 23:17:55	100	1	1	27	168	48	16	1	2	#NULL!	1	2	1	4	7	4	2	2	8	2		3	#NULL!	1	4	1	1	3	3	3	1	3	1	4	2	3	4	4	2	3	4	5	5	5	4	5	4	3
2021-07-19 00:21:28	2021-07-19 00:35:55	100	1	1	25	178	72	15	1	2	#NULL!	1	2	1	4	7	4	2	1	8	2		3	#NULL!	1	5	3	2	3	2	4	3	4	2	4	3	2	5	4	4	5	5	5	5	5	2	5	3	4
2021-07-19 01:08:34	2021-07-19 01:20:06	100	1	1	26	176	65	16	1	2	#NULL!	1	5	1	3	7	2	2	2	2	1	Krohn's disease	3	#NULL!	1	3	1	4	2	5	3	5	3	4	4	3	1	2	3	4	3	2	#NULL!	5	4	4	5	5	2
2021-07-19 02:08:53	2021-07-19 02:23:54	100	1	1	23	170	71	12	1	2	#NULL!	1	2	1	4	7	2	2	2	8	1	celiac,	1	29	1	5	1	1	4	2	4	1	3	1	4	1	1	3	4	1	2	1	1	5	5	2	4	2	4
2021-07-19 03:09:41	2021-07-19 03:21:03	100	1	1	37	176	71	19	1	2	#NULL!	1	2	1	1	7	4	2	1	9	1	hypot-thyrodism	4	#NULL!	1	5	1	2	5	3	4	4	3	1	3	2	1	4	3	2	5	5	5	5	5	5	5	3	4
2021-07-11 17:26:29	2021-07-11 17:48:10	100	1	1	29	169	82	16	2	2	#NULL!	1	2	1	1	7	2	2	2	8	2		3	0	0	2	1	2	2	1	3	4	3	4	2	1	1	2	4	2	2	4	1	4	1	2	1	1	3
2021-07-11 18:31:41	2021-07-11 18:41:06	100	1	1	24	177	65	15	2	2	#NULL!	1	2	1	3	7	3	2	3	8	1	migraines and anemia	4	88	1	4	3	3	3	4	4	3	3	5	4	2	1	5	3	3	3	4	5	5	4	4	3	1	3
2021-07-11 18:29:07	2021-07-11 18:47:33	100	1	1	23	162	66	18	2	2	1948	1	2	1	2	7	2	3	1	8	#NULL!		4	0	1	5	1	1	2	2	2	1	2	1	3	1	1	5	5	3	5	1	3	3	5	3	3	1	2
2021-07-11 19:08:50	2021-07-11 19:36:06	100	1	1	27	163	70	15	2	1	2012	5	3	1	4	7	4	2	1	2	1	gastrisis	1	50	0	4	2	1	2	3	3	3	2	1	3	3	2	2	4	1	4	2	3	3	4	2	3	2	2
2021-07-11 21:29:00	2021-07-11 21:44:10	100	1	1	32	160	49	15	2	2	#NULL!	1	2	1	1	7	4	2	2	3	2		3	#NULL!	1	5	1	3	4	4	4	4	4	3	4	3	2	5	3	4	3	3	5	4	5	3	4	3	3
2021-07-11 19:48:38	2021-07-11 22:05:06	100	1	1	34	168	66	17	2	2	#NULL!	1	3	1	1	7	2	2	2	8	1	hyper-thyrodism	4	80	0	2	1	1	1	1	1	1	1	3	2	1	1	4	5	5	1	1	1	2	1	1	1	1	1
2021-07-11 23:04:10	2021-07-11 23:27:37	100	1	1	42	170	56	18	2	1	2004	6	3	1	1	7	3	2	2	8	2		3	#NULL!	1	4	1	1	1	2	3	2	2	1	2	1	1	1	4	3	2	1	1	2	3	2	3	1	2
2021-07-12 07:34:21	2021-07-12 07:52:11	100	1	1	36	150	61	15	2	2	#NULL!	1	2	1	3	7	2	2	2	8	2		3	#NULL!	0	3	1	2	3	2	4	1	3	4	3	2	2	1	4	3	1	1	1	2	2	2	1	3	1
2021-07-12 10:59:51	2021-07-12 14:08:59	100	1	1	31	155	51	16	2	2	#NULL!	1	2	1	1	7	4	2	1	8	2		3	#NULL!	1	4	1	3	4	2	4	2	3	2	4	2	3	5	3	3	4	5	2	5	4	3	5	3	3
2021-07-12 14:25:29	2021-07-12 14:36:52	100	1	1	24	158	60	12	2	1	2002	5	2	1	4	7	4	2	1	7	1	psoriasis	1	50	1	5	1	3	5	4	5	2	4	4	4	3	3	5	5	3	5	3	5	5	5	1	4	1	4
2021-07-12 15:13:02	2021-07-12 15:22:25	100	1	1	41	160	75	18	2	2	#NULL!	1	2	1	1	7	2	2	2	5	2		4	40	0	3	1	1	3	2	3	3	3	2	2	1	2	1	3	4	1	1	1	2	2	2	1	1	1
2021-07-12 15:14:25	2021-07-12 15:35:51	100	1	1	45	163	63	16	2	2	#NULL!	1	2	1	1	7	2	2	2	8	1	diabetes type 1 late onset	#NULL!	100	0	3	1	1	3	2	2	1	3	3	3	1	1	5	5	4	2	3	4	5	4	3	4	3	4
2021-07-12 15:57:15	2021-07-12 16:13:15	100	1	1	24	162	63	13	2	2	#NULL!	1	2	1	3	7	4	1	2	4	1	rheumatism	1	23	0	4	1	4	4	4	5	2	3	3	3	2	4	5	2	1	1	4	5	5	5	3	5	1	4
2021-07-12 17:39:05	2021-07-12 17:59:44	100	1	1	23	172	62	14	2	2	#NULL!	1	2	1	3	7	4	2	2	8	2		3	#NULL!	1	4	1	1	3	2	3	2	3	3	3	1	3	4	3	2	2	2	3	3	3	2	2	4	2
2021-07-12 17:41:40	2021-07-12 18:09:37	100	1	1	28	0	0	17	2	2	#NULL!	1	2	1	4	7	4	2	1	8	2		4	0	1	5	1	5	5	1	5	5	5	4	5	1	1	5	5	3	2	4	5	3	5	1	5	5	4
2021-07-12 18:07:18	2021-07-12 18:18:05	100	1	1	29	176	77	17	2	2	#NULL!	1	2	1	1	7	4	2	2	8	2		3	#NULL!	0	4	1	2	3	3	3	3	4	1	4	1	3	5	3	4	3	1	5	2	3	3	2	1	2
2021-07-12 17:28:30	2021-07-12 18:54:11	100	1	1	26	165	49	17	2	2	#NULL!	1	2	1	4	7	4	2	2	8	2		3	#NULL!	1	5	3	3	5	5	4	3	4	4	5	4	2	5	5	5	4	4	2	2	5	4	5	4	4
2021-07-12 18:50:25	2021-07-12 19:01:43	100	1	1	26	175	60	14	2	2	#NULL!	1	2	1	4	7	4	2	2	1	1	colitis	4	40	1	5	1	3	4	3	3	3	3	3	4	3	4	5	5	3	5	5	5	5	5	4	5	3	4
2021-07-13 02:33:56	2021-07-13 02:52:33	100	1	1	26	164	70	15	2	2	#NULL!	1	2	1	1	7	4	3	1	1	2		3	#NULL!	0	4	2	1	3	3	2	3	4	2	3	1	3	5	5	5	5	3	3	4	5	5	3	2	1
2021-07-13 11:58:34	2021-07-13 12:08:18	100	1	1	32	164	69	13	2	2	#NULL!	1	2	5	3	7	4	2	2	7	1	endometriosis and borderline personality disorder	4	75	1	5	2	1	5	5	5	5	4	2	4	1	4	5	5	5	1	5	5	5	5	5	5	5	5
2021-07-13 15:19:55	2021-07-13 15:33:58	100	1	1	33	156	55	16	2	2	#NULL!	1	2	1	4	7	4	2	1	4	1	heart valve insufficiency	2	#NULL!	1	5	1	5	3	3	3	5	3	2	4	1	4	5	4	1	5	2	5	5	5	5	4	4	4
2021-07-13 15:29:51	2021-07-13 15:45:27	100	1	1	28	160	46	17	2	2	#NULL!	1	2	1	3	7	2	2	2	2	1	lactose sensitivity	1	15	0	4	1	2	2	2	2	2	2	2	2	1	1	5	5	4	4	1	4	4	5	1	1	1	2
2021-07-13 18:11:08	2021-07-13 18:20:07	100	1	1	25	167	59	19	2	2	#NULL!	1	3	1	1	7	4	2	1	8	2		3	#NULL!	1	5	4	2	4	5	4	4	4	3	4	2	2	5	5	5	5	5	5	5	5	3	3	3	3
2021-07-13 20:16:12	2021-07-13 20:26:12	100	1	1	22	159	106	12	2	2	#NULL!	1	2	1	3	7	4	2	2	1	1	Hashimoto	1	60	1	5	1	5	5	5	4	5	5	5	5	1	1	5	5	5	1	5	1	5	5	4	3	1	4
2021-07-14 00:07:18	2021-07-14 00:25:28	100	1	1	24	165	50	17	2	2	#NULL!	1	2	1	4	7	4	2	1	8	2		3	#NULL!	1	4	1	2	2	4	3	3	3	4	3	4	3	4	5	3	3	4	1	5	5	3	3	3	4
2021-07-14 16:07:16	2021-07-14 16:21:30	100	1	1	23	156	60	13	2	2	#NULL!	1	3	1	4	7	2	2	1	2	1	a few months ago I was fiagnosed with hypo/hyper thyrodism. Now I am balanced	2	0	1	3	3	4	3	3	4	5	3	5	3	1	1	5	5	4	1	4	4	4	5	1	4	4	4
2021-07-14 23:41:17	2021-07-15 00:02:02	100	1	1	28	153	48	12	2	2	#NULL!	1	3	1	1	7	1	1	1	2	1	ulcerative colitis	1	90	1	5	1	1	2	2	4	2	3	3	4	1	1	5	4	5	4	4	5	4	5	2	3	2	4
2021-07-15 09:22:29	2021-07-15 09:33:49	100	1	1	32	160	112	17	2	2	#NULL!	1	2	1	1	7	5	2	2	4	1	asthma	1	34	0	3	1	2	3	3	3	1	2	2	3	1	1	4	5	1	5	2	1	3	1	2	1	1	2
2021-07-15 17:26:46	2021-07-15 17:38:55	100	1	1	25	165	63	13	2	2	#NULL!	1	3	1	3	7	4	2	1	8	2		3	#NULL!	1	4	1	2	4	3	4	1	4	2	4	2	2	5	4	1	4	4	5	5	5	4	4	2	3
2021-07-16 16:03:53	2021-07-16 16:17:29	100	1	1	22	165	65	12	2	2	#NULL!	1	2	1	3	7	4	2	2	8	2		3	#NULL!	1	4	1	1	3	1	1	1	2	1	3	1	1	5	4	2	4	1	3	3	5	1	4	3	4
2021-07-16 17:02:34	2021-07-16 17:15:30	100	1	1	23	157	47	12	2	2	#NULL!	1	2	1	4	7	4	2	3	1	2		2	#NULL!	0	4	1	3	2	2	4	5	2	3	3	1	1	5	5	5	5	5	1	4	4	3	2	2	2
2021-07-17 13:19:50	2021-07-17 14:06:32	100	1	1	24	154	47	17	2	2	#NULL!	1	2	5	4	7	4	2	1	3	2		1	79	1	5	4	2	4	4	5	3	4	2	5	4	3	4	5	3	5	3	1	5	1	4	5	4	4
2021-07-18 15:48:14	2021-07-18 16:00:39	100	1	1	23	155	52	12	2	2	#NULL!	1	3	1	3	7	4	2	3	1	2		1	20	1	5	1	1	3	1	3	1	3	1	5	2	4	5	5	5	5	5	5	5	5	3	3	2	5
2021-07-18 16:33:21	2021-07-18 16:44:28	100	1	1	26	172	72	16	2	2	#NULL!	1	2	1	3	7	4	2	3	3	1	asthma	1	31	1	5	2	1	4	4	4	1	5	1	5	1	1	5	5	4	5	4	4	5	5	4	4	4	2
2021-07-18 16:38:08	2021-07-18 16:52:30	100	1	1	26	169	50	15	2	2	#NULL!	1	2	1	3	7	2	1	1	1	1	colitis	4	20	1	3	2	4	3	3	3	5	3	4	4	2	2	5	5	3	4	5	3	4	5	4	4	4	4
2021-07-18 16:50:31	2021-07-18 17:01:40	100	1	1	27	169	75	12	2	2	#NULL!	1	2	1	4	7	4	2	1	4	1	asthma	2	#NULL!	1	5	1	2	2	2	3	2	4	4	5	1	2	5	5	4	5	5	5	5	5	5	5	2	3
2021-07-18 16:56:32	2021-07-18 17:05:29	100	1	1	26	148	39	16	2	2	1948	1	2	1	3	7	4	3	1	8	2		4	31	1	4	1	2	4	2	4	3	3	3	3	3	3	5	5	4	4	3	5	3	5	3	3	2	3
2021-07-18 17:03:31	2021-07-18 17:11:12	100	1	1	27	155	52	15	2	2	#NULL!	1	2	1	1	7	2	2	2	9	1	asthma and celiac disease	4	41	0	2	2	1	2	3	3	5	2	2	3	1	3	3	5	3	2	2	1	3	5	3	2	1	3
2021-07-18 17:10:00	2021-07-18 17:22:37	100	1	1	24	164	61	14	2	2	1948	1	2	1	4	7	4	2	2	4	2		2	#NULL!	1	5	3	5	4	5	5	5	5	2	5	2	2	5	5	5	5	5	5	5	5	5	5	5	5
2021-07-18 17:36:46	2021-07-18 17:48:15	100	1	1	27	170	62	18	2	2	#NULL!	1	2	5	3	7	2	2	2	8	2		3	#NULL!	1	5	1	3	3	4	1	2	3	3	3	1	3	5	5	2	2	2	5	5	5	2	4	4	2
2021-07-18 18:13:11	2021-07-18 18:28:49	100	1	1	23	172	54	#NULL!	2	2	#NULL!	2	1	1	1	7	3	2	2	5	1	OCD	1	60	1	4	1	3	2	4	5	4	3	3	4	2	1	5	3	2	4	3	5	3	5	4	4	1	2
2021-07-18 18:37:45	2021-07-18 18:47:19	100	1	1	28	164	54	15	2	2	#NULL!	1	2	1	1	7	4	2	2	8	2		3	#NULL!	1	5	1	1	3	3	4	2	3	1	4	2	3	5	2	4	1	3	4	1	5	2	2	1	1
2021-07-18 18:36:22	2021-07-18 18:50:24	100	1	1	37	145	60	17	2	2	#NULL!	1	2	1	4	7	4	2	2	7	1	spondyloepiphyseal dysplasia	1	69	1	4	1	1	3	2	3	1	3	1	3	1	1	1	1	1	5	5	5	5	1	4	3	1	2
2021-07-18 18:41:41	2021-07-18 18:51:43	100	1	1	36	156	57	18	2	2	#NULL!	1	3	1	1	7	4	2	1	8	2		4	53	1	3	1	1	4	3	3	1	3	2	3	1	3	5	5	5	5	5	5	5	5	5	5	5	2
2021-07-18 18:54:56	2021-07-18 19:10:46	100	1	1	26	169	50	17	2	2	2000	4	2	5	4	7	4	2	1	8	1	migraines	1	80	1	4	2	1	3	3	3	3	3	1	3	2	2	5	5	5	5	5	5	5	5	4	5	5	3
2021-07-18 18:23:47	2021-07-18 19:17:21	100	1	1	24	152	65	13	2	2	#NULL!	1	2	1	4	7	2	2	3	9	1	Krohn's disease	4	60	1	5	2	4	4	4	4	5	4	2	4	3	3	5	4	2	3	4	3	5	5	3	4	3	4
2021-07-18 19:37:07	2021-07-18 19:45:27	100	1	1	23	170	60	15	2	2	#NULL!	1	2	1	4	7	4	2	1	1	2	only ADD	1	8	1	5	1	3	3	5	5	2	3	2	5	1	1	5	5	5	5	5	5	5	5	4	5	5	5
2021-07-18 19:44:34	2021-07-18 20:04:11	100	1	1	21	156	58	13	2	2	#NULL!	1	2	1	3	7	4	1	1	8	2		3	#NULL!	1	4	2	1	4	2	5	1	2	1	4	1	1	5	3	3	3	2	4	5	5	4	5	5	5
2021-07-18 19:49:38	2021-07-18 20:06:52	100	1	1	33	169	61	17	2	2	#NULL!	1	2	1	3	7	2	2	2	4	1	asthma	2	#NULL!	1	3	1	2	2	2	2	2	2	3	2	2	2	3	3	3	1	1	1	2	3	2	2	2	2
2021-07-18 19:48:46	2021-07-18 20:07:28	100	1	1	28	166	55	17	2	2	#NULL!	1	2	1	1	7	4	2	2	8	2		3	#NULL!	0	4	1	1	3	4	4	3	3	3	4	1	2	5	5	5	5	5	4	4	5	2	2	1	2
2021-07-18 20:08:09	2021-07-18 20:30:10	100	1	1	26	168	62	16	2	2	#NULL!	1	2	1	3	7	4	2	1	1	1	ADD in highschool and misophonia at 22	1	70	1	5	2	3	3	4	4	5	3	2	4	2	3	5	5	3	5	5	1	5	5	2	5	4	4
2021-07-18 20:39:31	2021-07-18 20:46:23	100	1	1	23	160	59	15	2	2	#NULL!	1	2	1	4	7	4	2	1	2	1	endometriosis and lactose sentsitivity	1	79	1	5	3	2	3	5	5	2	4	3	4	2	3	5	5	5	5	5	2	5	5	4	5	3	2
2021-07-18 22:39:02	2021-07-18 22:51:15	100	1	1	24	165	61	14	2	2	#NULL!	1	2	1	4	7	4	2	1	8	2		3	#NULL!	1	5	3	2	5	3	5	2	5	1	5	1	1	5	4	5	3	5	5	5	5	4	5	2	4
2021-07-18 23:58:35	2021-07-19 00:09:33	100	1	1	25	167	68	16	2	2	#NULL!	1	2	1	4	7	4	2	2	7	2		1	38	1	5	3	4	3	4	4	5	3	4	4	3	3	5	5	3	5	5	1	5	5	4	4	3	4
2021-07-19 00:31:18	2021-07-19 00:41:46	100	1	1	23	167	58	12	2	2	#NULL!	1	2	1	3	7	4	2	3	8	2		3	#NULL!	1	5	3	3	3	5	3	3	3	1	5	2	2	3	5	5	3	5	1	5	5	5	4	2	1
2021-07-19 00:28:18	2021-07-19 00:41:53	100	1	1	23	157	60	12	2	2	#NULL!	1	2	1	3	7	2	2	2	8	2		#NULL!	#NULL!	1	5	2	3	4	5	4	4	3	4	4	3	2	5	4	1	5	5	5	2	5	2	4	2	4
2021-07-19 00:47:59	2021-07-19 00:57:09	100	1	1	27	173	60	17	2	2	#NULL!	1	2	1	3	7	4	2	2	8	1	asthma	4	27	1	5	2	1	3	5	4	4	3	5	5	2	2	5	5	4	5	4	5	5	4	5	5	1	2
2021-07-19 00:42:52	2021-07-19 01:01:42	100	1	1	35	152	47	18	2	2	#NULL!	1	2	1	1	7	4	2	1	5	2		1	75	1	5	1	2	5	5	4	3	3	4	4	2	3	5	5	5	5	5	4	5	5	3	2	2	4
2021-07-19 01:01:14	2021-07-19 01:11:56	100	1	1	26	176	76	16	2	2	#NULL!	1	2	1	4	7	4	2	2	7	2		3	#NULL!	0	5	2	1	2	3	4	1	3	2	4	1	3	5	5	4	5	5	4	5	5	3	4	1	4
2021-07-19 01:30:02	2021-07-19 01:46:29	100	1	1	29	116	96	16	2	2	#NULL!	1	2	1	4	7	3	2	1	7	1		4	56	1	5	2	4	3	3	3	2	4	4	4	5	5	5	3	4	3	4	5	5	5	4	5	2	3
2021-07-19 01:49:20	2021-07-19 02:04:33	100	1	1	20	166	68	12	2	2	#NULL!	1	1	1	3	7	4	2	1	8	2		3	#NULL!	1	5	1	2	4	3	4	2	4	4	5	1	2	5	5	4	2	5	4	5	5	4	4	3	1
2021-07-19 02:32:26	2021-07-19 02:42:01	100	1	1	29	165	57	15	2	2	#NULL!	1	2	1	3	7	4	2	1	8	2		4	#NULL!	1	3	1	1	3	3	2	3	2	2	3	3	3	5	4	5	3	2	5	1	5	3	4	2	2
2021-07-19 03:31:09	2021-07-19 03:42:45	100	1	1	22	163	60	12	2	2	#NULL!	1	3	1	3	7	4	2	3	8	2		3	#NULL!	1	5	1	2	3	3	3	1	3	5	5	1	1	5	4	3	2	1	5	1	3	1	2	2	2
2021-07-19 08:12:21	2021-07-19 08:24:35	100	1	1	26	180	64	17	2	2	1995	4	2	1	3	7	4	2	2	8	2		3	#NULL!	1	5	1	4	4	4	5	5	4	1	4	1	1	5	5	2	5	5	5	5	5	1	4	1	3
2021-07-19 09:14:24	2021-07-19 09:25:14	100	1	1	27	170	61	15	2	2	#NULL!	1	2	1	4	7	4	2	2	1	2		3	#NULL!	1	5	3	1	4	4	4	2	4	1	5	2	2	2	3	2	5	5	5	5	5	4	3	4	4
2021-07-19 09:35:04	2021-07-19 09:45:18	100	1	1	27	170	78	15	2	2	#NULL!	1	2	1	3	7	4	2	1	8	2		3	#NULL!	1	5	2	2	4	4	4	4	3	3	3	2	2	3	5	4	5	5	5	5	5	5	4	2	3
2021-07-19 10:29:21	2021-07-19 10:41:15	100	1	1	23	167	51	17	2	2	#NULL!	1	2	1	4	7	4	2	3	8	2		3	#NULL!	1	5	1	1	3	2	3	4	2	3	3	1	2	5	5	4	2	4	5	5	5	3	3	1	3
2021-07-19 12:39:47	2021-07-19 12:58:42	100	1	1	27	173	60	14	2	2	#NULL!	2	2	1	4	7	2	2	2	4	1	Celiac, Graves, a congenital heart lesion	1	25	1	4	1	1	3	3	2	1	2	1	3	4	3	4	5	5	5	3	4	5	4	4	5	4	2
[truncated: 107 more columns]
